# Supplementary material for: Novel trinitroethanol derivatives: high energetic 2-(2,2,2-trinitroethoxy)-1,3,5-triazines
Source: Royal Society of Chemistry journal article supplement (doi:10.1039/c6ra05826d), 2016-01-01

## Electronic Supplementary Information

# Novel Trinitroethanol Derivatives: High Energetic 2-(2,2,2-Trinitroethoxy)-1,3,5-triazines

Alexander A. Gidaspov,<sup>a</sup> Vladimir A. Zalomlenkov,<sup>a</sup> Vladimir V. Bakharev,<sup>a</sup>  
Victor E. Parfenov,<sup>a</sup> Evgeniy V. Yurtaev,<sup>a</sup> Marina I. Struchkova,<sup>b</sup> Nadezhda V.  
Palysaeva,<sup>b</sup> Kyrill Yu. Suponitsky,<sup>c</sup> David B. Lempert,<sup>d</sup> and Aleksei B.  
Sheremetev<sup>b\*</sup>

<sup>a</sup> Samara State Thechnical University, Samara, 443100, Russian Federation

<sup>b</sup> N. D. Zelinsky Institute of Organic Chemistry, Russian Academy of Sciences,  
Moscow 119991, Russian Federation, Fax: +7 499 135 5328; e-mail: [sab@ioc.ac.ru](mailto:sab@ioc.ac.ru)

<sup>b</sup> A. N. Nesmeyanov Institute of Organoelement Compounds, Russian Academy of Sciences,  
Moscow 119991, Russian Federation, Fax: +7 499 135 5085; e-mail: [kirshik@yahoo.com](mailto:kirshik@yahoo.com)

<sup>d</sup> Institute of Problems of Chemical Physics, Russian Academy of Sciences, Chernogolovka,  
Moscow region, 142432 Russian Federation.

| Contents                                                                                                                         | Page |
|----------------------------------------------------------------------------------------------------------------------------------|------|
| General Information                                                                                                              | S1   |
| Synthesis                                                                                                                        | S2   |
| Geometry characteristics of molecules of compounds <b>16</b> , <b>21</b> , and <b>20</b>                                         | S4   |
| Description of intermolecular interactions for compounds <b>16</b> , <b>21</b> , and <b>20</b>                                   | S5   |
| Aliphatic trinitroethoxy compounds                                                                                               | S13  |
| Description of intermolecular interactions for cyanuric acid                                                                     | S16  |
| Crystallographic data of low-temperature and room-temperature experiments<br>for compounds <b>16</b> , <b>21</b> , and <b>20</b> | S18  |
| NMR Spectra                                                                                                                      | S20  |

## Experimental Section

**Caution!** All prepared compounds are highly energetic materials and sensitive to various stimuli. Although none of the compounds described herein has exploded or detonated in the course of this research, safety precautions, such as face shields, a leather apron, gloves, and hearing protection should be employed. These compounds should only be prepared by an experienced synthetic chemist and should be handled with great care.

**General:** All the reagents were of analytical grade, purchased from commercial sources, and used as received. Infrared spectra were determined in KBr pellets on a Perkin–Elmer Model 577

spectrometer. Mass-spectra were recorded on a Varian MAT-311 A instrument. The  $^1\text{H}$ ,  $^{13}\text{C}$ ,  $^{15}\text{N}$ , and  $^{14}\text{N}$  NMR spectra were recorded on a Bruker AM-300 instrument at 300.13, 75.47, 50.7, and 21.68 MHz, respectively. The chemical shift values ( $\delta$ ) are expressed relative to the chemical shift of the [D]solvent or to external standard (nitromethane for  $^{14}\text{N}$  and  $^{15}\text{N}$  NMR) without correction. Analytical TLC was performed using commercially pre-coated silica gel plates (Silufol UV<sub>254</sub>), and visualization was effected with short-wavelength UV-light. Melting points were determined on Gallenkamp melting point apparatus and they are uncorrected. The decomposition points were recorded on a thermogravimetric analyzer (TGA) at a scan rate of  $5^\circ\text{C min}^{-1}$  or  $10^\circ\text{C min}^{-1}$ . Elemental analyses were obtained by using a CHNS/O Analyzer 2400 (Perkin–Elmer instruments Series II).

**2-Isopropoxy-4-(2,2,2-trinitroethoxy)-6-(trinitromethyl)-1,3,5-triazine (15a).**

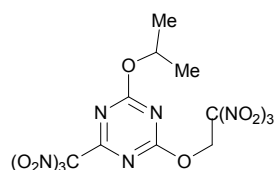

consisting trinitroethanol (7.24 g, 40 mmol), 2-isopropoxy-4,6-bis(trinitromethyl)-1,3,5-triazine **14a** (4.37 g, 10 mmol), potassium trinitromethanide (1.89 g, 10 mmol), and absolute acetone (25 mL) was stirred at room temperature for *ca.* 44 h (TLC monitoring). The mixture was filtered and then concentrated (50%) in *vacuo*. The filtrate was diluted by water (70 mL) to give a suspension that was neutralized to pH 7 with  $\text{NaHCO}_3$ . The precipitate was filtered off, washed with water ( $4 \times 20$  mL), and dried to give a bright yellow solid **15a**. Recrystallization from isopropanol gave a colorless solid (2.48 g, 50 %), mp  $104\text{--}105^\circ\text{C}$ .  $^1\text{H}$  NMR ( $\text{CDCl}_3$ ):  $\delta$  = 1.47 (d, 6H, Me,  $J$  = 6 Hz), 5.37 (s, 1H, OCH), 5.73 ppm (s, 2H,  $\text{CH}_2$ );  $^{13}\text{C}$  NMR ( $\text{CDCl}_3$ ):  $\delta$  = 21.3 (Me), 64.5 ( $\text{OCH}_2$ ), 76.9 (OCH), 122.1 (bs,  $\text{C}(\text{NO}_2)_3$ ), 164.7 ( $\text{N}=\text{C}-\text{C}(\text{NO}_2)_3$ ), 170.7 ( $\text{N}=\text{C}-\text{OCHMe}_2$ ), 171.4 ppm ( $\text{N}=\text{C}-\text{OCH}_2$ );  $^{14}\text{N}$  NMR (acetone- $d_6$ ):  $\delta$  = -36.7, -39.2 ppm. IR:  $\nu$  = 2995, 2939, 2924, 2881, 1635, 1595, 1524, 1506, 1444, 1423, 1379, 1327, 1304, 1254, 1173, 1128, 1095, 989, 910, 894, 843, 824, 800, 783, 748, 658, 604, 571  $\text{cm}^{-1}$ ; elemental analysis calcd (%) for  $\text{C}_9\text{H}_9\text{N}_9\text{O}_{14}$  (467.22): C 23.44, H 1.94, N 26.98; found: C 23.11, H 2.03, N 27.04.

**2-(Adamantan-1-oxy)-4-(2,2,2-trinitroethoxy)-6-(trinitromethyl)-1,3,5-triazine (15b).**

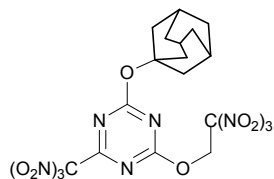

A mixture of trinitroethanol (7.24 g, 40 mmol), 2-(adamantan-1-oxy)-4,6-bis(trinitromethyl)-1,3,5-triazine **14b** (5.29 g, 10 mmol), and potassium trinitromethanide (1.89 g, 10 mmol) in absolute acetone (25 mL) was stirred at room temperature for *ca.* 48 h (TLC monitoring). The mixture was worked up as described above, giving 3.35 g (60%) product **15b**, mp  $149\text{--}150^\circ\text{C}$  (dec.).  $^1\text{H}$  NMR ( $\text{CDCl}_3$ ):  $\delta$  = 1.72 (s, 6H, Ad), 2.24 (s, 6H, Ad), 2.31 (s, 3H, Ad), 5.72 ppm (s, 2H,  $\text{CH}_2$ );  $^{13}\text{C}$  NMR ( $\text{CDCl}_3$ ):  $\delta$  = 31.3 (Ad), 35.8 (Ad), 41.0 (Ad), 64.5 ( $\text{OCH}_2$ ), 90.2 (Ad), 122.3 (bs,  $\text{C}(\text{NO}_2)_3$ ), 164.2 ( $\text{N}=\text{C}-\text{C}(\text{NO}_2)_3$ ), 170.5 ( $\text{N}=\text{C}-\text{OAd}$ ), 171.2 ppm ( $\text{N}=\text{C}-\text{OCH}_2$ ); IR:  $\nu$  = 3023, 2925, 2854, 1581, 1515, 1442, 1411, 1369, 1330, 1297, 1240, 1126, 1083, 1039, 960, 865, 829, 815, 796  $\text{cm}^{-1}$ ; elemental analysis calcd (%) for  $\text{C}_{16}\text{H}_{17}\text{N}_9\text{O}_{14}$  (559.37): C 34.36, H 3.06, N 22.54; found: C 34.39, H 3.11, N 22.59.

**General synthesis of 2-amino-substituted 4,6-bis(2,2,2-trinitroethoxy)-1,3,5-triazines (22a-c).**

An amine (3 mmol) was added dropwise to a solution of compound **16** (0.618 g, 1 mmol) in DCE (3 mL) at  $10\text{--}15^\circ\text{C}$  for *ca.* 1 h. The mixture was stirred at room temperature until the completion (TLC monitoring; *iso*-propylamine – 72 h, pyrrolidine – 24 h, morpholine – 24 h).

The reaction mixture was filtered and the filtrate was evaporated in *vacuo* to dryness. The residue was stirred with cold water (2x40 mL) for 40 min and then with hot water (2x40 mL) for 40 min. The solid was filtered off and dried in air.

**2-iso-Propylamino-4,6-bis(2,2,2-trinitroethoxy)-1,3,5-triazine (22a).** The yield is 43%, mp 126-127°C (dec.). <sup>1</sup>H NMR (DMSO-d<sub>6</sub>) δ = 1.14-1.18 (m, 6H CH<sub>3</sub>), 4.10-4.118 (m, 1H, CH), 6.10-6.18 (m, 4H, OCH<sub>2</sub>), 8.53-8.59 ppm (m, 1H, NH). <sup>13</sup>C NMR (DMSO-d<sub>6</sub>) δ = 21.9, (CH<sub>3</sub>), 42.6 (NCH(CH<sub>3</sub>)<sub>2</sub>), 63.31 (OCH<sub>2</sub>), 124.2 (C(NO<sub>2</sub>)<sub>3</sub>), 165.96 (C-N), 169.34, 169.93 ppm (C-OCH<sub>2</sub>C(NO<sub>2</sub>)<sub>3</sub>). <sup>14</sup>N NMR (DMSO-d<sub>6</sub>) δ = -36,34 ppm. IR: ν = 3423,

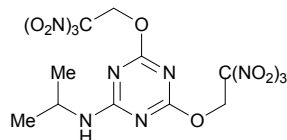

3275, 3198, 3155, 2980, 2941, 2893, 1597, 1549, 1468, 1450, 1431, 1412, 1371, 1335, 1298, 1244, 1178, 1146, 1132, 1090, 982, 881, 856, 804, 783, 723, 644, 548 cm<sup>-1</sup>; elemental analysis calcd (%) for C<sub>10</sub>H<sub>12</sub>N<sub>10</sub>O<sub>14</sub> (497.27): C 24.20; H 2.44; N 28.22; found: C 24.25; H 2.38; N 28.26.

**2-Pyrrolidino-4,6-bis(2,2,2-trinitroethoxy)-1,3,5-triazine (22b).** The yield is 65%, mp 150-151 °C (dec.). <sup>1</sup>H NMR (DMSO-d<sub>6</sub>) δ = 1.98 (s, 4H, CH<sub>2</sub>CH<sub>2</sub>); 3.6 (s, 4H, CH<sub>2</sub>NCH<sub>2</sub>); 6.2 ppm (s, 4H, OCH<sub>2</sub>). <sup>13</sup>C NMR (DMSO-d<sub>6</sub>) δ = 24.48 (CH<sub>2</sub>CH<sub>2</sub>), 46.74 (CH<sub>2</sub>NCH<sub>2</sub>), 63.3 (OCH<sub>2</sub>), 124.54 (C(NO<sub>2</sub>)<sub>3</sub>), 163.61 (C-N), 169.31 ppm (C-OCH<sub>2</sub>C(NO<sub>2</sub>)<sub>3</sub>). <sup>14</sup>N NMR (DMSO-d<sub>6</sub>) δ =

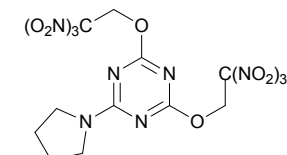

-32,39 ppm. IR: ν = 3192, 3014, 2972, 2929, 2889, 2669, 2591, 2503, 1603, 1531, 1475, 1458, 1414, 1373, 1335, 1302, 1248, 1196, 1182, 1136, 1090, 1041, 968, 914, 879, 856, 839, 806, 785, 746, 654, 559 cm<sup>-1</sup>; elemental analysis calcd (%) for C<sub>11</sub>H<sub>12</sub>N<sub>10</sub>O<sub>14</sub> (508.28): C 25.99; H 2.38; N 27.56; found: C 26.01; H 2.30; N 27.51.

**2-Morpholino-4,6-bis(2,2,2-trinitroethoxy)-1,3,5-triazine (22c).** The yield is 80%, mp 175 °C (dec.). <sup>1</sup>H NMR (DMSO-d<sub>6</sub>) δ = 3.68 (s, 4H, CH<sub>2</sub>NCH<sub>2</sub>); 3.82 (s, 4H, CH<sub>2</sub>OCH<sub>2</sub>); 6.2 ppm (s, 4H, OCH<sub>2</sub>). <sup>13</sup>C NMR (CDCl<sub>3</sub>) δ = 44.08 (CH<sub>2</sub>NCH<sub>2</sub>), 63.36 (OCH<sub>2</sub>C(NO<sub>2</sub>)<sub>3</sub>), 65.69 (CH<sub>2</sub>OCH<sub>2</sub>), 122.06 (C(NO<sub>2</sub>)<sub>3</sub>), 165.32 (C-N), 169.79 ppm (C-OCH<sub>2</sub>C(NO<sub>2</sub>)<sub>3</sub>). IR: ν =

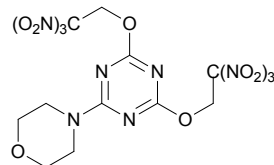

3423, 3005, 2964, 2926, 2874, 1618, 1599, 1527, 1450, 1414, 1369, 1335, 1304, 1282, 1267, 1250, 1200, 1138, 1115, 1086, 1072, 1022, 889, 875, 856, 835, 804, 785, 748, 669, 650, 553, 540 cm<sup>-1</sup>. elemental analysis calcd (%) for C<sub>11</sub>H<sub>12</sub>N<sub>10</sub>O<sub>15</sub> (524.28), %: C 25.20; H 2.31; N 26.72; found: C 25.22; H 2.21; N 26.77.

**Table 1S.** Selected torsion angles (°) in symmetrically independent molecules A, A', A'' of compound **16**, as well as compounds **21** and **20**.

| Torsion angle | <b>16</b>  |           |           | <b>21</b> | <b>20</b> |
|---------------|------------|-----------|-----------|-----------|-----------|
|               | A          | A'        | A''       |           |           |
| N1-C1-O1-C4   | 178.8(6)   | -173.2(6) | -171.3(6) | -175.1(2) | -178.8(2) |
| C1-O1-C4-C5   | 129.9(6)   | 117.5(7)  | 113.7(7)  | 158.7(2)  | -144.1(2) |
| O1-C4-C5-N4   | 40.4(7)    | 36.5(8)   | 41.6(8)   | 49.2(2)   | -44.2(2)  |
| O1-C4-C5-N5   | -80.2(7)   | -83.2(7)  | -80.3(7)  | -73.5(2)  | 75.8(2)   |
| O1-C4-C5-N6   | 159.8(5)   | 155.9(6)  | 161.3(6)  | 168.6(2)  | -163.6(2) |
| C4-C5-N4-O2   | -131.3(7)  | -127.4(7) | -121.1(7) | -141.0(2) | 107.0(2)  |
| C4-C5-N5-O5   | -139.5(7)  | -141.9(9) | -151.5(7) | -136.9(2) | 169.6(2)  |
| C4-C5-N6-O6   | -141.6(7)  | -142.2(7) | -140.6(7) | -145.8(2) | 150.8(2)  |
| N2-C2-O8-C6   | 172.7(6)   | 179.2(6)  | -179.8(6) | 177.9(2)  |           |
| C2-O8-C6-C7   | 160.7(7)   | 161.4(6)  | 162.7(6)  | 167.6(2)  |           |
| O8-C6-C7-N7   | 46.8(9)    | -50.0(7)  | -50.2(7)  | 54.6(2)   |           |
| O8-C6-C7-N8   | -78.5(8)   | 73.6(7)   | 70.6(7)   | -68.0(2)  |           |
| O8-C6-C7-N9   | 166.1(6)   | -167.2(5) | -168.5(5) | 174.2(2)  |           |
| C6-C7-N7-O9   | -114.3(10) | 140.8(7)  | 143.7(7)  | 111.7(2)  |           |
| C6-C7-N8-O12  | -127.1(8)  | 137.6(7)  | 123.3(7)  | 150.6(2)  |           |
| C6-C7-N9-O13  | -157.7(8)  | 137.8(7)  | 144.5(7)  | 143.6(2)  |           |
| N3-C3-O15-C8  | 176.3(6)   | 179.7(6)  | 178.8(6)  |           |           |
| C3-O15-C8-C9  | -131.8(7)  | -145.6(6) | -143.2(6) |           |           |
| O15-C8-C9-N10 | -45.8(8)   | -42.2(8)  | -42.6(8)  |           |           |
| O15-C8-C9-N11 | 77.0(8)    | 80.5(7)   | 78.0(8)   |           |           |
| C8-C9-N10-O17 | 137.1(8)   | 130.0(7)  | 127.9(7)  |           |           |
| C8-C9-N11-O19 | 126.3(7)   | 146.2(7)  | 145.3(7)  |           |           |
| C8-C9-N12-O20 | 133.4(7)   | 130.6(7)  | 133.4(7)  |           |           |

**Estimation of of pair intermolecular interaction energies** was carried out as follows.

1. The closest molecular surroundings was chosen based on consideration of shortened intermolecular contacts. Molecule is considered to be the closest neighbour if at least one intermolecular contact is equal to or less than van-der-Waals radius + 0.1 Å.
2. So chosen pairs were taken for quantum chemical calculation using X-ray geometry without further optimization
3. Calculation was carried out within M052X/6-311G(df,pd) level of theory using the Gaussian program [Frisch, M. J.; Trucks, G. W.; Schlegel, H. B.; Scuseria, G. E.; Robb, M. A.; Cheeseman, J. R.; Montgomery, J. A., Jr.; Kudin, K. N.; Burant, J. C.; Millam, J. M.; Iyengar, S. S.; Tomasi, J.; Barone, V.; Mennucci, B.; Cossi, M.; Scalmani, G.; Rega, N.; Petersson, G. A.; Nakatsuji, H.; Hada, M.; Ehara, M.; Toyota, K.; Fukuda, R.; Hasegawa, J.; Ishida, M.; Nakajima, T.; Honda, Y.; Kitao, O.; Nakai, H.; Klene, M.; Li, X.; Knox, J. E.; Hratchian, H. P.; Cross, J. B.; Bakken, V.; Adamo, C.; Jaramillo, J.; Gomperts, R.; Stratmann, R. E.; Yazyev, O.; Austin, A. J.; Cammi, R.; Pomelli, C.; Ochterski, J. W.; Ayala, P. Y.; Morokuma, K.; Voth, G. A.; Salvador, P.; Dannenberg, J. J.; Zakrzewski, V. G.; Dapprich, S.; Daniels, A. D.; Strain, M. C.; Farkas, O.; Malick, D. K.; Rabuck, A. D.; Raghavachari, K.; Foresman, J. B.; Ortiz, J. V.; Cui, Q.; Baboul, A. G.; Clifford, S.; Cioslowski, J.; Stefanov, B. B.; Liu, G.; Liashenko, A.; Piskorz, P.; Komaromi, I.; Martin, R. L.; Fox, D. J.; Keith, T.; Al-Laham, M. A.; Peng, C. Y.; Nanayakkara, A.; Challacombe, M.; Gill, P. M. W.; Johnson, B.; Chen, W.; Wong, M. W.; Gonzalez, C.; Pople, J. A. *Gaussian 03, Revision E.01*; Gaussian, Inc.: Wallingford, CT, 2004.]
4. Pair intermolecular energy was estimated as the difference between the energy of dimer and twice the energy of isolated molecule including BSSE.

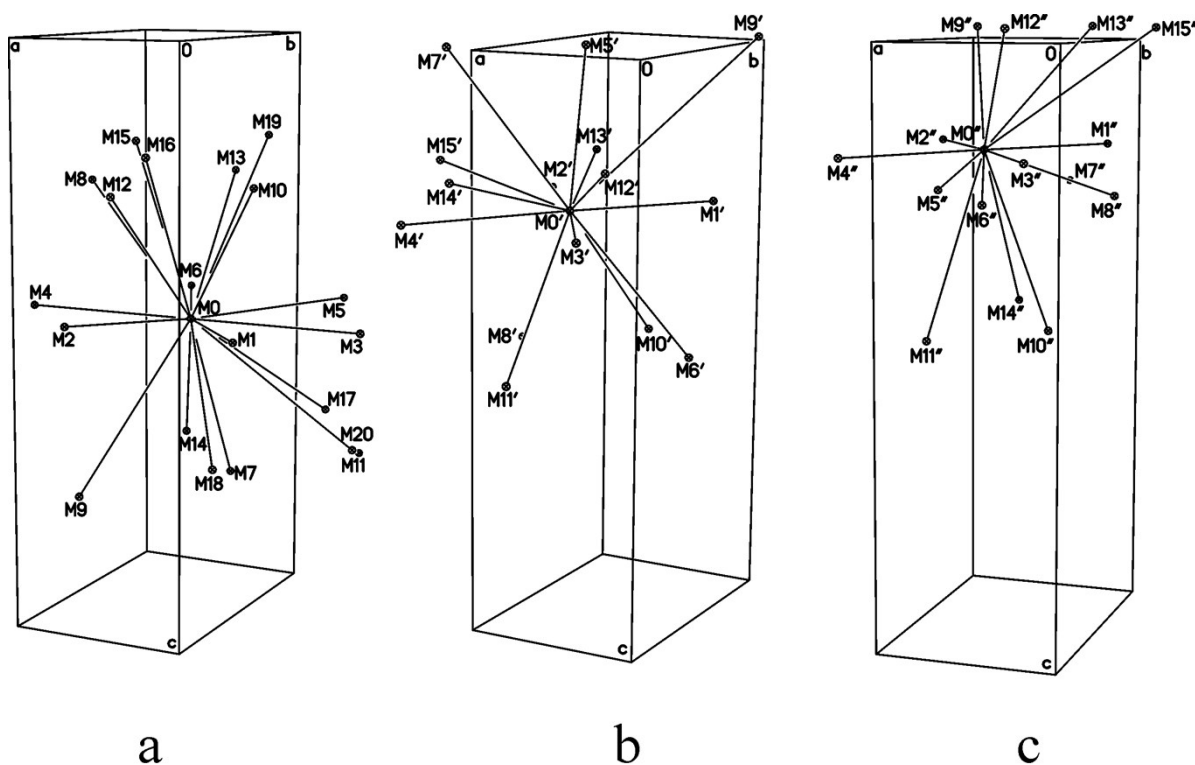

**Figure 1S.** Intermolecular interaction pattern of molecules A (a), A' (b) and A'' (c) in the crystal structure of compound **16**. Central molecule and its environment are represented as small circles; central molecules are denoted as M0, M0', M0''. Numbering of the environment corresponds to Tables 2S-4S.

Molecules in the crystal of compound **16** are connected to each other by peak/hole interactions of the nitrogen and oxygen atoms of the nitro groups as well as by stacking interactions between  $\pi$ -density of the triazine rings, and C-H...O contacts. Atoms of the nitro groups are involved in nearly all close contacts observed (Tables 2S-4S). For the molecule A, the strongest interaction is observed between molecules of the same type (A...A, M0...M1, M0...M2), however relatively strong interactions are also observed for A...A' and A...A'' pairs (M0...M7, M0...M14, M0...M15). At the same time, molecules A' and A'' strongly interact to each other; the strongest attraction is provided by the triazine...triazine stacking interaction and by the nitro group...nitro group peak/hole interaction. A number of A'...A' and A''...A'' interacting pairs is relatively low and their energies are smaller.

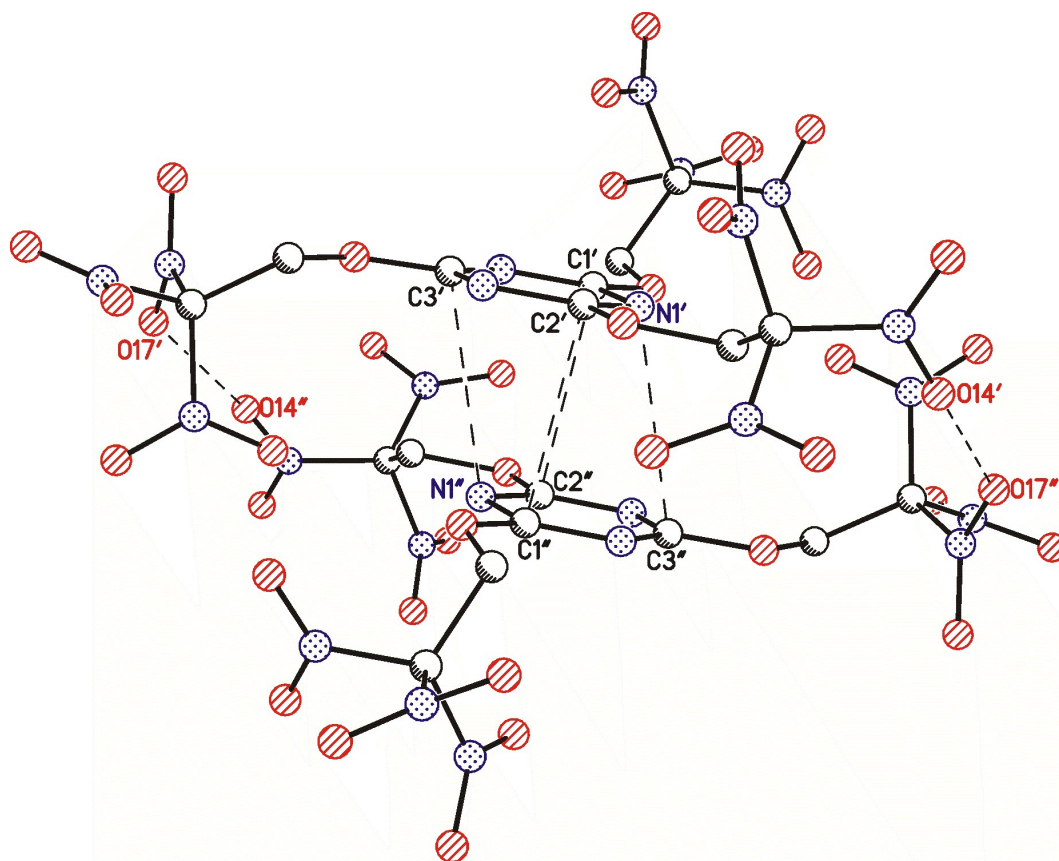

**Figure 2S.** Stacking-connected dimer for molecular pair A'...A'' (M0'...M12', Entry 12). The shortest atom...atom contacts are given by dashed lines.



**Table 2S.** Pair intermolecular interaction energies (kcal/mol) and shortened contacts (Å) of molecule A of compound **16** with its closest environment in the crystal obtained at M052X/6-311G(df,pd) level of approximation

| Entry*                                        | No**   | Type of pair interaction | Shortened contact                                | Symmetry code      | Distance                         | Energy |
|-----------------------------------------------|--------|--------------------------|--------------------------------------------------|--------------------|----------------------------------|--------|
| 1                                             | –      | A...A                    | H4A...O3                                         | -1/2+x,1/2-y,z     | 2.505                            | -6.7   |
| 2                                             | –      | A...A                    | O3...H4A                                         | 1/2+x,1/2-y,z      | 2.505                            | -6.7   |
| 3                                             | –      | A...A                    | H8A...O13                                        | -1+x,y,z           | 2.641                            | -4.4   |
| 4                                             | –      | A...A                    | O13...H8A                                        | 1+x,y,z            | 2.641                            | -4.4   |
| 5                                             | –      | A...A                    | O21...O8<br>O21...O10                            | -1/2+x,1.5-y,z     | 3.011<br>2.810                   | -3.9   |
| 6                                             | –      | A...A                    | O8...O21<br>O10...O21                            | 1/2+x,1.5-y,z      | 3.011<br>2.810                   | -3.9   |
| 7                                             | (5')   | A...A'                   | O17...O21'                                       | 1/2-x,1/2+y,1/2+z  | 2.852                            | -4.1   |
| 8                                             | (6')   | A...A'                   | O14...O3'                                        | 1/2+x,1/2-y,z      | 2.822                            | -3.3   |
| 9                                             | (7')   | A...A'                   | H4B...O20'                                       | 1-x,-y,1/2+z       | 2.440                            | -3.1   |
| 10                                            | (8')   | A...A'                   | C3...O6'                                         | -1/2+x,1/2-y,z     | 2.855                            | -2.4   |
| 11                                            | (9')   | A...A'                   | O17...O12'<br>O19...O12'                         | -x,1-y,1/2+z       | 2.872<br>2.974                   | -0.6   |
| 12                                            | (10')  | A...A'                   | O2...O3'                                         | x,y,z              | 3.083                            | -0.4   |
| 13                                            | (11')  | A...A'                   | O9...O7'                                         | x,1+y,z            | 2.924                            | -0.1   |
| 14                                            | (9'')  | A...A''                  | N1...O6''<br>N3...O3''<br>C1...O3''<br>C2...O6'' | 1-x,1-y,1/2+z      | 2.842<br>3.064<br>3.158<br>2.920 | -5.4   |
| 15                                            | (10'') | A...A''                  | O11...O21''<br>N8...O21''                        | x,y,z              | 2.969<br>2.966                   | -4.0   |
| 16                                            | (11'') | A...A''                  | O5...O21''                                       | -1/2+x,1/2-y,z     | 2.860                            | -1.3   |
| 17                                            | (12'') | A...A''                  | O19...O7''<br>O21...O7''                         | 1/2-x,1/2+y,1/2+z  | 2.836<br>2.941                   | -1.1   |
| 18                                            | (13'') | A...A''                  | O7...O2''                                        | 1/2-x,-1/2+y,1/2+z | 2.875                            | -1.0   |
| 19                                            | (14'') | A...A''                  | O11...O12''                                      | -1/2+x,1.5-y,z     | 2.989                            | -0.8   |
| 20                                            | (15'') | A...A''                  | O17...O5''                                       | -x,1-y,1/2+z       | 3.038                            | -0.5   |
| Sum of all interaction energies of molecule A |        |                          |                                                  |                    |                                  | -58.1  |

\* Numbers of entries correspond to numbers of neighbouring molecules in Figure 1S

\*\* Numbers of entries given in the second column in parentheses correspond to the equivalent interactions from Tables 3S and 4S



**Table 3S.** Pair intermolecular interaction energies (kcal/mol) and shortened contacts (Å) of molecule A' of compound **16** with its closest environment in the crystal obtained at M052X/6-311G(df,pd) level of approximation

| Entry*                                        | No**  | Type of pair interaction | Shortened contact                                                                                                                                | Symmetry code       | Distance                                                                               | Energy |
|-----------------------------------------------|-------|--------------------------|--------------------------------------------------------------------------------------------------------------------------------------------------|---------------------|----------------------------------------------------------------------------------------|--------|
| 1'                                            | –     | A'...A'                  | O12'...N2'<br>O14'...O10'<br>O14'...C2'<br>H6'B...O10'                                                                                           | -1/2+x,1/2-y,z      | 2.991<br>3.001<br>2.971<br>2.426                                                       | -6.8   |
| 2'                                            | –     | A'...A'                  | O10'...O14'<br>O10'...H6'B<br>N2'...O12'<br>C2'...O14'                                                                                           | 1/2+x,1/2-y,z       | 3.001<br>2.426<br>2.991<br>2.971                                                       | -6.8   |
| 3'                                            | –     | A'...A'                  | O19'...O20'                                                                                                                                      | -1/2+x,-1/2-y,z     | 3.014                                                                                  | -0.3   |
| 4'                                            | –     | A'...A'                  | O20'...O19'                                                                                                                                      | 1/2+x,-1/2-y,z      | 3.014                                                                                  | -0.3   |
| 5'                                            | (7)   | A'...A                   | O21'...O17                                                                                                                                       | 1/2-x,-1/2+y,-1/2+z | 2.852                                                                                  | -4.1   |
| 6'                                            | (8)   | A'...A                   | O3'...O14                                                                                                                                        | -1/2+x,1/2-y,z      | 2.822                                                                                  | -3.3   |
| 7'                                            | (9)   | A'...A                   | O20'...H4B                                                                                                                                       | 1-x,-y,-1/2+z       | 2.440                                                                                  | -3.1   |
| 8'                                            | (10)  | A'...A                   | O6'...C3                                                                                                                                         | 1/2+x,1/2-y,z       | 2.855                                                                                  | -2.4   |
| 9'                                            | (11)  | A'...A                   | O12'...O17<br>O12'...O19                                                                                                                         | -x,1-y,-1/2+z       | 2.872<br>2.974                                                                         | -0.6   |
| 10'                                           | (12)  | A'...A                   | O3'...O2                                                                                                                                         | x,y,z               | 3.083                                                                                  | -0.4   |
| 11'                                           | (13)  | A'...A                   | O7'...O9                                                                                                                                         | x,-1+y,z            | 2.924                                                                                  | -0.1   |
| 12'                                           | (5'') | A'...A''                 | O11'...C4''<br>O14'...O17''<br>O17'...O14''<br>O18'...N1''<br>N1'...O18''<br>N1'...C3''<br>C1'...C2''<br>C2'...C1''<br>C3'...N1''<br>C4'...O11'' | -1/2+x,1/2-y,z      | 3.124<br>2.818<br>2.827<br>2.997<br>2.991<br>3.225<br>3.129<br>3.125<br>3.217<br>3.152 | -10.4  |
| 13'                                           | (6'') | A'...A''                 | O2'...O17''<br>O2'...O19''<br>O9'...O7''<br>O14'...O16''<br>N9'...O16''                                                                          | x,y,z               | 2.952<br>2.987<br>2.934<br>3.015<br>2.958                                              | -8.4   |
| 14'                                           | (7'') | A'...A''                 | O7'...O9''<br>O17'...O2''<br>O19'...O2''                                                                                                         | x,-1+y,z            | 3.034<br>2.963<br>2.982                                                                | -7.1   |
| 15'                                           | (8'') | A'...A''                 | O5'...O21''<br>O5'...N12''<br>O20'...O5''<br>N12'...O5''                                                                                         | 1/2+x,1/2-y,z       | 2.975<br>2.955<br>2.946<br>2.931                                                       | -4.5   |
| Sum of all interaction energies of molecule A |       |                          |                                                                                                                                                  |                     |                                                                                        | -58.6  |

\* Numbers of entries correspond to numbers of neighbouring molecules in Figure 1S

\*\* Numbers of entries given in the second column in parentheses correspond to the equivalent interactions from Tables 2S and 4S

**Table 4S.** Pair intermolecular interaction energies (kcal/mol) and shortened contacts (Å) of molecule A'' of compound **16** with its closest environment in the crystal obtained at M052X/6-311G(df,pd) level of approximation

| Entry*                                        | No**  | Type of pair interaction | Shortened contact                                                                                                                                | Symmetry code       | Distance                                                                               | Energy |
|-----------------------------------------------|-------|--------------------------|--------------------------------------------------------------------------------------------------------------------------------------------------|---------------------|----------------------------------------------------------------------------------------|--------|
| 1''                                           | –     | A''...A''                | O10''...O14''<br>C2''...O14''                                                                                                                    | -1/2+x,1.5-y,z      | 3.000<br>2.998                                                                         | -7.5   |
| 2''                                           | –     | A''...A''                | O14''...O10''<br>O14''...C2''                                                                                                                    | ½+x,1.5-y,z         | 3.000<br>2.998                                                                         | -7.5   |
| 3''                                           | –     | A''...A''                | O20''...O19''                                                                                                                                    | -1/2+x,1/2-y,z      | 3.049                                                                                  | -0.4   |
| 4''                                           | –     | A''...A''                | O19''...O20''                                                                                                                                    | ½+x,1/2-y,z         | 3.049                                                                                  | -0.4   |
| 5''                                           | (12') | A''...A'                 | O11''...C4'<br>O14''...O17'<br>O17''...O14'<br>O18''...N1'<br>N1''...O18'<br>N1''...C3'<br>C1''...C2'<br>C2''...C1'<br>C3''...N1'<br>C4''...O11' | ½+x,1/2-y,z         | 3.152<br>2.827<br>2.818<br>2.991<br>2.997<br>3.217<br>3.125<br>3.129<br>3.225<br>3.124 | -10.4  |
| 6''                                           | (13') | A''...A'                 | O17''...O2'<br>O19''...O2'<br>O7''...O9'<br>O16''...O14'<br>O16''...N9'                                                                          | x,y,z               | 2.952<br>2.987<br>2.934<br>3.015<br>2.958                                              | -8.4   |
| 7''                                           | (14') | A''...A'                 | O9''...O7'<br>O2''...O17'<br>O2''...O19'                                                                                                         | x,1+y,z             | 3.034<br>2.963<br>2.982                                                                | -7.1   |
| 8''                                           | (15') | A''...A'                 | O5''...O20'<br>O5''...N12'<br>O21''...O5'<br>N12''...O5'                                                                                         | -1/2+x,1/2-y,z      | 2.946<br>2.931<br>2.975<br>2.955                                                       | -4.5   |
| 9''                                           | (14)  | A''...A                  | O3''...N3<br>O3''...C1<br>O6''...N1<br>O6''...C2                                                                                                 | 1-x,1-y,-1/2+z      | 3.064<br>3.158<br>2.842<br>2.920                                                       | -5.4   |
| 10''                                          | (15)  | A''...A                  | O21''...O11<br>O21''...N8                                                                                                                        | x,y,z               | 2.969<br>2.966                                                                         | -4.0   |
| 11''                                          | (16)  | A''...A                  | O21''...O5                                                                                                                                       | 1/2+x,1/2-y,z       | 2.860                                                                                  | -1.3   |
| 12''                                          | (17)  | A''...A                  | O7''...O19<br>O7''...O21                                                                                                                         | 1/2-x,-1/2+y,-1/2+z | 2.836<br>2.941                                                                         | -1.1   |
| 13''                                          | (18)  | A''...A                  | O2''...O7                                                                                                                                        | 1/2-x,1/2+y,-1/2+z  | 2.875                                                                                  | -1.0   |
| 14''                                          | (19)  | A''...A                  | O12''...O11                                                                                                                                      | ½+x,1.5-y,z         | 2.989                                                                                  | -0.8   |
| 15''                                          | (20)  | A''...A                  | O5''...O17                                                                                                                                       | -x,1-y,-1/2+z       | 3.038                                                                                  | -0.5   |
| Sum of all interaction energies of molecule A |       |                          |                                                                                                                                                  |                     |                                                                                        | -58.3  |

\* Numbers of entries correspond to numbers of neighbouring molecules in Figure 1S

\*\* Numbers of entries given in the second column in parentheses correspond to the equivalent interactions from Tables 2S and 3S

**Table 5S.** Pair intermolecular interaction energies (kcal/mol) and shortened contacts (Å) of molecule of compound **21** with its closest environment in the crystal obtained at M052X/6-311G(df,pd) level of approximation

| Entry | Shortened contact | Symmetry Code | Distance | Energy |
|-------|-------------------|---------------|----------|--------|
| 1     | N2...N10          | 3-x,2-y,1-z   | 2.956    | -16.6  |
|       | N2...H2           |               | 2.107    |        |
|       | N10...N2          |               | 2.956    |        |
|       | H2...N2           |               | 2.107    |        |
| 2     | O10...N3          | 2-x,2-y,1-z   | 3.135    | -11.2  |
|       | N3...O10          |               | 3.135    |        |
|       | O9...N10          |               | 3.109    |        |
|       | N10...O9          |               | 3.109    |        |
| 3     | O4...O2           | 1-x,2-y,-z    | 2.941    | -7.4   |
|       | O2...O4'          |               | 2.761    |        |
|       | N4...O4'          |               | 3.094    |        |
|       | O6...O11          |               | 3.106    |        |
|       | O11...O6          |               | 3.106    |        |
|       | O2...N1           |               | 3.061    |        |
|       | N1...O2           |               | 3.061    |        |
| 4     | O4...C1           | 2-x,2-y,-z    | 3.240    | -6.6   |
|       | O4...O4'          |               | 3.079    |        |
|       | O5...N2           |               | 3.113    |        |
|       | O5...C2           |               | 3.053    |        |
|       | O5...C3           |               | 3.319    |        |
|       | N2...O5           |               | 3.113    |        |
|       | C2...O5           |               | 3.053    |        |
|       | C3...O5           |               | 3.319    |        |
|       | O7...O11          |               | 3.014    |        |
|       | O11...O7          |               | 3.014    |        |
| 5     | O3...H4A          | -1+x,y,z      | 2.491    | -3.8   |
|       | O14...O8          |               | 3.076    |        |
|       | O14...O11         |               | 2.987    |        |
|       | O14...O12         |               | 3.076    |        |
|       | O14...N8          |               | 2.933    |        |
| 6     | O8...O14          | 1+x,y,z       | 3.076    | -3.8   |
|       | O11...O14         |               | 2.987    |        |
|       | O12...O14         |               | 3.076    |        |
|       | N8...O14          |               | 2.933    |        |
|       | H4A...O3          |               | 2.491    |        |
| 7     | O11...O6          | x,-1+y,z      | 3.106    | -2.9   |
|       | O13...O3          |               | 2.980    |        |
| 8     | O3...O13          | x,1+y,z       | 2.980    | -2.9   |
|       | O6...O11          |               | 3.106    |        |
| 9     | O13...O7          | -1+x,-1+y,z   | 3.083    | -2.3   |
| 10    | O7...O13          | 1+x,1+y,z     | 3.083    | -2.3   |
| 11    | O6...O7           | 2-x,3-y,-z    | 3.050    | -0.4   |
|       | O7...O6           |               | 3.050    |        |
|       | O7...O7           |               | 3.064    |        |
| 12    | O9...O9           | 1-x,1-y,1-z   | 2.811    | -0.1   |
|       | O9...O13          |               | 3.043    |        |
|       | O13...O9          |               | 3.043    |        |
| 13    | O10...O12         | 2-x,1-y,1-z   | 3.144    | -0.1   |
|       | O12...O10         |               | 3.144    |        |

**Table 6S.** Pair intermolecular interaction energies (kcal/mol) and shortened contacts (Å) of molecule of compound **20** with its closest environment in the crystal obtained at M052X/6-311G(df,pd) and M052X/aug-cc-pvdz levels of approximation<sup>a</sup>.

| Entry | Shortened contact | Symmetry Code    | Distance | Energy <sup>b</sup> | Energy <sup>c</sup> | Comment          |
|-------|-------------------|------------------|----------|---------------------|---------------------|------------------|
| 1     | O8...N2           | 1-x,1-y,-z       | 2.822    | -10.5               | -10.3               | Inside the layer |
|       | O8...H2           |                  | 1.963    |                     |                     |                  |
|       | N2...O8           |                  | 2.822    |                     |                     |                  |
|       | H2...O8           |                  | 1.963    |                     |                     |                  |
| 2     | O8...O3           | x,1/2-y,-1/2+z   | 3.138    | -9.3                | -9.2                | Inside the layer |
|       | N2...O3           |                  | 3.141    |                     |                     |                  |
|       | C2...O3           |                  | 2.862    |                     |                     |                  |
|       | O9...N1           |                  | 2.763    |                     |                     |                  |
| 3     | O9...H1           | x,1/2-y,1/2+z    | 1.912    | -9.3                | -9.2                | Inside the layer |
|       | O3...O8           |                  | 3.138    |                     |                     |                  |
|       | O3...N2           |                  | 3.141    |                     |                     |                  |
|       | O3...C2           |                  | 2.862    |                     |                     |                  |
| 4     | N1...O9           | x,-1/2-y,-1/2+z  | 2.763    | -8.1                | -7.9                | Inside the layer |
|       | H1...O9           |                  | 1.912    |                     |                     |                  |
|       | O4...O6           |                  | 3.090    |                     |                     |                  |
|       | O9...C4           |                  | 3.314    |                     |                     |                  |
| 5     | O9...H4A          | x,-1/2-y,1/2+z   | 2.344    | -8.1                | -7.9                | Inside the layer |
|       | N3...O3           |                  | 3.149    |                     |                     |                  |
|       | O3...N3           |                  | 3.149    |                     |                     |                  |
|       | O6...O4           |                  | 3.090    |                     |                     |                  |
| 6     | C4...O9           | 1-x,-y,-z        | 3.314    | -5.9                | -5.9                | Inside the layer |
|       | H4A...O9          |                  | 2.344    |                     |                     |                  |
|       | O9...C3           |                  | 3.247    |                     |                     |                  |
|       | C3...O9           |                  | 3.247    |                     |                     |                  |
| 7     | C3...C3           | 1-x,-1/2+y,1/2-z | 3.488    | -3.7                | -3.7                | Inside the layer |
|       | O1...O8           |                  | 3.041    |                     |                     |                  |
|       | N1...O8           |                  | 2.959    |                     |                     |                  |
|       | C1...O8           |                  | 2.966    |                     |                     |                  |
| 8     | O8...O1           | 1-x,1/2+y,1/2-z  | 3.041    | -3.7                | -3.7                | Inside the layer |
|       | O8...N1           |                  | 2.959    |                     |                     |                  |
|       | O8...C1           |                  | 2.966    |                     |                     |                  |
|       | O2...O5           | -x,-y,1-z        | 2.904    | -2.1                | -2.0                | Between layers   |
| 9     | O5...O2           |                  | 2.904    |                     |                     |                  |
|       | O5...O6           |                  | 3.092    |                     |                     |                  |
|       | O5...N4           |                  | 3.117    |                     |                     |                  |
| 10    | O6...O5           | -x,-1/2+y,1/2-z  | 3.092    | -1.8                | -1.9                | Between layers   |
|       | N4...O5           |                  | 3.117    |                     |                     |                  |
|       | O5...O4           |                  | 3.118    |                     |                     |                  |
|       | O7...O5           |                  | 2.956    |                     |                     |                  |
| 11    | O4...O5           | -x,1/2+y,1/2-z   | 3.118    | -1.8                | -1.9                | Between layers   |
|       | O5...O7           |                  | 2.956    |                     |                     |                  |
|       | O7...O2           |                  | 3.095    |                     |                     |                  |
|       | O2...O7           |                  | 3.095    |                     |                     |                  |
| 12    | O6...O6           | -x,-1-y,1-z      | 3.139    | -0.1                | -0.2                | Between layers   |
|       | O6...O6           |                  | 3.139    |                     |                     |                  |
|       | O6...O6           |                  | 3.139    |                     |                     |                  |
|       | O6...O6           |                  | 3.139    |                     |                     |                  |

<sup>a</sup> in columns 5 and 6, energy obtained at M052X/6-311G(df,pd) and M052X/aug-cc-pvdz levels, respectively; it is seen that differences in energies do not exceed 0.2 kcal/mol

**Table 7S.** List of selected energetic aliphatic trinitroethoxy compounds studied by X-ray crystallography.

| Entry | Compound | Density/T <sup>a</sup> | Density <sup>b</sup> |
|-------|----------|------------------------|----------------------|
| 1     |          | 1.839/100              | 1.777                |
| 2     |          | 1.975/100              | 1.908                |
| 3     |          | 1.922/173              | 1.881                |
| 4     |          | 1.815/173              | 1.776                |
| 5     |          | 1.839/173              | 1.799                |
| 6     |          | 1.729/243              | 1.712                |
| 7     |          | 1.899/173              | 1.858                |
| 8     |          | 1.844 <sup>b</sup>     | 1.813                |
| 9     |          | 1.938 <sup>b</sup>     | 1.905                |

<sup>a</sup> Density (g/cm<sup>3</sup>) calculated from X-ray data at experimental temperature.

<sup>b</sup> Density (g/cm<sup>3</sup>) recalculated at room temperature for easily comparison; recalculation was carried out based on data from Tables 10s and 11S, and our recent X-ray studies on polynitro compounds and high nitrogen heterocycles at 100K and room temperature [Refs. 2c, 2p from main text, and Sheremetev, A. B.; Aleksandrova, N. S.; Suponitsky, K. Yu.; Antipin M. Yu.; Tartakovsky, V. A. *Mendeleev Commun.*, **2010**, 20, 249-252; Vatsadze, I. A.; Serushkina, O. V.; Dutov, M. D.; Shkineva, T. K.; Suponitsky, K. Yu.; Ugrak, B. I.; Dalinger, I. L. *Chem. Heterocycl. Comp.*, **2015**, 51, 695-703]. It appears that decrease of density from 100 to 298K

vary in narrow range (3-4%). Densities were recalculated using 3.5% as average value in assumption of linear dependence of density vs. temperature ( $d_T = -kT+b$ ).

<sup>c</sup> There are two polymorphs. Only the densest polymorph is taken into consideration. For entry 8, density of the second polymorph is 1.778 g/cm<sup>3</sup> at 200K. For entry 9, density of the second polymorph is 1.808 g/cm<sup>3</sup> at 258K.

A replacement at the carbonyl core of one trinitroethoxy moiety with amino group or substituted amino group leads to a reduction in density (compare entry 2 with entries 4-7). Compound from entry 7 which form strongly H-bonded dimers (as in the case of compound **21**) have greatest density among these amides and contain four independent molecules in the asymmetric unit cell. Dramatic changes in density is also observed for ethers bearing four or two trinitroethoxy moieties at the one-carbon core, respectively (compare entries 8 and 9).

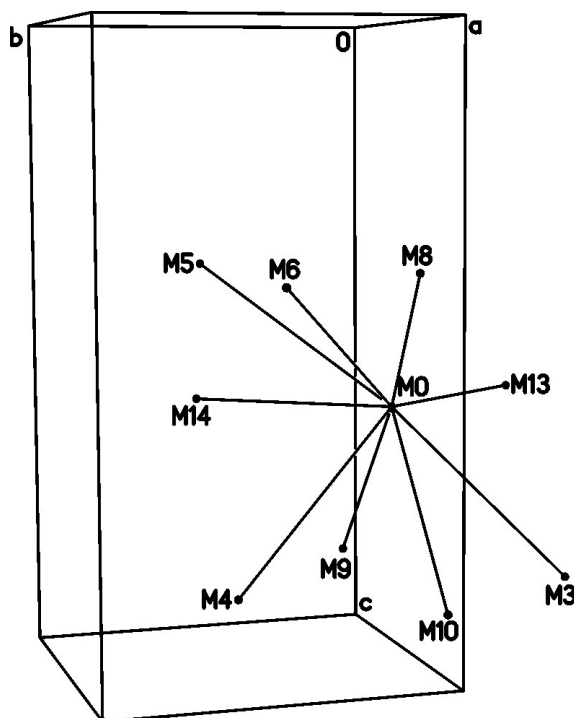

**Figure 3S.** Intermolecular interaction pattern of the central molecule of *bis*(2,2,2-trinitroethyl) carbonate (see, table 1, entry 2). Environment is presented as small circles; the central molecule is denoted as M0; numbering of the environment corresponds to numbering in Table 8S; only neighbours with interaction energy higher than 2 kcal/mol are shown.

**Table 8S.** Pair intermolecular interaction energies (kcal/mol) and shortened contacts (Å) of *bis*(2,2,2-trinitroethyl) carbonate molecule with its closest environment in the crystal obtained at M052X/6-311G(df,pd) level of approximation.

| Entry | Shortened contact | Symmetry Code    | Distance | Energy |
|-------|-------------------|------------------|----------|--------|
| 1     | O5...N6           | 1/2-x,-y,-1/2+z  | 2.994    | -1.2   |
|       | O5...O14          |                  | 2.863    |        |
|       | O5...O15          |                  | 2.942    |        |
|       | O8...O13          |                  | 2.942    |        |
| 2     | N6...O5           | 1/2-x,-y,1/2+z   | 2.994    | -1.2   |
|       | O13...O8          |                  | 2.942    |        |
|       | O14...O5          |                  | 2.863    |        |
|       | O15...O5          |                  | 2.942    |        |
| 3     | O12...O15         | 1-x,-1/2+y,1.5-z | 2.993    | -4.4   |
| 4     | O15...O12         | 1-x,1/2+y,1.5-z  | 2.993    | -4.4   |
| 5     | O8...C2           | -1/2+x,1/2-y,1-z | 3.079    | -2.2   |
|       | O8...O1           |                  | 3.046    |        |
| 6     | C2...O8           | 1/2+x,1/2-y,1-z  | 3.079    | -2.2   |
|       | O1...O8           |                  | 3.046    |        |
| 7     | O5...O6           | -x,-y,1-z        | 2.957    | -0.9   |
|       | O6...O5           |                  | 2.957    |        |
|       | O6...O6           |                  | 3.070    |        |
| 8     | H2...O1           | 1-x,-y,1-z       | 2.447    | -10.6  |
|       | C2...O1           |                  | 3.260    |        |
|       | N1...O1           |                  | 3.000    |        |
|       | O1...H2           |                  | 2.447    |        |
|       | O1...C2           |                  | 3.260    |        |
|       | O1...N1           |                  | 3.000    |        |
|       | O1...O5           |                  | 3.068    |        |
|       | O5...O1           |                  | 3.068    |        |
| 9     | O2...O11          | -1/2+x,y,1.5-z   | 3.027    | -4.7   |
|       | O3...O11          |                  | 2.985    |        |
|       | O7...O11          |                  | 3.072    |        |
|       | O14...N4          |                  | 3.104    |        |
|       | O14...O12         |                  | 2.838    |        |
| 10    | N4...O14          | 1/2+x,y,1.5-z    | 3.104    | -4.7   |
|       | O11...O2          |                  | 3.027    |        |
|       | O11...O3          |                  | 2.985    |        |
|       | O11...O7          |                  | 3.072    |        |
|       | O12...O14         |                  | 2.838    |        |
| 11    | O9...O15          | x,1/2-y,-1/2+z   | 3.075    | -0.1   |
| 12    | O15...O9          | x,1/2-y,1/2+z    | 3.075    | -0.1   |
| 13    | O4...N3           | 1/2-x,-1/2+y,z   | 3.012    | -5.3   |
|       | O4...O7           |                  | 2.832    |        |
|       | O4...O8           |                  | 3.093    |        |
| 14    | N3...O4           | 1/2-x,1/2+y,z    | 3.012    | -5.3   |
|       | O7...O4           |                  | 2.832    |        |
|       | O8...O4           |                  | 3.093    |        |



## Description of the crystal packing of cyanuric acid

In order to find the reasons for lower density of the crystal structure of cyanuric acid in comparison to 1,3,5-triazines **16**, **20**, **21**, we have investigated crystal structure of cyanuric acid in the same way as done for the triazines (using combination of geometrical and energetic approaches). In the case of cyanuric acid, visual analysis coincides with a description based on pair intermolecular energies (Table 9S).

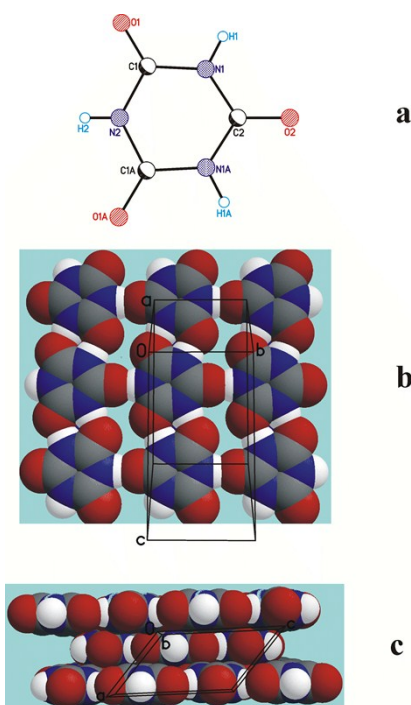

**Figure 4S.** General view of the molecule (a), and crystal packing fragments of cyanuric acid. Atoms are presented as spheres of van-der-Waals radius (C: 1.75; N: 1.61; O: 1.58; H: 1.2 Å; Rowland, R.S.; Taylor, R. *J. Phys. Chem.*, **1996**, *100*, 7384-7391). b) H-bonded layers, projection onto *bc* crystallographic plane; c) projection onto *ac* crystallographic plane.

By means of strong H-bonds, molecules are assembled into the layers parallel to the *bc* crystallographic plane (Fig. 4Sb) while connection between layers is provided by  $\pi\cdots\pi$  stacking interactions (Fig. 4Sc). The former interactions are stronger than the latter ones, therefore energy inside the layer is higher (37.4 kcal/mol, M1, M2, M3, M4, M13, M14) than that between the layers (-19.4 kcal/mol, M5-M12). Nevertheless the stacking interactions are still significantly stronger than nitro...nitro interactions observed in trinitroethoxy triazines. Therefore crystal structure of cyanuric acid is stabilized by strong interactions in all three directions. Why its density is lower than that of trinitroethoxy triazines? An answer to this question can be obtained by a quick glance at Figure 4S. Due to strong H-bonding interactions and their directionality, molecules in H-bonded layer (Figure 4Sb) are arranged so that layers contain voids (strong intermolecular bonding restricts molecular freedom of movement). In perpendicular direction, as stated above, intermolecular interactions are weaker, and molecules are packed more densely (no voids observed in Figure 4Sc). However intralayer voids cannot be filled with atoms of the adjacent layers that leads to lower density of cyanuric acid in comparison to trinitroethoxy triazines.

**Table 9S.** Pair intermolecular interaction energies (kcal/mol) and shortened contacts (Å) of cyanuric acid with its closest environment in the crystal obtained at M052X/6-311G(df,pd) level of approximation.

| Entry | Shortened contact | Symmetry Code        | Distance | Energy | Comment          |
|-------|-------------------|----------------------|----------|--------|------------------|
| 1     | N1...O1           | $1/2-x, 1/2-y, -z$   | 2.814    | -12.2  | Inside the layer |
|       | O1...N1           |                      | 2.814    |        |                  |
|       | O1...H1           |                      | 1.806    |        |                  |
|       | H1...O1           |                      | 1.806    |        |                  |
| 2     | N1B...O1B         | $1/2-x, 1/2-y, 1-z$  | 2.814    | -12.2  | Inside the layer |
|       | H1B...O1B         |                      | 1.806    |        |                  |
|       | O1B...N1B         |                      | 2.814    |        |                  |
|       | O1B...H1B         |                      | 1.806    |        |                  |
| 3     | N2...O2           | $x, -1+y, z$         | 2.780    | -6.4   | Inside the layer |
|       | H2...O2           |                      | 1.770    |        |                  |
| 4     | O2...N2           | $x, 1+y, z$          | 2.780    | -6.4   | Inside the layer |
|       | O2...H2           |                      | 1.770    |        |                  |
| 5     | C1...C1           | $-x, -y, -z$         | 3.367    | -4.1   | Between layers   |
|       | C1...O1           |                      | 2.978    |        |                  |
|       | N2...O1           |                      | 3.125    |        |                  |
|       | O1...C1           |                      | 2.978    |        |                  |
|       | O1...N2           |                      | 3.125    |        |                  |
|       | O1...O1           |                      | 3.065    |        |                  |
| 6     | N2...O1B          | $1-x, -y, 1-z$       | 3.125    | -4.1   | Between layers   |
|       | C1B...C1B         |                      | 3.367    |        |                  |
|       | C1B...O1B         |                      | 2.978    |        |                  |
|       | O1B...N2          |                      | 3.125    |        |                  |
|       | O1B...C1B         |                      | 2.978    |        |                  |
|       | O1B...O1B         |                      | 3.065    |        |                  |
| 7     | C1B...O2          | $-1/2+x, -1/2+y, z$  | 3.243    | -2.6   | Between layers   |
|       | O1B...C2          |                      | 3.059    |        |                  |
|       | O1B...O2          |                      | 3.046    |        |                  |
| 8     | C2...O1           | $-1/2+x, 1/2+y, z$   | 3.059    | -2.6   | Between layers   |
|       | O2...C1           |                      | 3.243    |        |                  |
|       | O2...O1           |                      | 3.046    |        |                  |
| 9     | C1...O2           | $1/2+x, -1/2+y, z$   | 3.243    | -2.6   | Between layers   |
|       | O1...C2           |                      | 3.059    |        |                  |
|       | O1...O2           |                      | 3.046    |        |                  |
| 10    | C2...O1B          | $1/2+x, 1/2+y, z$    | 3.059    | -2.6   | Between layers   |
|       | O2...C1B          |                      | 3.243    |        |                  |
|       | O2...O1B          |                      | 3.046    |        |                  |
| 11    | no close contacts | $-x, 1-y, -z$        | —        | -0.4   | Between layers   |
| 12    | no close contacts | $1-x, 1-y, 1-z$      | —        | -0.4   | Between layers   |
| 13    | no close contacts | $1/2-x, -1/2-y, -z$  | —        | -0.1   | Inside the layer |
| 14    | no close contacts | $1/2-x, -1/2-y, 1-z$ | —        | -0.1   | Inside the layer |

## X-ray crystallography.

Collected data were analyzed by the SAINT и SADABS programs incorporated into APEX2 program package [*APEX2 and SAINT*, Bruker AXS Inc., Madison, Wisconsin, USA, **2009**]. All structures were solved by the direct methods and refined by the full-matrix least-squares procedure against  $F^2$  in anisotropic approximation. Hydrogen atoms were located in the difference Fourier maps and refined in isotropic approximation. The refinement was carried out with the SHELXTL program [Sheldrick, G. M. *Acta Crystallogr.*, **2008**, *A64*, 112-122]. The details of data collection and crystal structures refinement for low-temperature experiments are summarized in Table 10S while those for room-temperature experiments are presented in Table 11S. CCDC (numbers 1434738, 1434739 and 1434740 for compounds **16**, **20**, and **21**, respectively at 100K, and 1436944, 1436945 for compounds **21**, **20** at 298K, respectively) contains the supplementary crystallographic data for this paper. These data can be obtained free of charge via [www.ccdc.cam.ac.uk/data\\_request/cif](http://www.ccdc.cam.ac.uk/data_request/cif).

**Table 10S.** Crystallographic data for low-temperature experiment (298K) for compounds **16**, **21**, and **20**.

|                                                     | <b>16</b>                                                     | <b>21</b>                                                     | <b>20</b>                                                   |
|-----------------------------------------------------|---------------------------------------------------------------|---------------------------------------------------------------|-------------------------------------------------------------|
| Empirical formula                                   | C <sub>9</sub> H <sub>6</sub> N <sub>12</sub> O <sub>21</sub> | C <sub>7</sub> H <sub>6</sub> N <sub>10</sub> O <sub>14</sub> | C <sub>5</sub> H <sub>4</sub> N <sub>6</sub> O <sub>9</sub> |
| Fw                                                  | 618.26                                                        | 454.22                                                        | 292.14                                                      |
| Temperature, K                                      | 100                                                           | 100                                                           | 100                                                         |
| Crystal system                                      | Orthorhombic                                                  | Triclinic                                                     | Monoclinic                                                  |
| Space group                                         | Pna2 <sub>1</sub>                                             | <i>P</i> -1                                                   | <i>P</i> 2 <sub>1</sub> / <i>c</i>                          |
| <i>a</i> , Å                                        | 10.9186(15)                                                   | 6.0315(5)                                                     | 13.2903(13)                                                 |
| <i>b</i> , Å                                        | 17.007(2)                                                     | 11.7427(10)                                                   | 6.6865(7)                                                   |
| <i>c</i> , Å                                        | 35.300(5)                                                     | 11.9923(10)                                                   | 11.6787(12)                                                 |
| $\alpha$ , deg                                      | 90.00                                                         | 101.500(2)                                                    | 90.00                                                       |
| $\beta$ , deg                                       | 90.00                                                         | 101.738(2)                                                    | 93.175(2)                                                   |
| $\gamma$ , deg                                      | 90.00                                                         | 97.607(2)                                                     | 90.00                                                       |
| <i>V</i> , Å <sup>3</sup>                           | 6555.0(15)                                                    | 801.56(12)                                                    | 1036.24(18)                                                 |
| <i>Z</i>                                            | 12                                                            | 2                                                             | 4                                                           |
| $\rho_{\text{calc}}$ , g·cm <sup>-3</sup> (at 100K) | 1.879                                                         | 1.882                                                         | 1.873                                                       |
| $\rho_{\text{calc}}$ , g·cm <sup>-3</sup> (at 298K) | 1.809                                                         | 1.808                                                         | 1.797                                                       |
| F(000)                                              | 3744                                                          | 460                                                           | 592                                                         |
| $\mu$ , mm <sup>-1</sup>                            | 0.188                                                         | 0.183                                                         | 0.181                                                       |
| $\theta$ range, deg.                                | 2.10 – 30.20                                                  | 1.78 – 28.00                                                  | 1.53 – 26.99                                                |
| Reflections collected                               | 80248                                                         | 14710                                                         | 15138                                                       |
| Independent reflections / $R_{\text{int}}$          | 9824/0.1717                                                   | 3862/0.0456                                                   | 2234/0.0482                                                 |
| Completeness to theta $\theta$ , %                  | 99.4                                                          | 100.0                                                         | 99.0                                                        |
| Refined parameters                                  | 1134                                                          | 298                                                           | 189                                                         |
| GOF ( $F^2$ )                                       | 1.041                                                         | 1.058                                                         | 1.141                                                       |
| Reflections with $I > 2\sigma(I)$                   | 6038                                                          | 2834                                                          | 1803                                                        |
| $R_1(F)$ ( $I > 2\sigma(I)$ ) <sup>[a]</sup>        | 0.0792                                                        | 0.0513                                                        | 0.0467                                                      |
| $wR_2(F^2)$ (all data) <sup>[b]</sup>               | 0.2113                                                        | 0.1240                                                        | 0.0944                                                      |
| Largest dif. peak/hole, e·Å <sup>-3</sup>           | 0.553 / -0.487                                                | 0.473 / -0.443                                                | 0.313 / -0.264                                              |

[a]  $R_1 = \sum |F_o - |F_c|| / \sum (F_o)$ . [b]  $wR_2 = (\sum [w(F_o^2 - F_c^2)^2] / \sum [w(F_o^2)^2])^{1/2}$

**Table 11S.** Crystallographic data of room-temperature experiment (298K) for compounds **16**, **21**, and **20**.

|                                                                                       | <b>16*</b>                                                    | <b>21</b>                                                     | <b>20</b>                                                   |
|---------------------------------------------------------------------------------------|---------------------------------------------------------------|---------------------------------------------------------------|-------------------------------------------------------------|
| Formula                                                                               | C <sub>9</sub> H <sub>6</sub> N <sub>12</sub> O <sub>21</sub> | C <sub>7</sub> H <sub>6</sub> N <sub>10</sub> O <sub>14</sub> | C <sub>5</sub> H <sub>4</sub> N <sub>6</sub> O <sub>9</sub> |
| Fw                                                                                    | 618.26                                                        | 454.22                                                        | 292.14                                                      |
| Temperature, K                                                                        | 298                                                           | 298                                                           | 298                                                         |
| Crystal system                                                                        | Orthorhombic                                                  | Triclinic                                                     | Monoclinic                                                  |
| Space group                                                                           | <i>Pna</i> 2 <sub>1</sub>                                     | <i>P</i> -1                                                   | <i>P</i> 2 <sub>1</sub> / <i>c</i>                          |
| <i>a</i> , Å                                                                          | 11.13(2)                                                      | 6.1667(12)                                                    | 13.6640(13)                                                 |
| <i>b</i> , Å                                                                          | 17.05(3)                                                      | 11.796(2)                                                     | 6.7290(6)                                                   |
| <i>c</i> , Å                                                                          | 35.85(7)                                                      | 12.164(2)                                                     | 11.7479(11)                                                 |
| $\alpha$ , deg.                                                                       | 90.00                                                         | 101.234(4)                                                    | 90.00                                                       |
| $\beta$ , deg.                                                                        | 90.00                                                         | 102.649(4)                                                    | 91.804(2)                                                   |
| $\gamma$ , deg.                                                                       | 90.00                                                         | 97.005(4)                                                     | 90.00                                                       |
| <i>V</i> , Å <sup>3</sup>                                                             | 6805(9)                                                       | 834.2(3)                                                      | 1079.63(17)                                                 |
| <i>Z</i>                                                                              | 12                                                            | 2                                                             | 4                                                           |
| $\rho_{\text{calc}}$ , g·cm <sup>-3</sup> (at 298K)                                   | 1.809                                                         | 1.808                                                         | 1.797                                                       |
| <i>F</i> (000)                                                                        | 3744                                                          | 460                                                           | 592                                                         |
| $\mu$ , mm <sup>-1</sup>                                                              |                                                               | 0.176                                                         | 0.174                                                       |
| $\theta$ range, deg.                                                                  |                                                               | 1.76 – 28.00                                                  | 1.49 – 27.00                                                |
| Reflections collected                                                                 |                                                               | 15317                                                         | 16874                                                       |
| Independent reflections / <i>R</i> <sub>int</sub>                                     |                                                               | 4024/0.0551                                                   | 2369/0.0550                                                 |
| Completeness to theta $\theta$ , %                                                    |                                                               | 99.9                                                          | 100.0                                                       |
| Refined parameters                                                                    |                                                               | 298                                                           | 189                                                         |
| <i>GOF</i> ( <i>F</i> <sup>2</sup> )                                                  |                                                               | 1.003                                                         | 1.141                                                       |
| Reflections with <i>I</i> > 2 $\sigma$ ( <i>I</i> )                                   |                                                               | 2143                                                          | 1490                                                        |
| <i>R</i> <sub>1</sub> ( <i>F</i> ) ( <i>I</i> > 2 $\sigma$ ( <i>I</i> )) <sup>a</sup> |                                                               | 0.0584                                                        | 0.0501                                                      |
| <i>wR</i> <sub>2</sub> ( <i>F</i> <sup>2</sup> ) (all data) <sup>b</sup>              |                                                               | 0.1521                                                        | 0.1477                                                      |
| Largest diff. peak/hole, e·Å <sup>-3</sup>                                            |                                                               | 0.250 / -0.239                                                | 0.267 / -0.271                                              |

<sup>a</sup>  $R_1 = \sum |F_o - |F_c|| / \sum (F_o)$ ; <sup>b</sup>  $wR_2 = (\sum [w(F_o^2 - F_c^2)^2] / \sum [w(F_o^2)^2])^{1/2}$

\* quality of the room-temperature X-ray experiment for compound **16** is very low due probably to significant thermal motion and possible disorder of the nitro groups. We have determined only unit cell parameters that allow us to estimate room-temperature crystal packing density

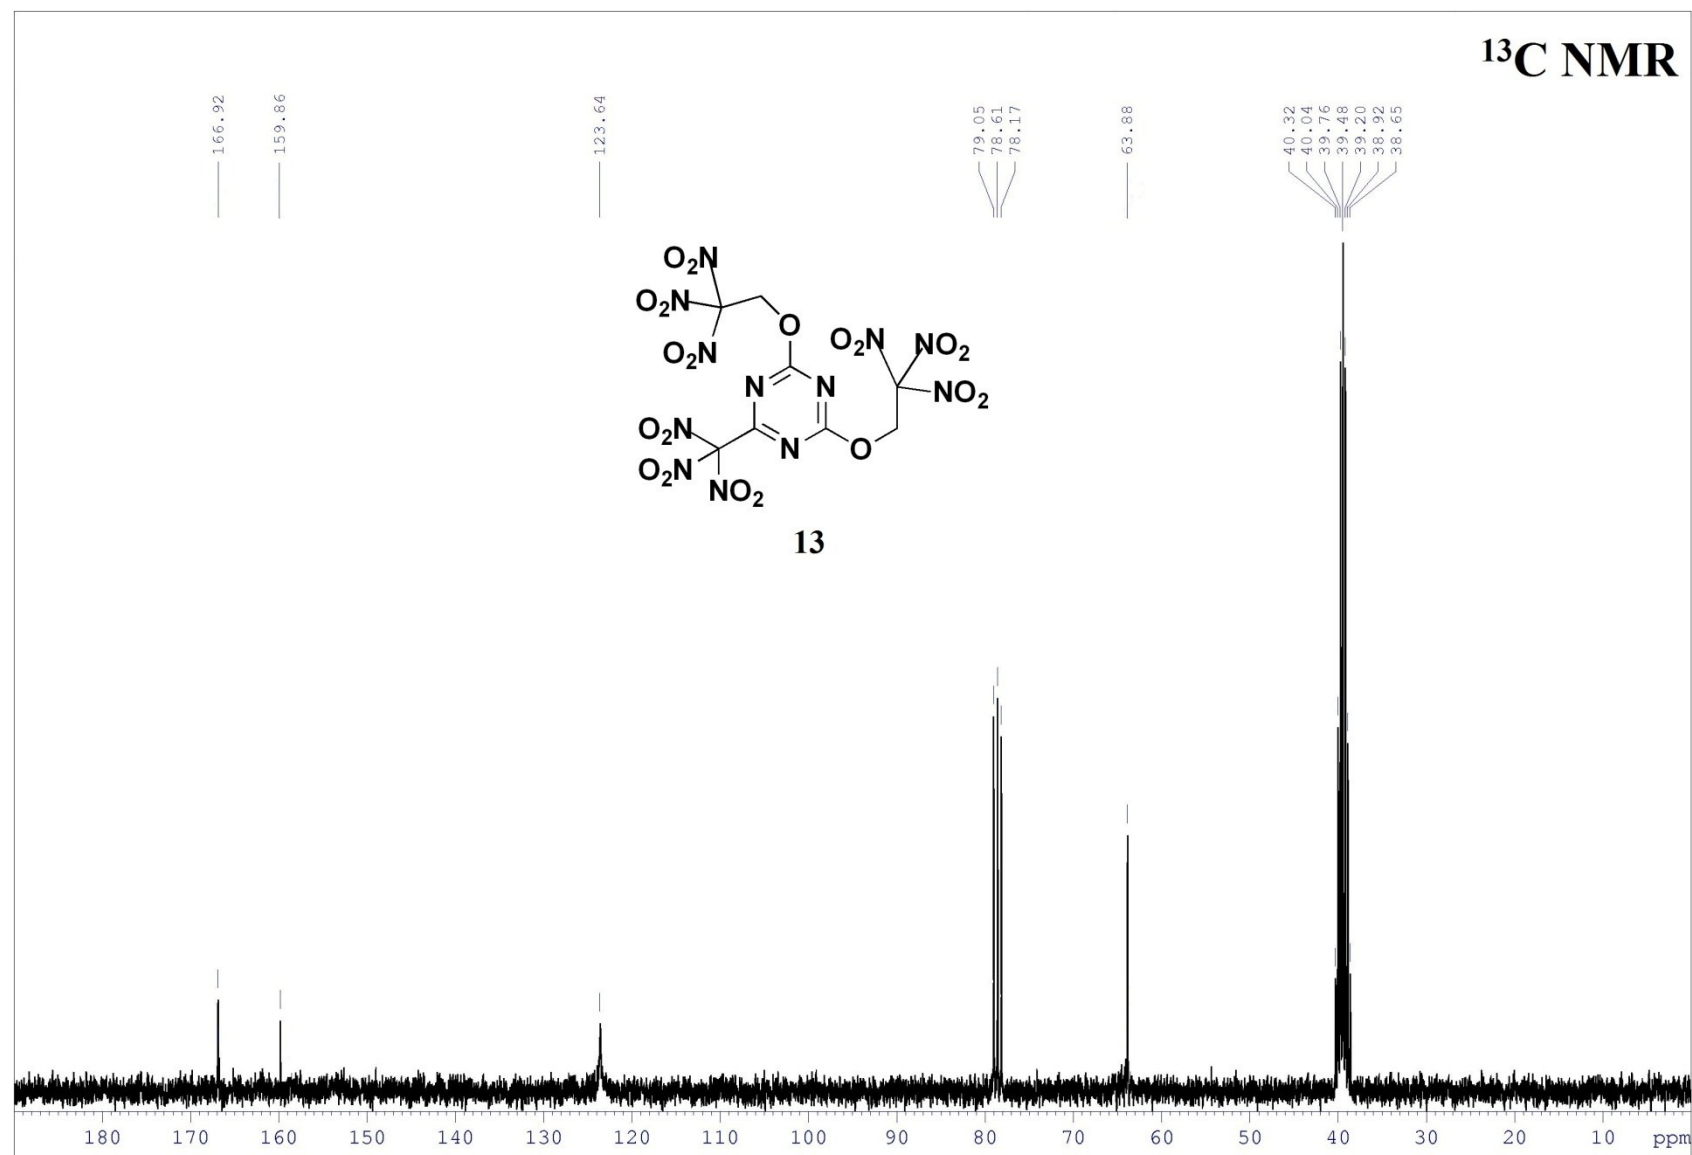

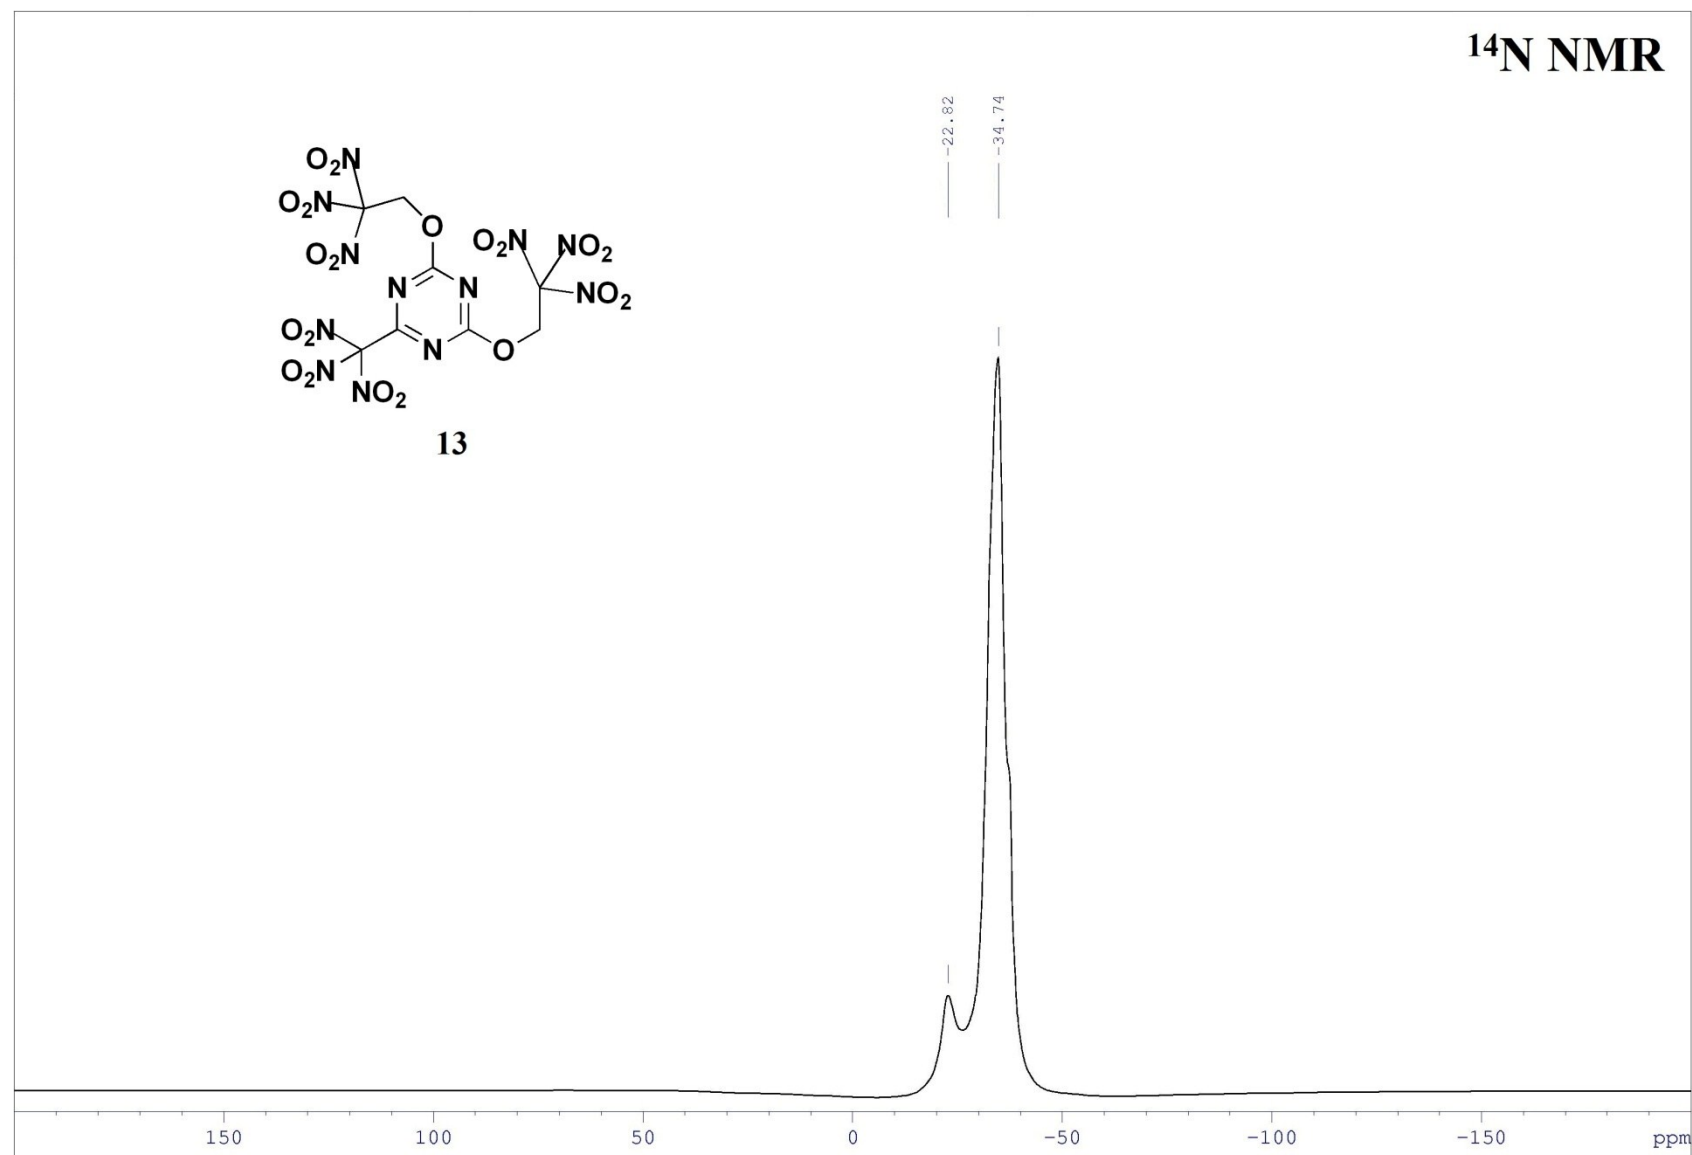

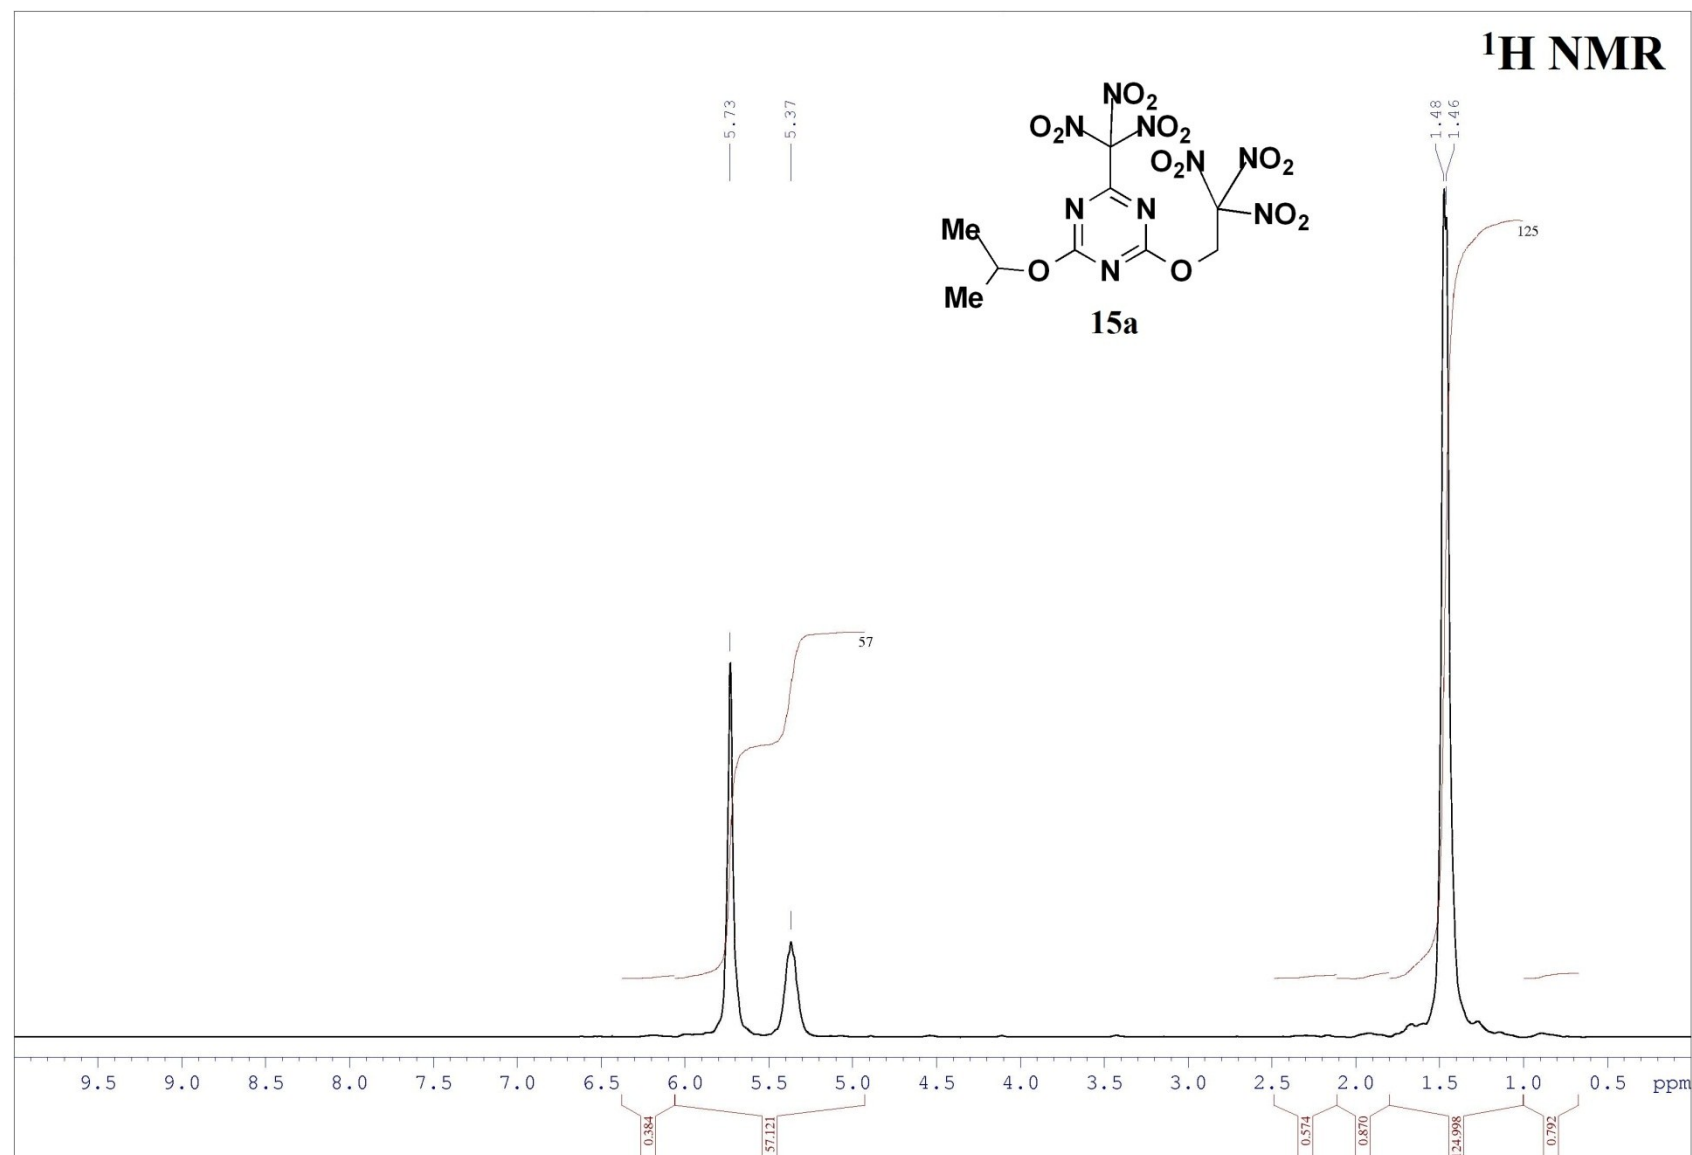



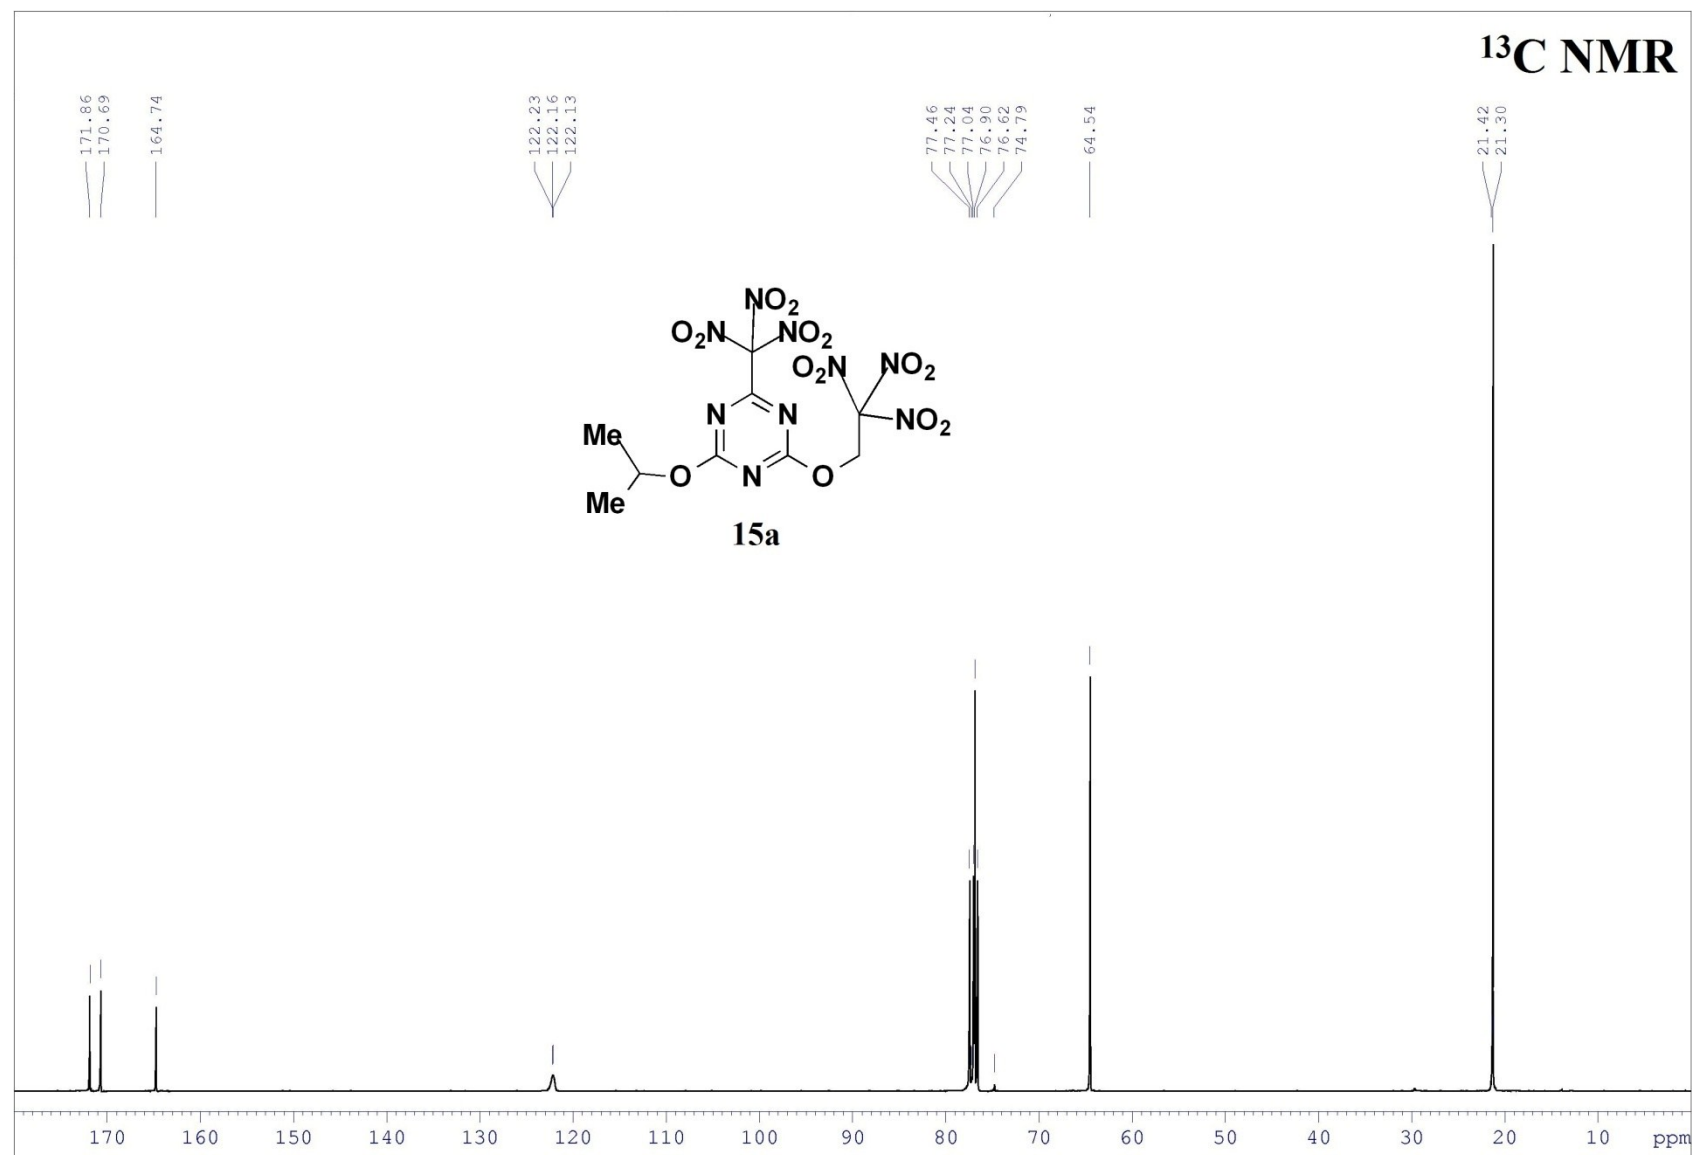

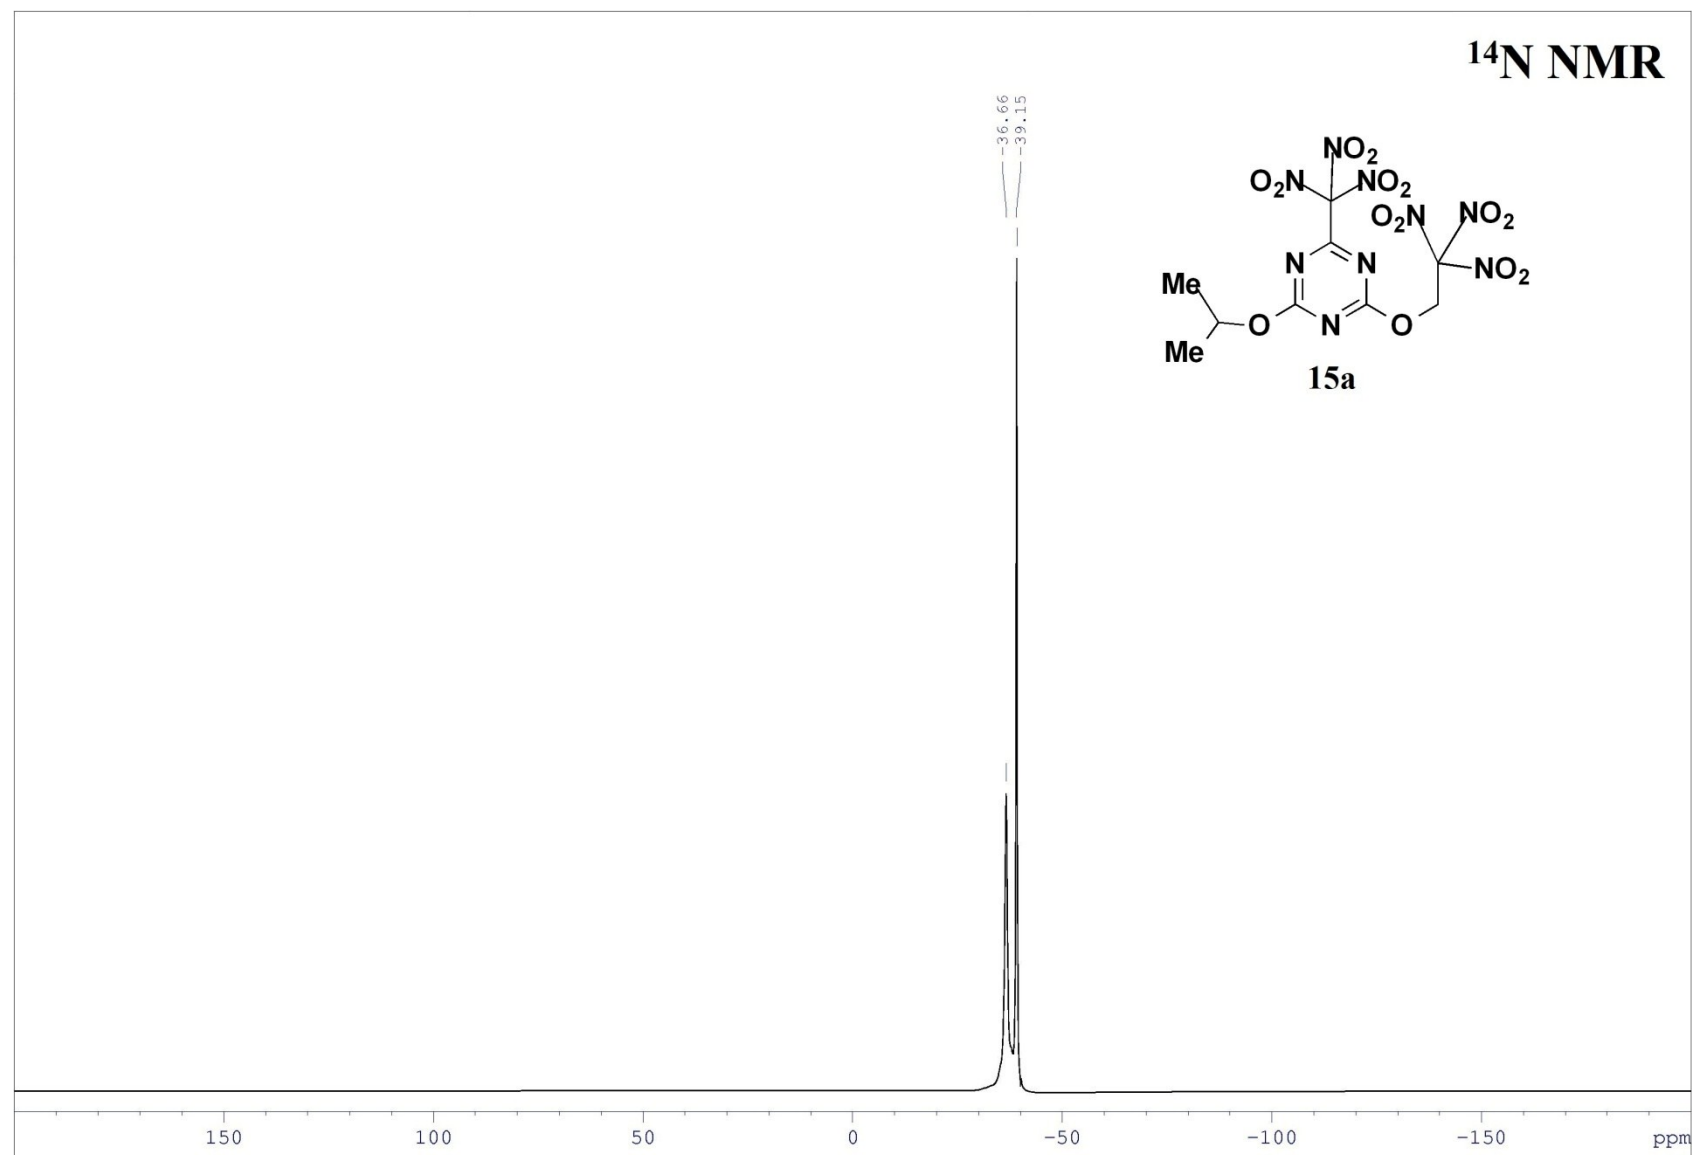

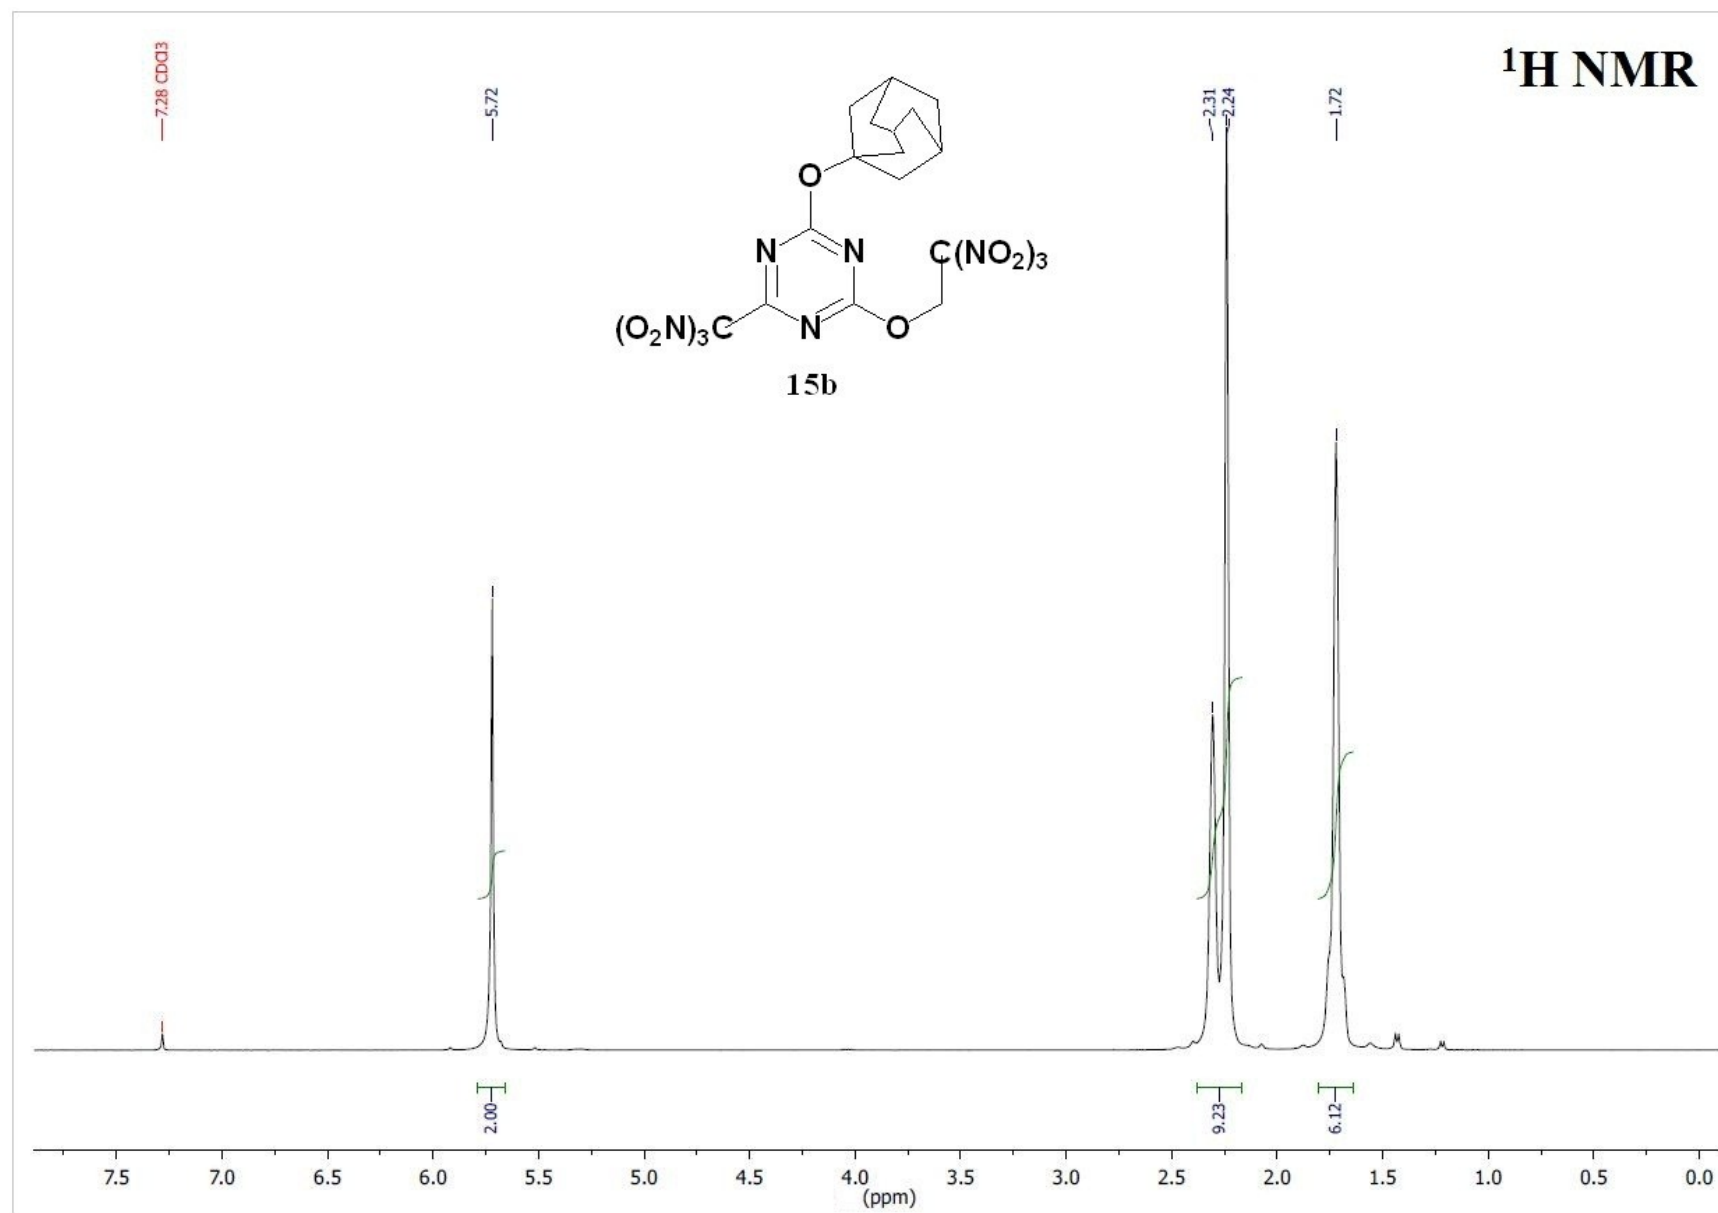

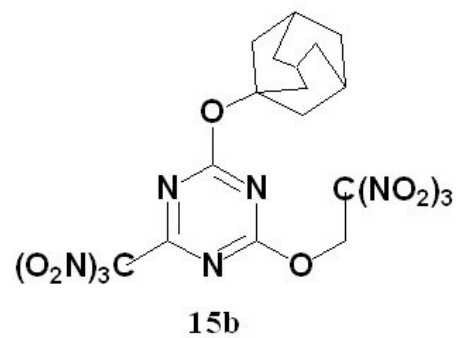

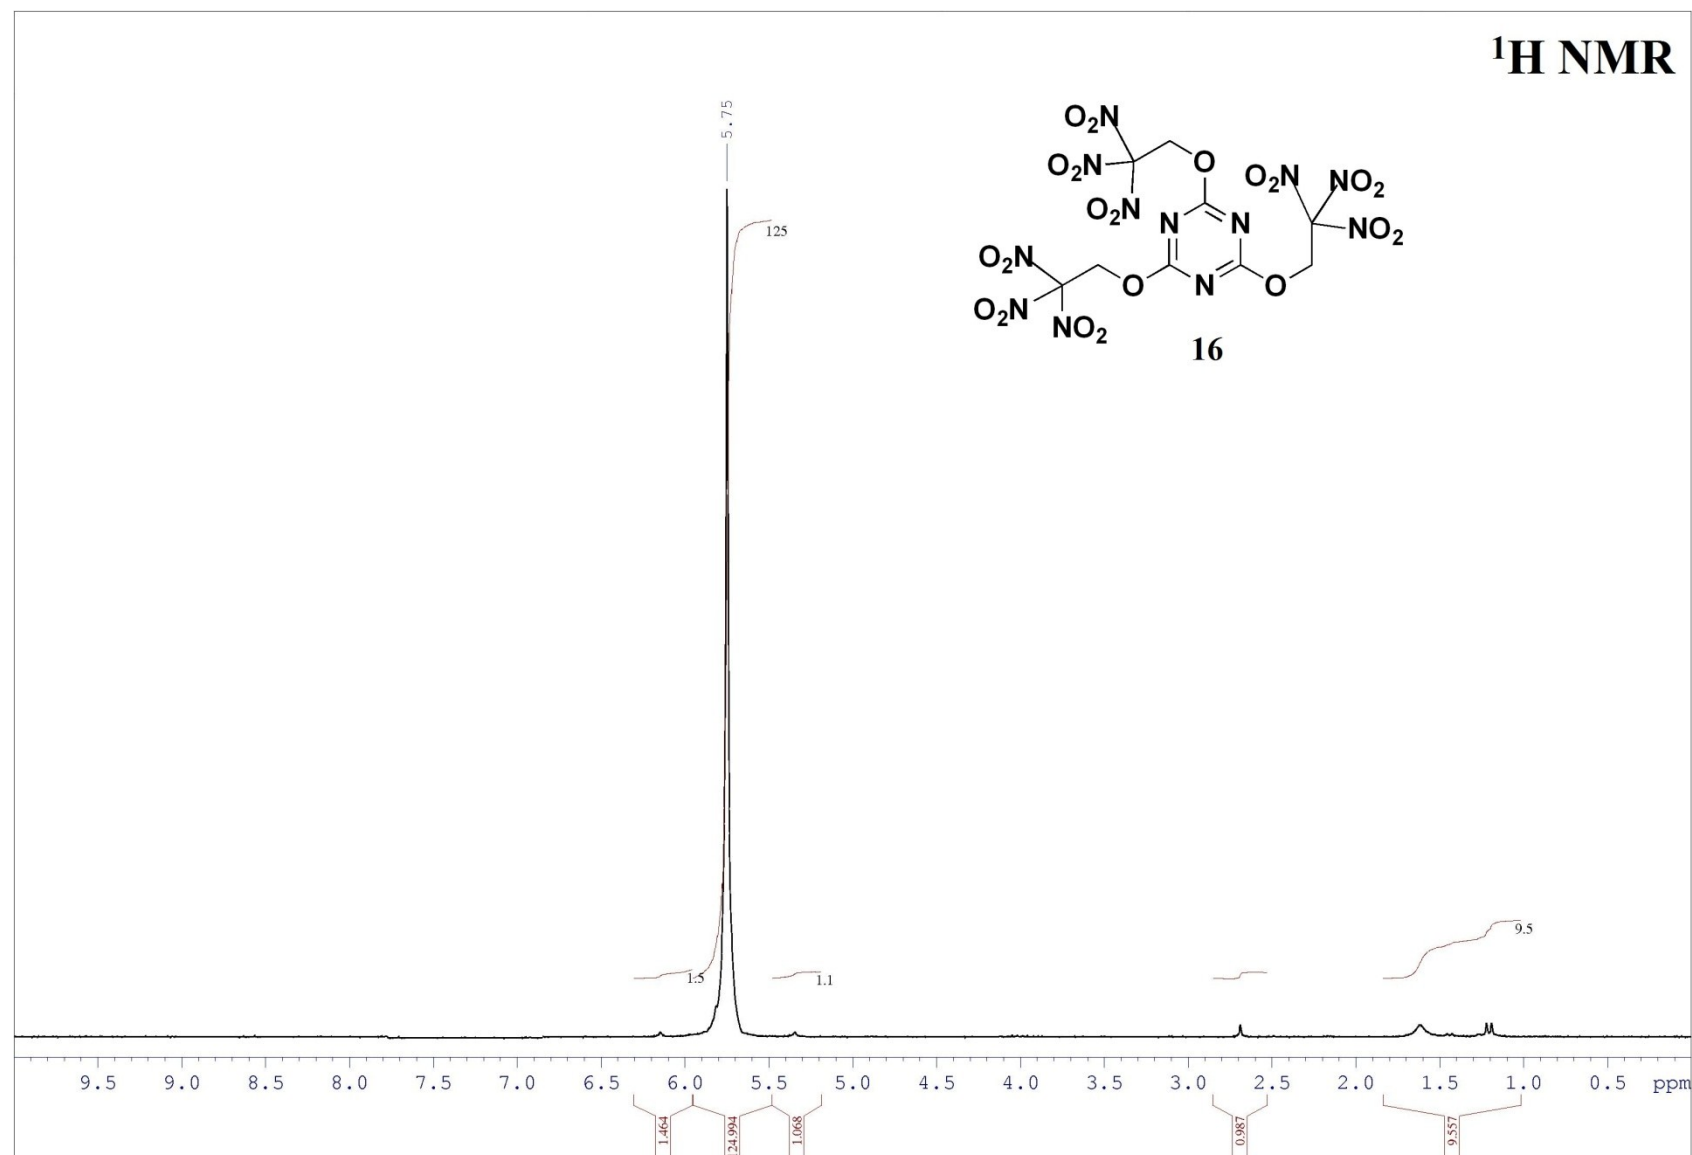

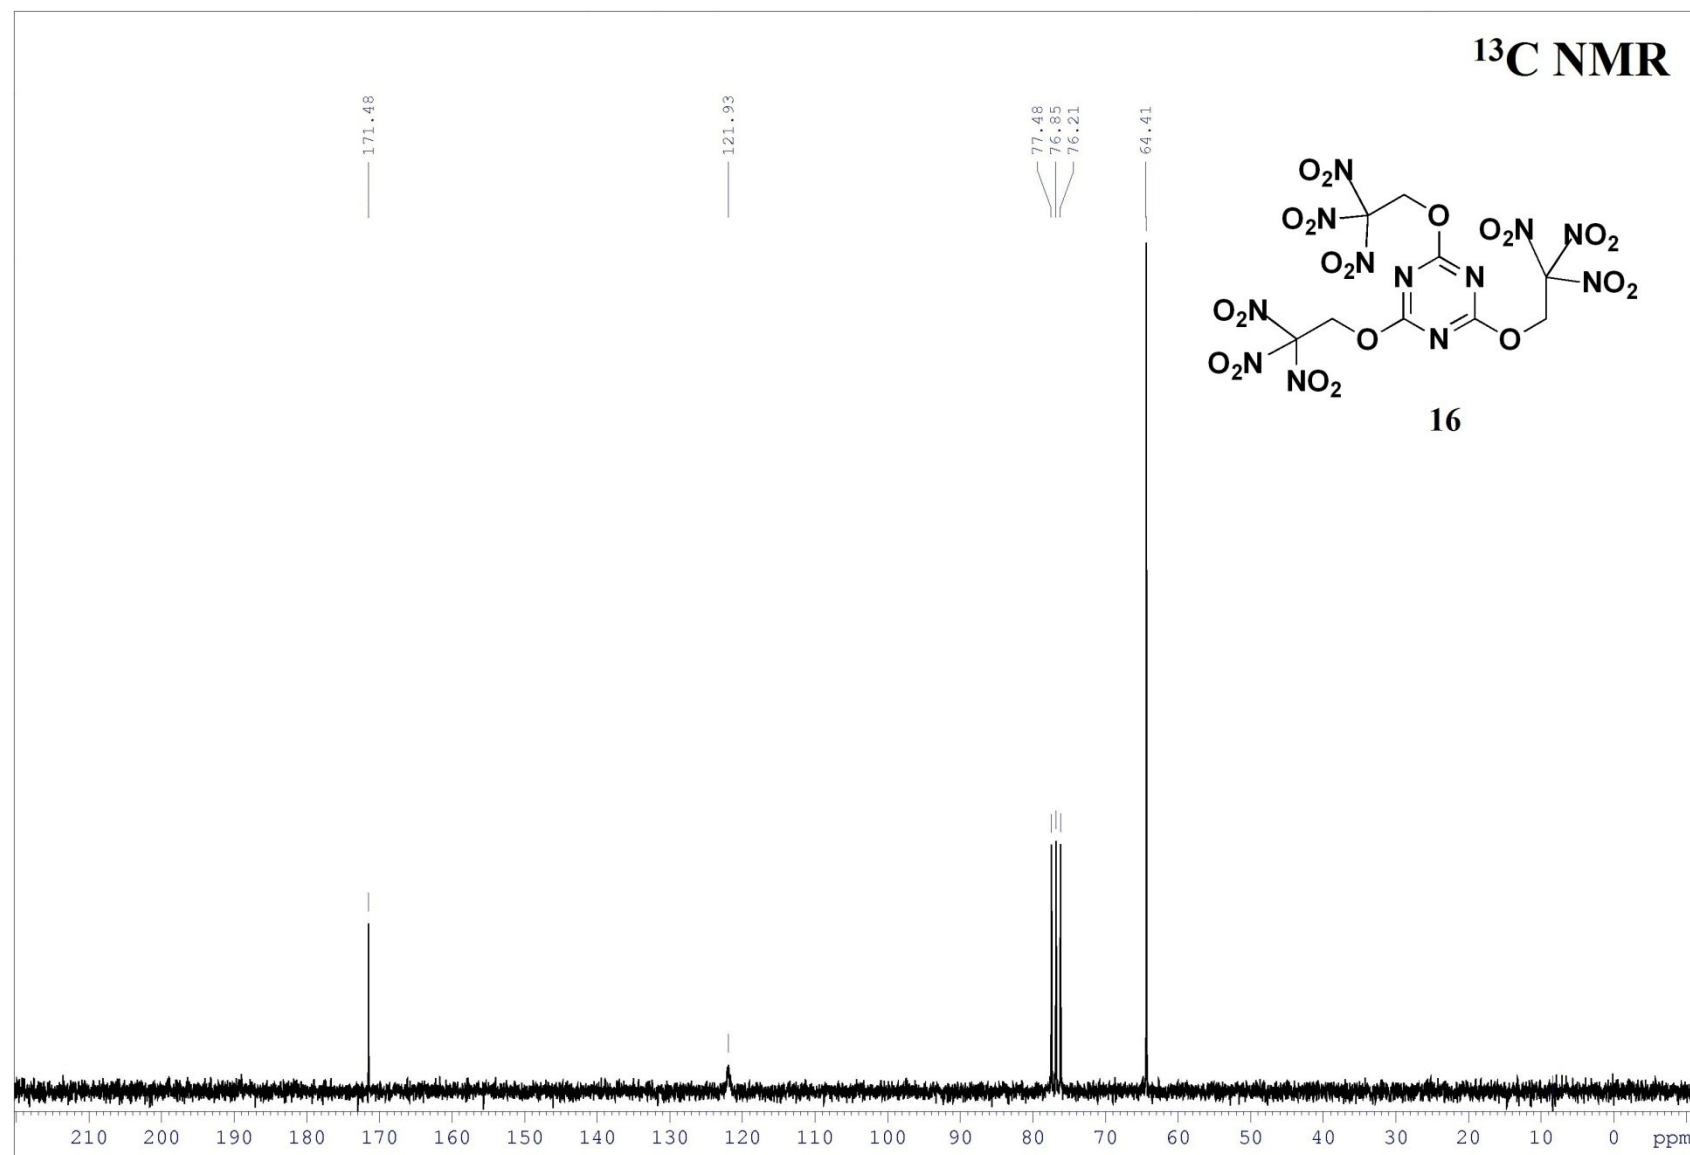

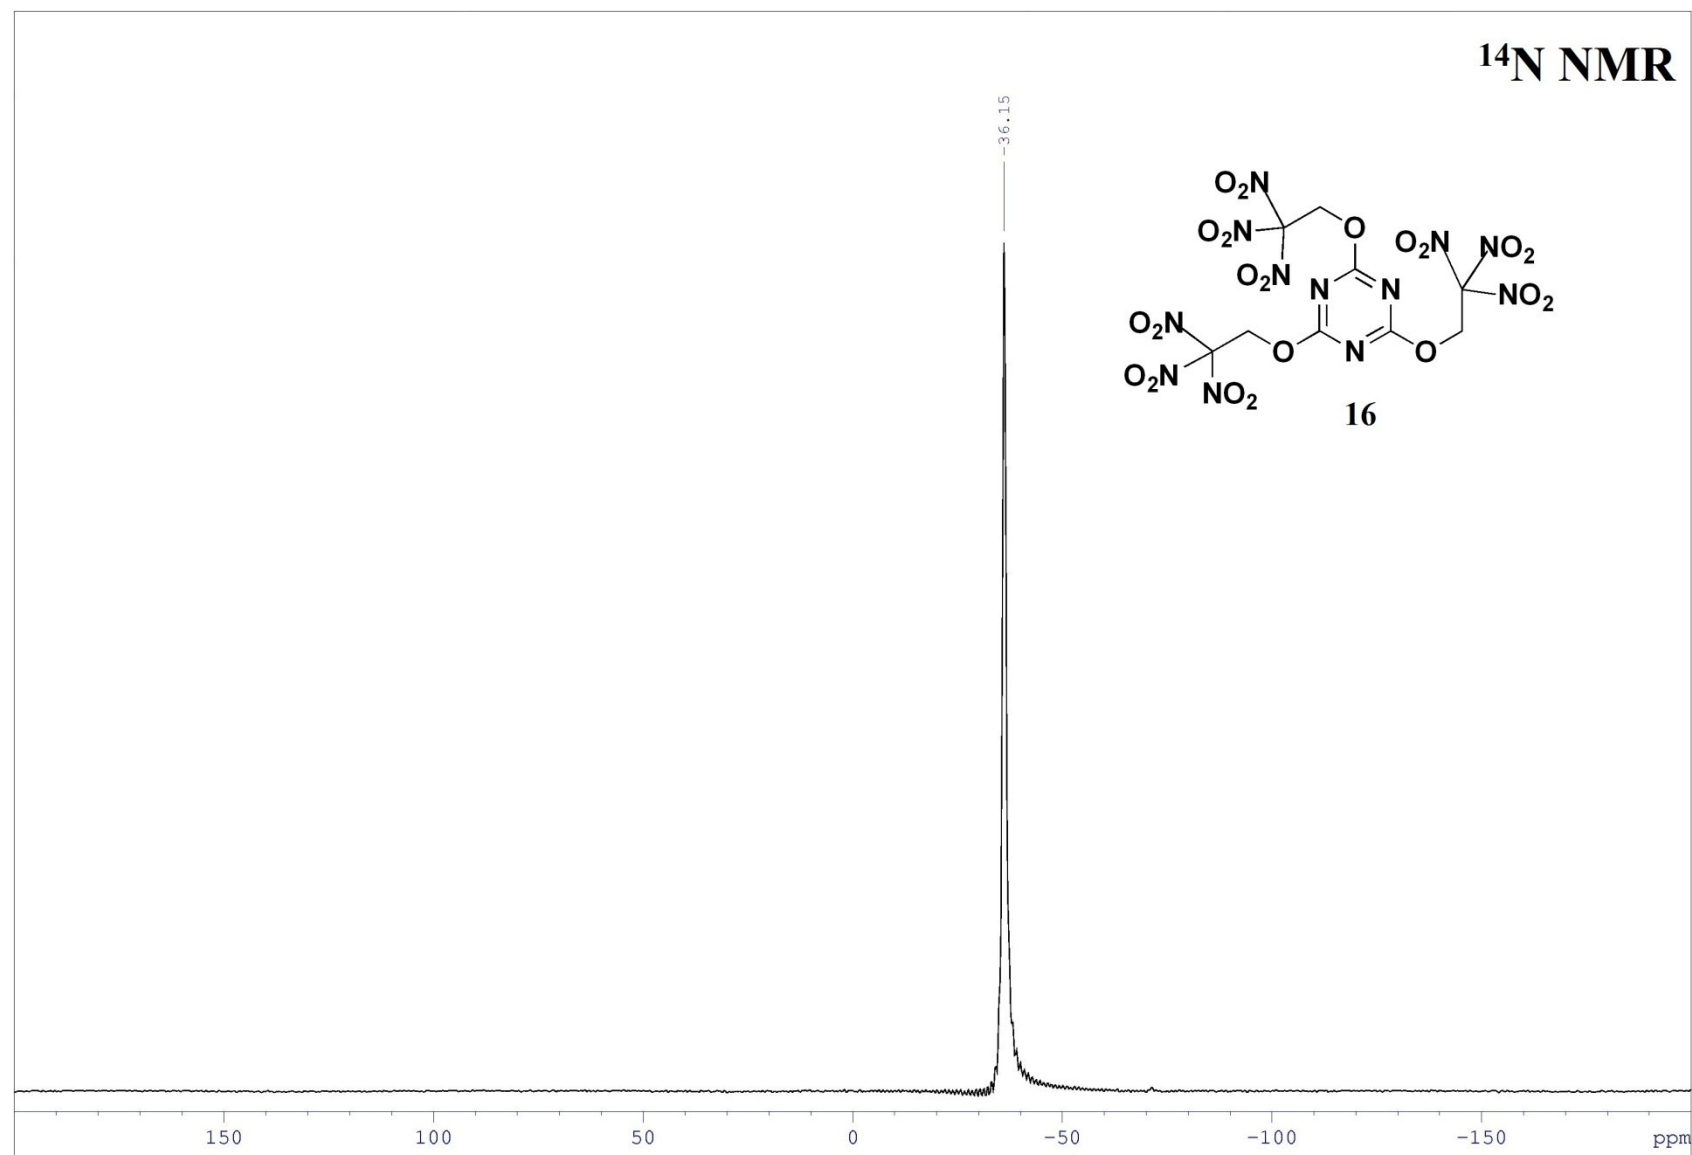



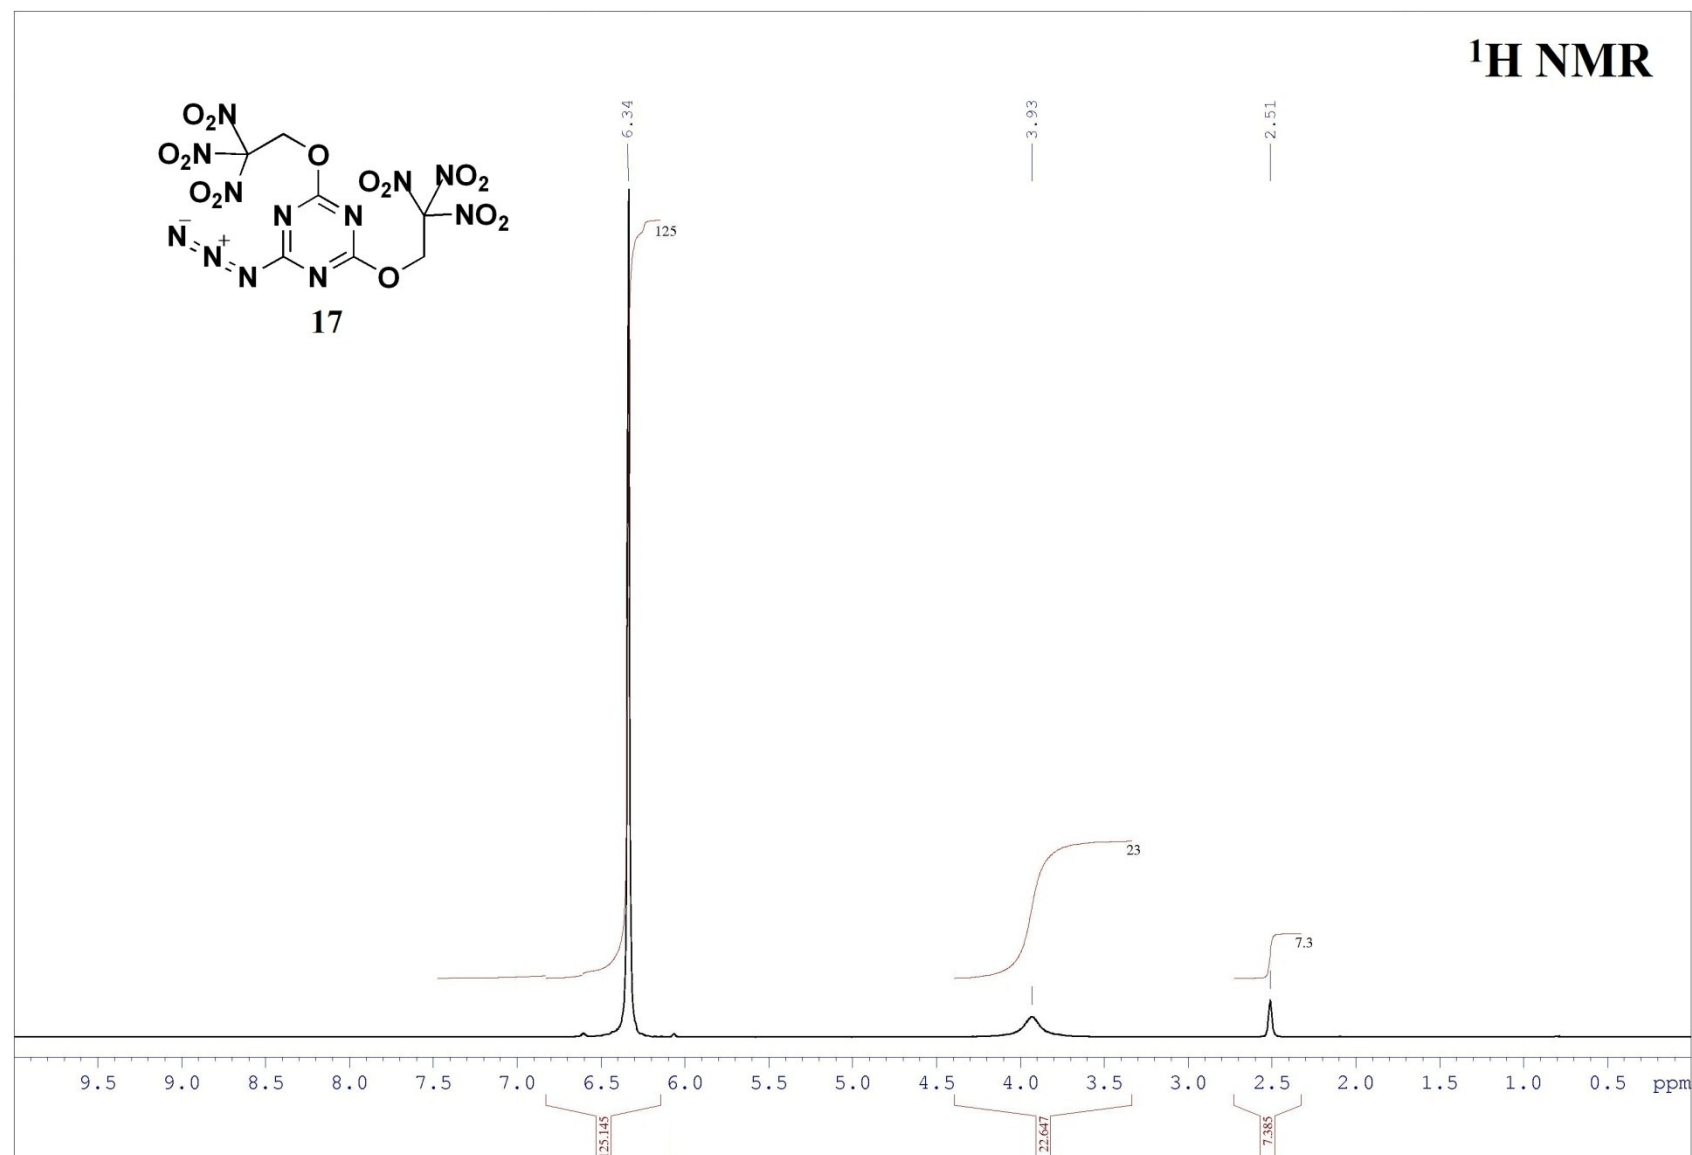

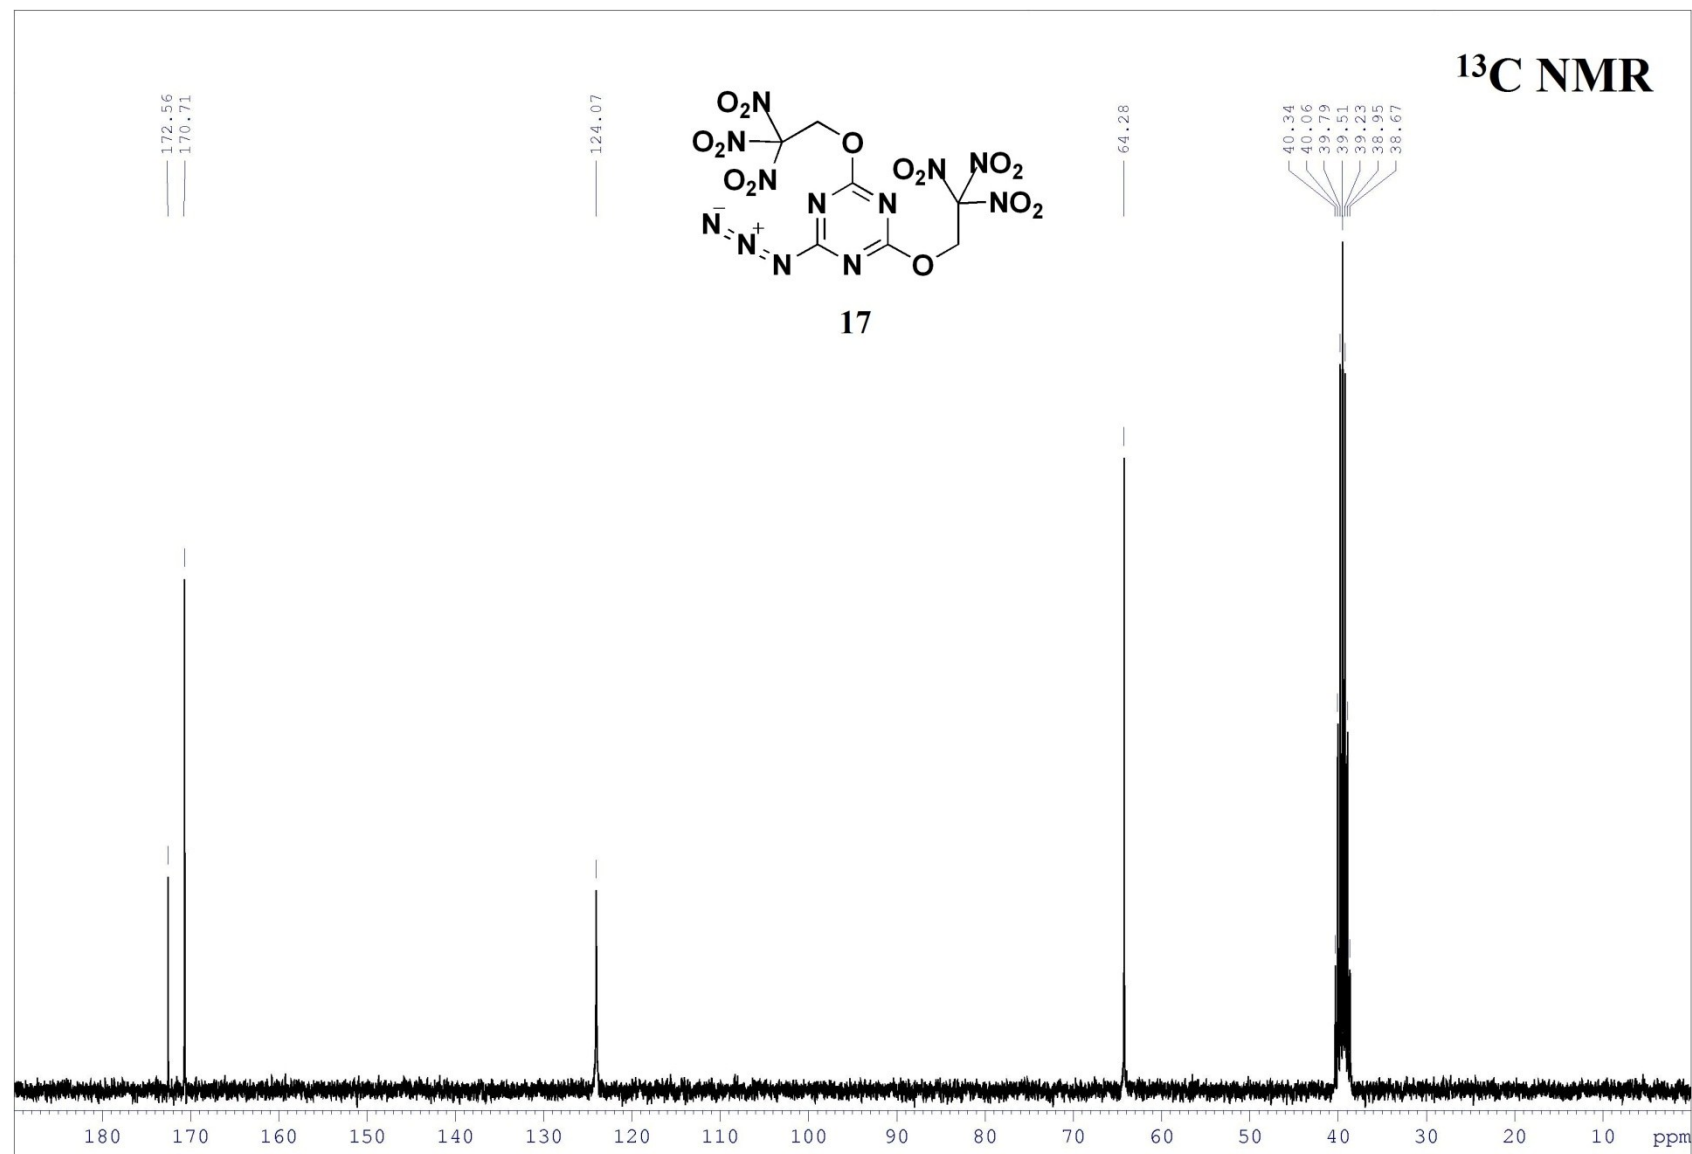

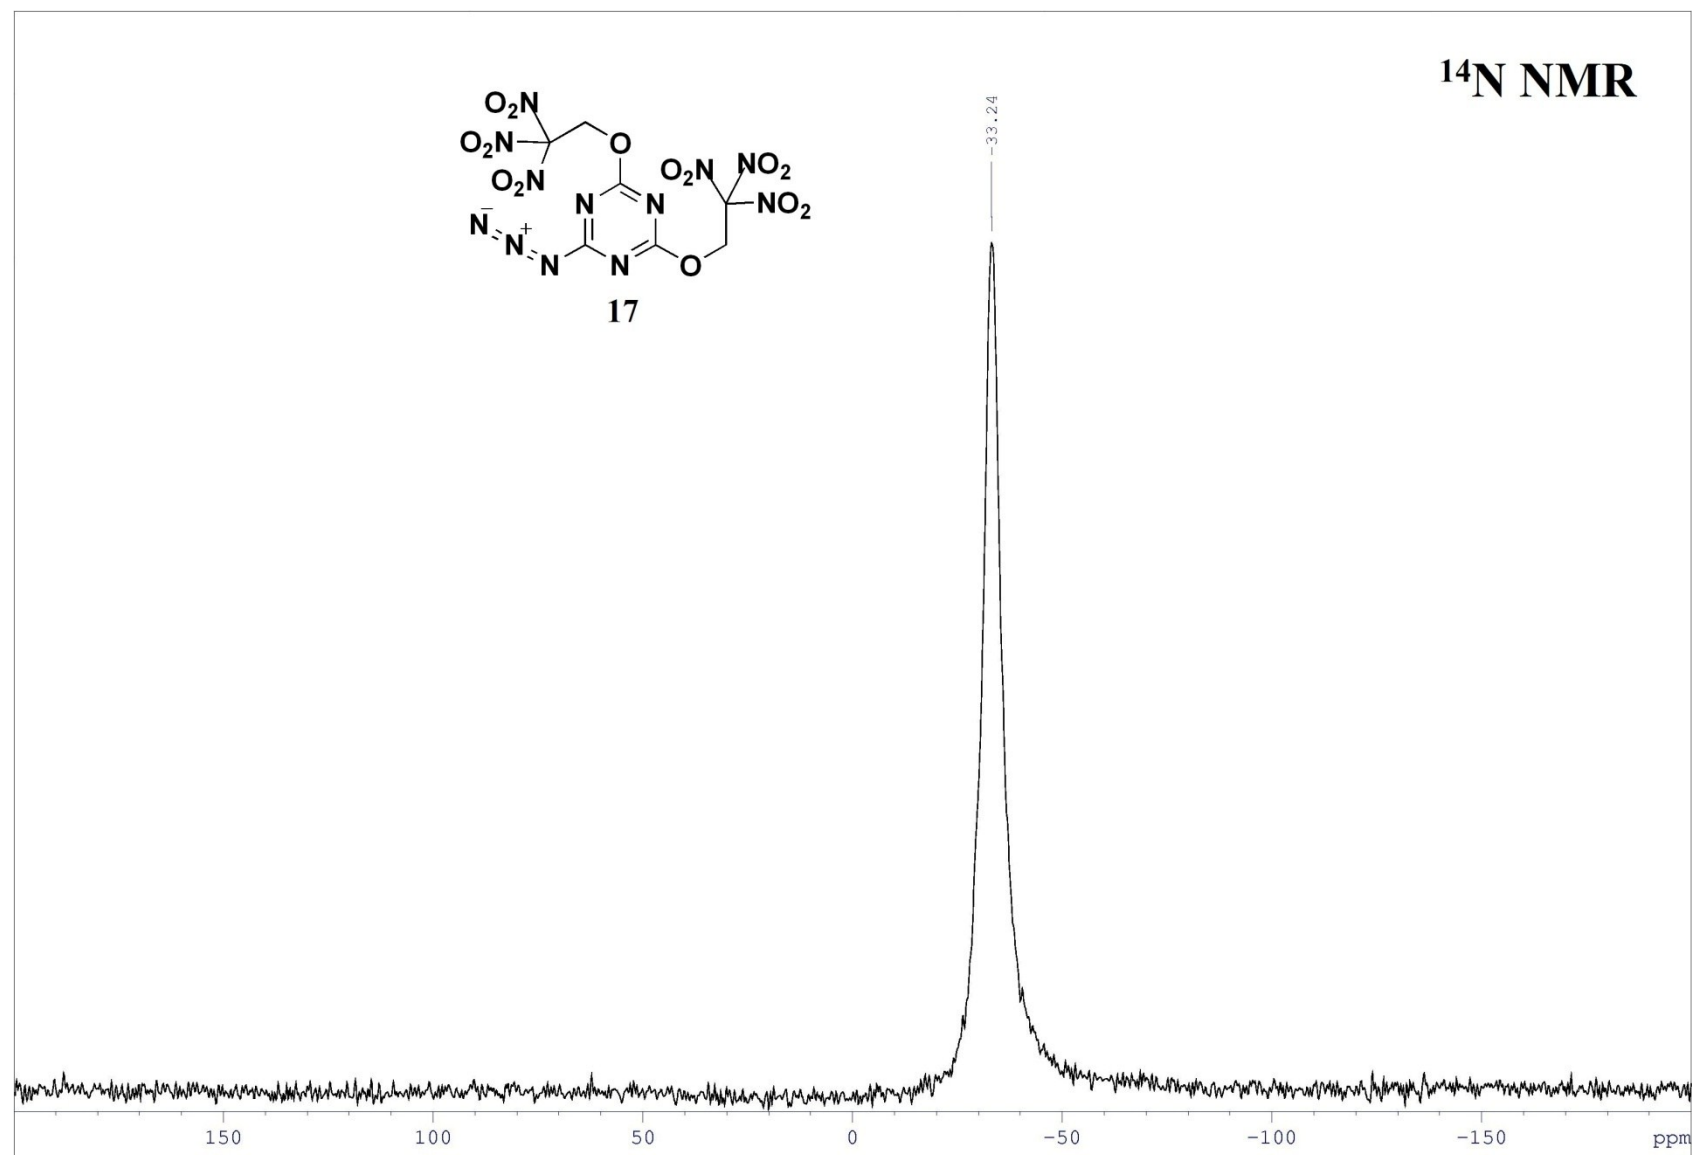

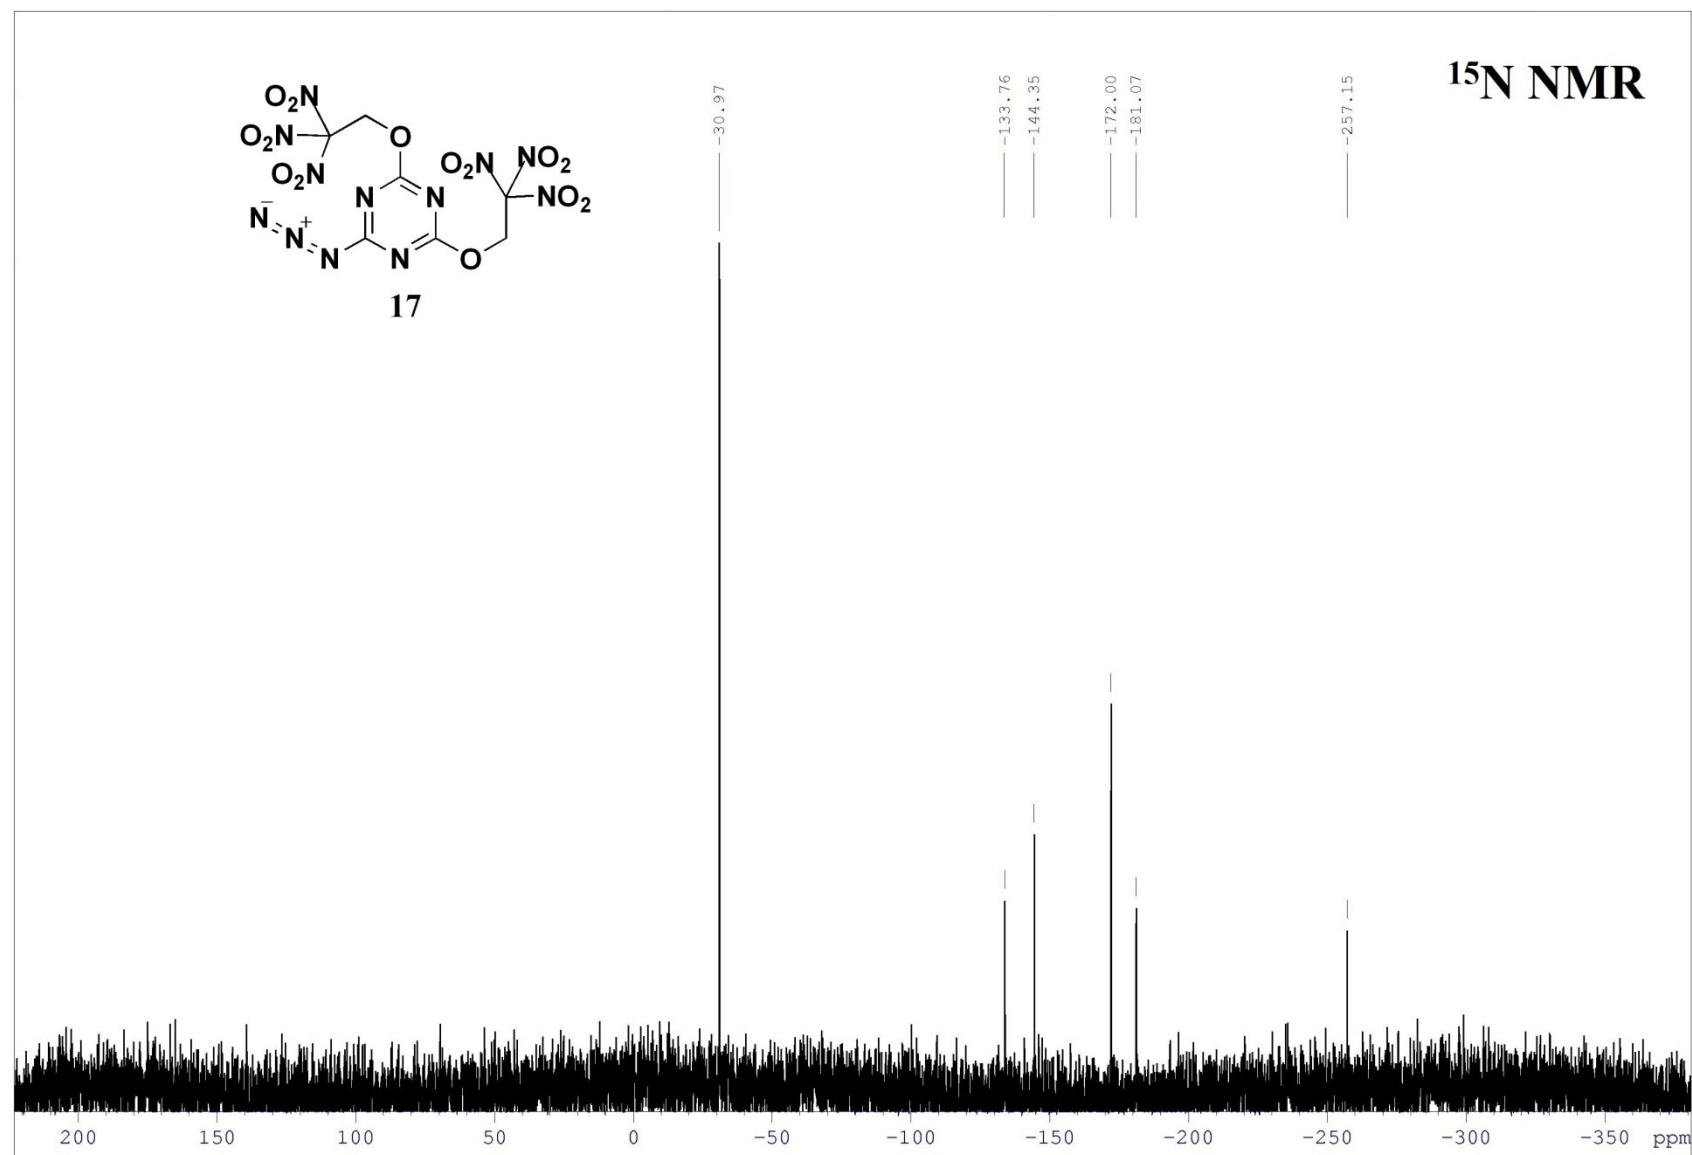

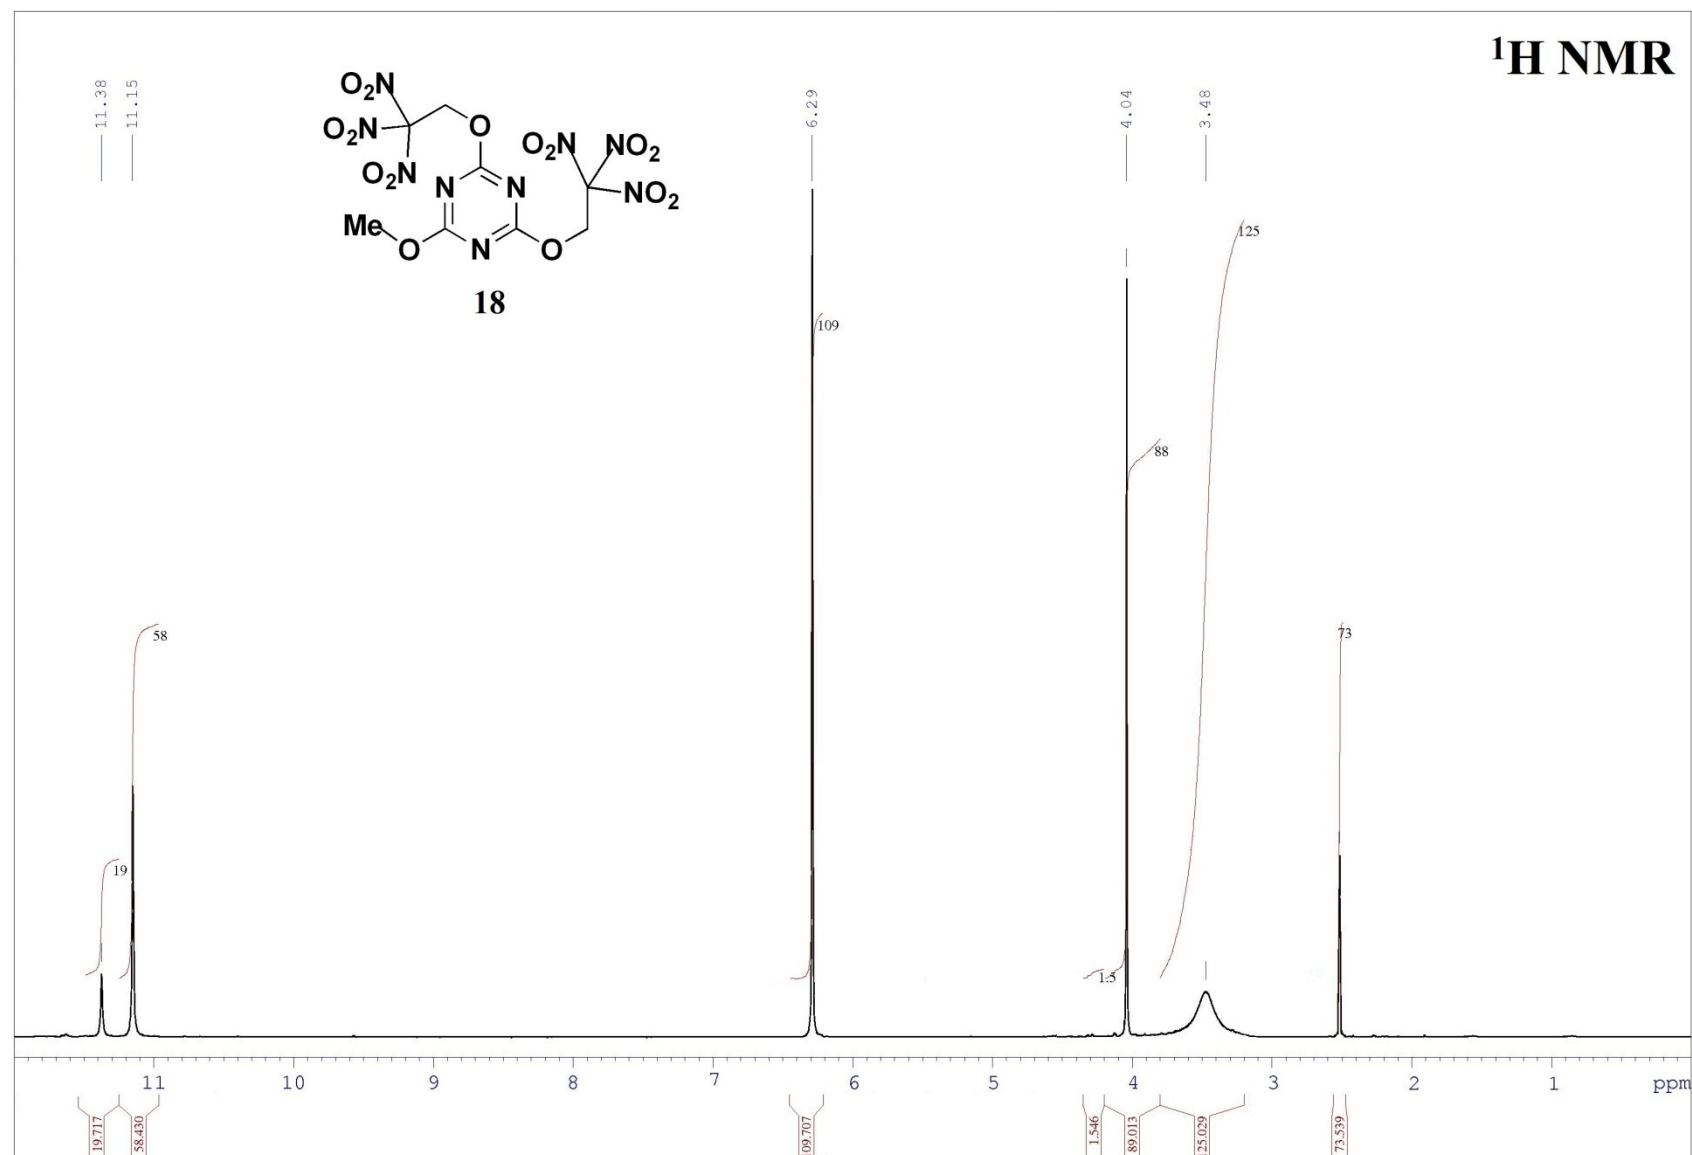

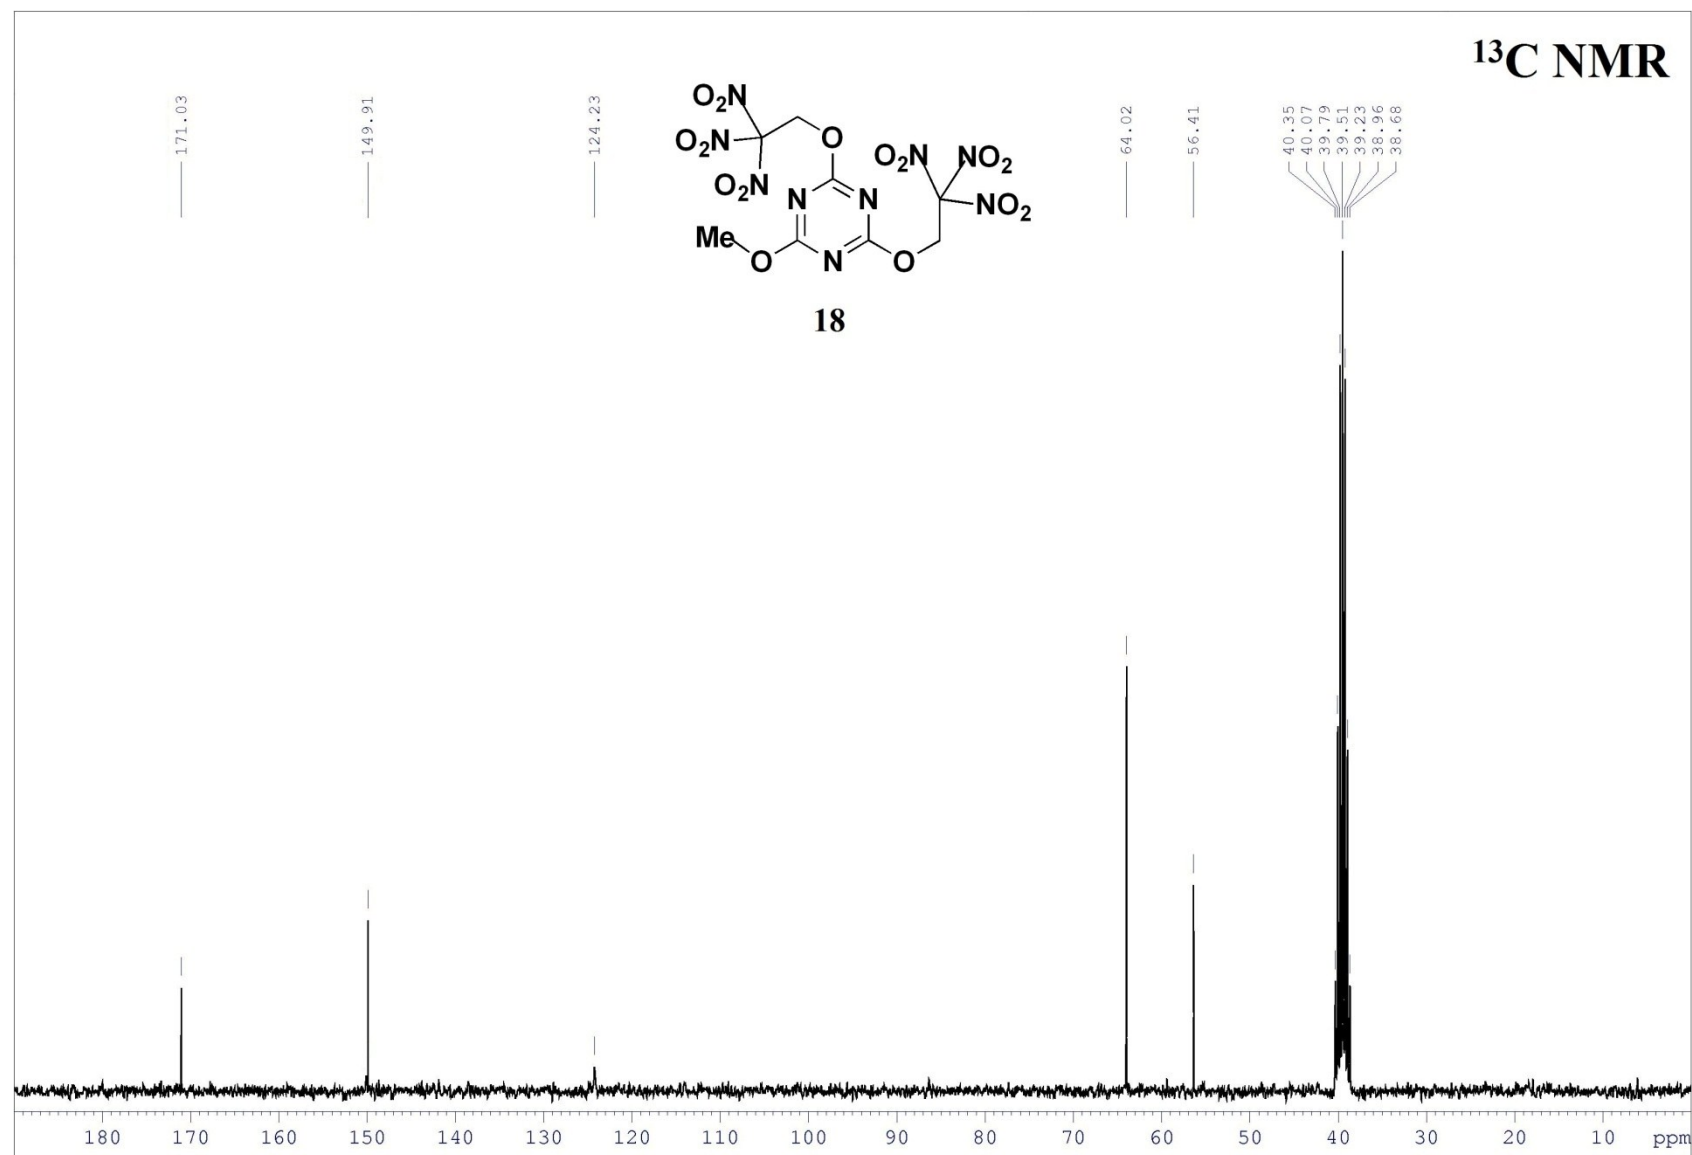

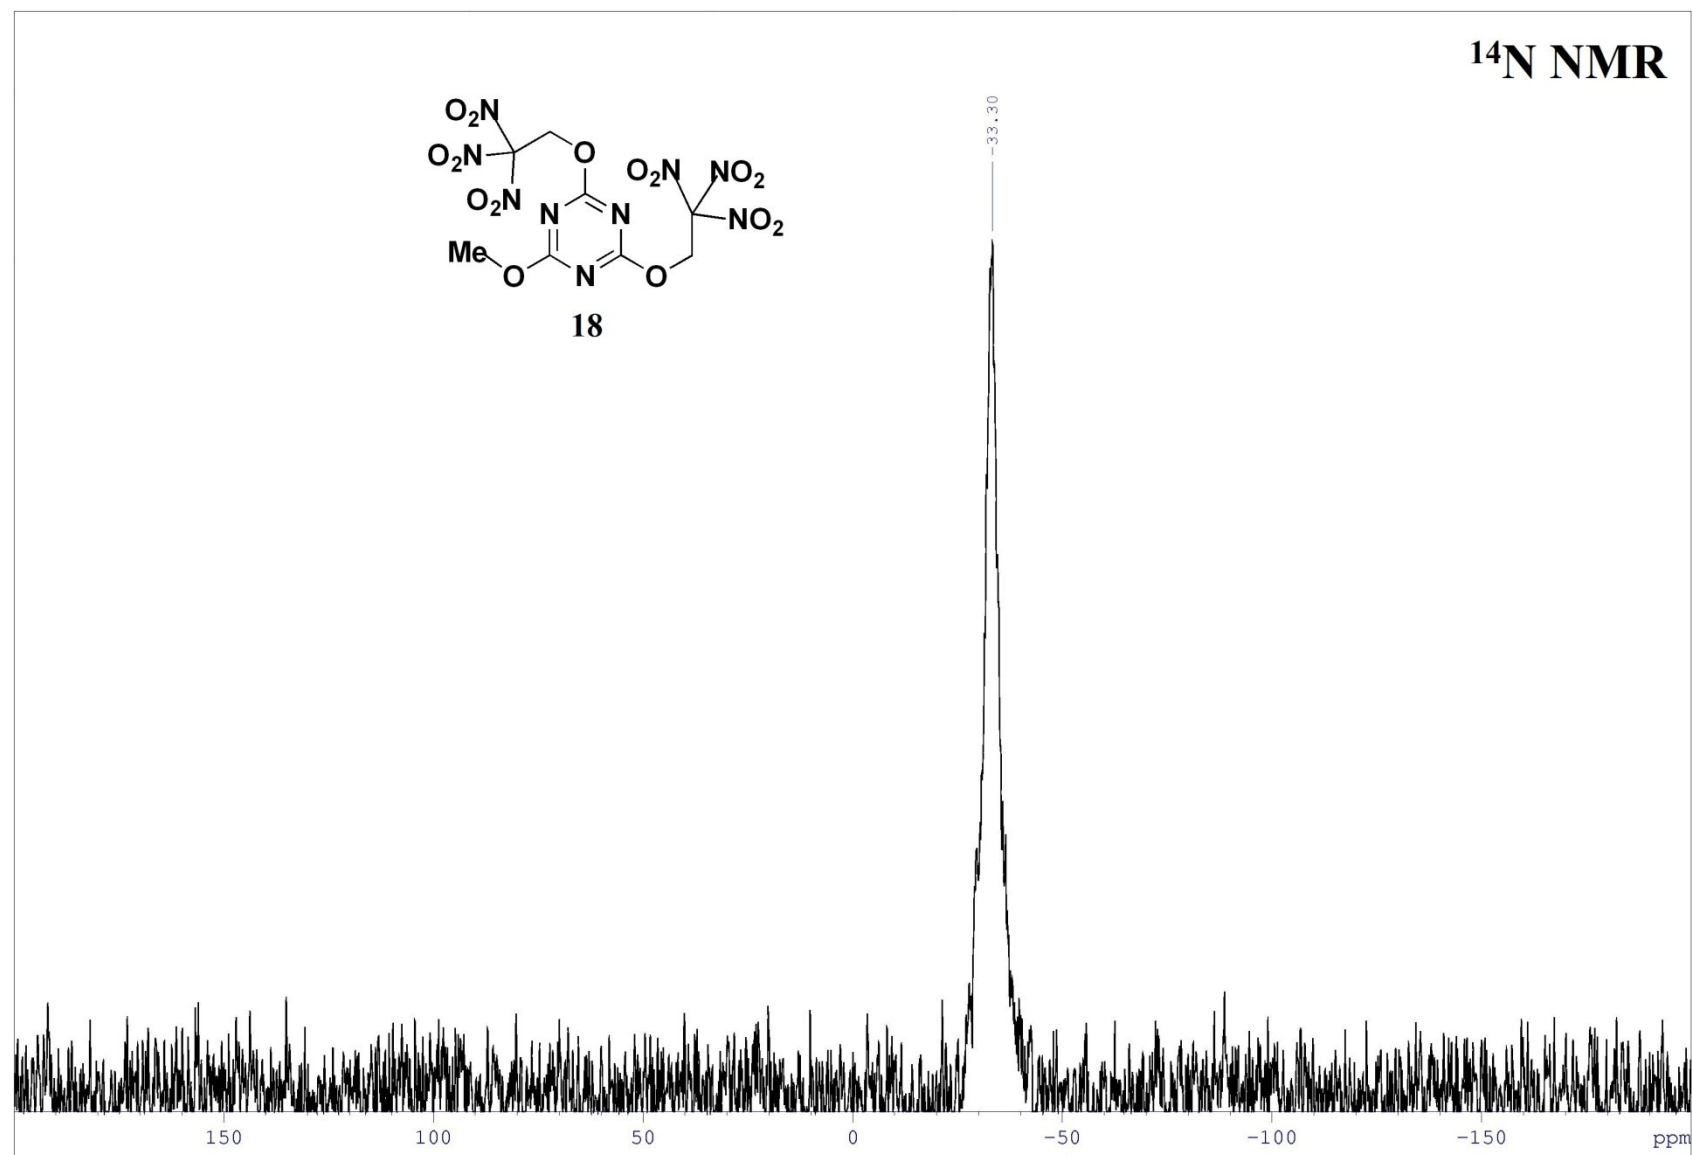



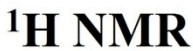

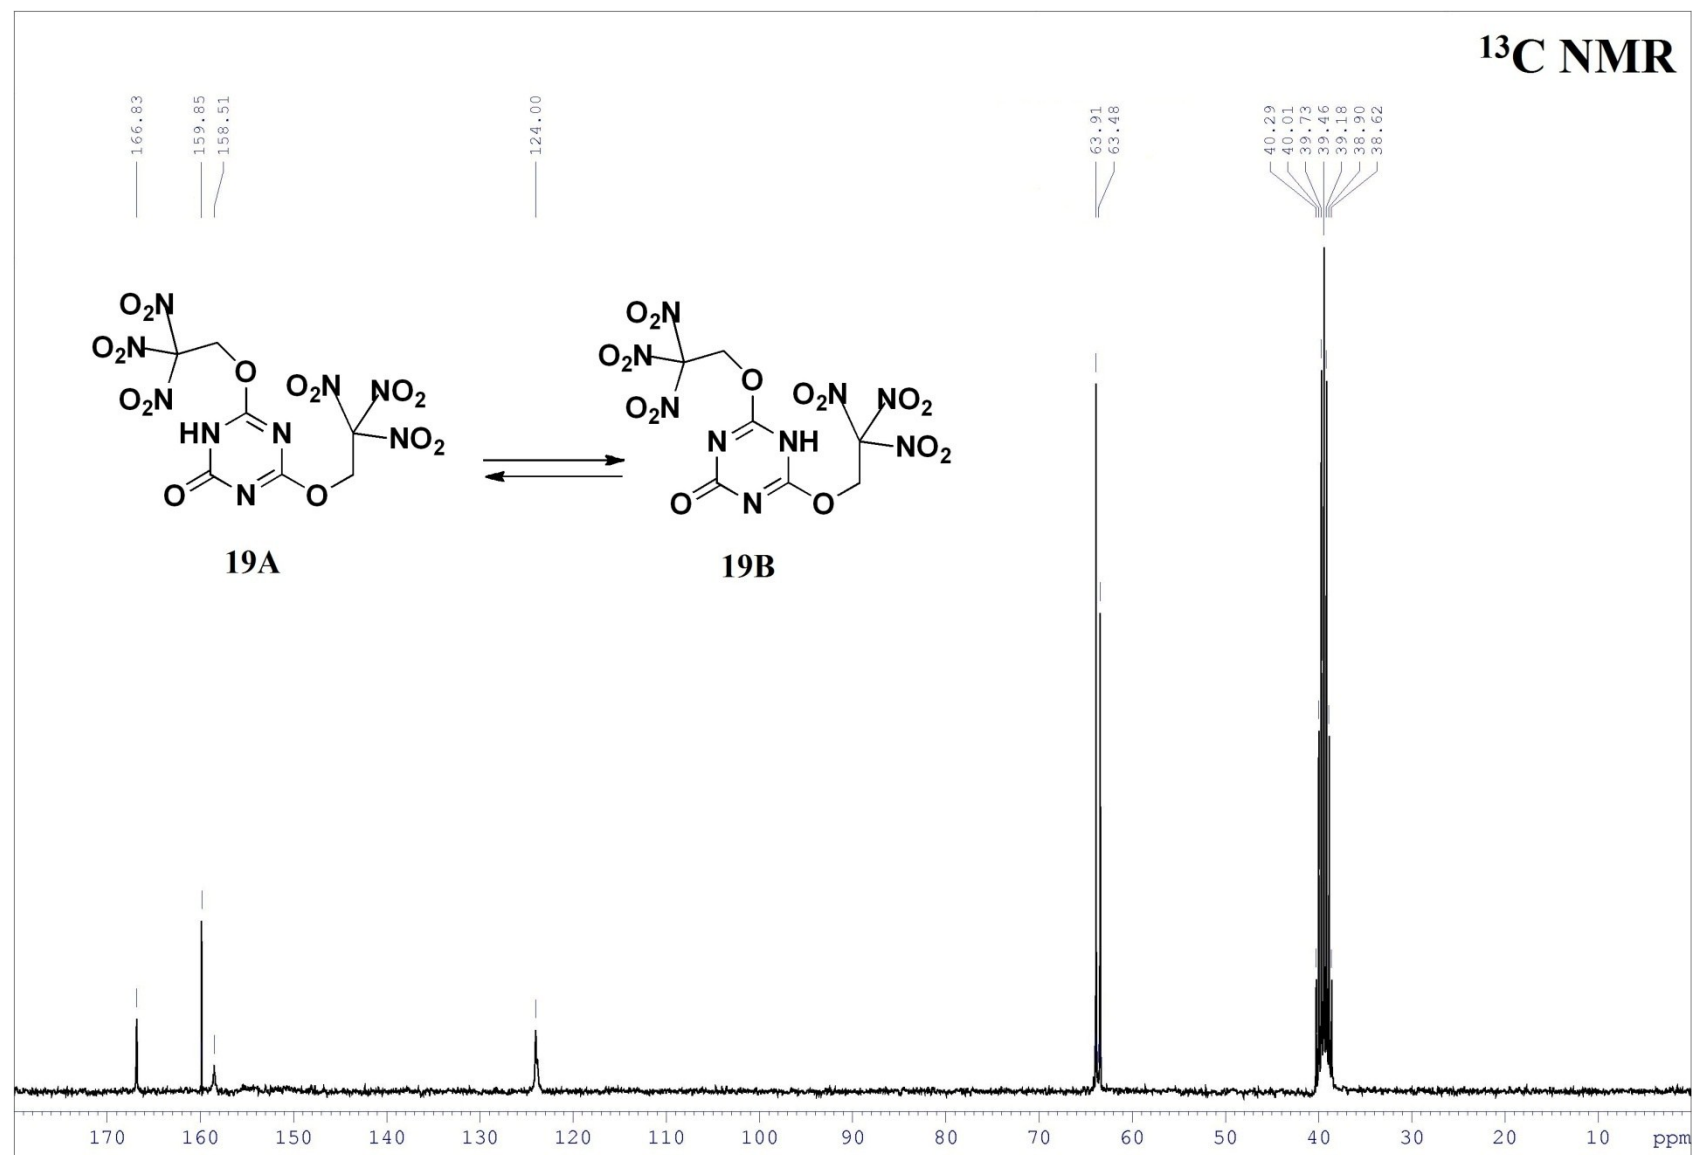

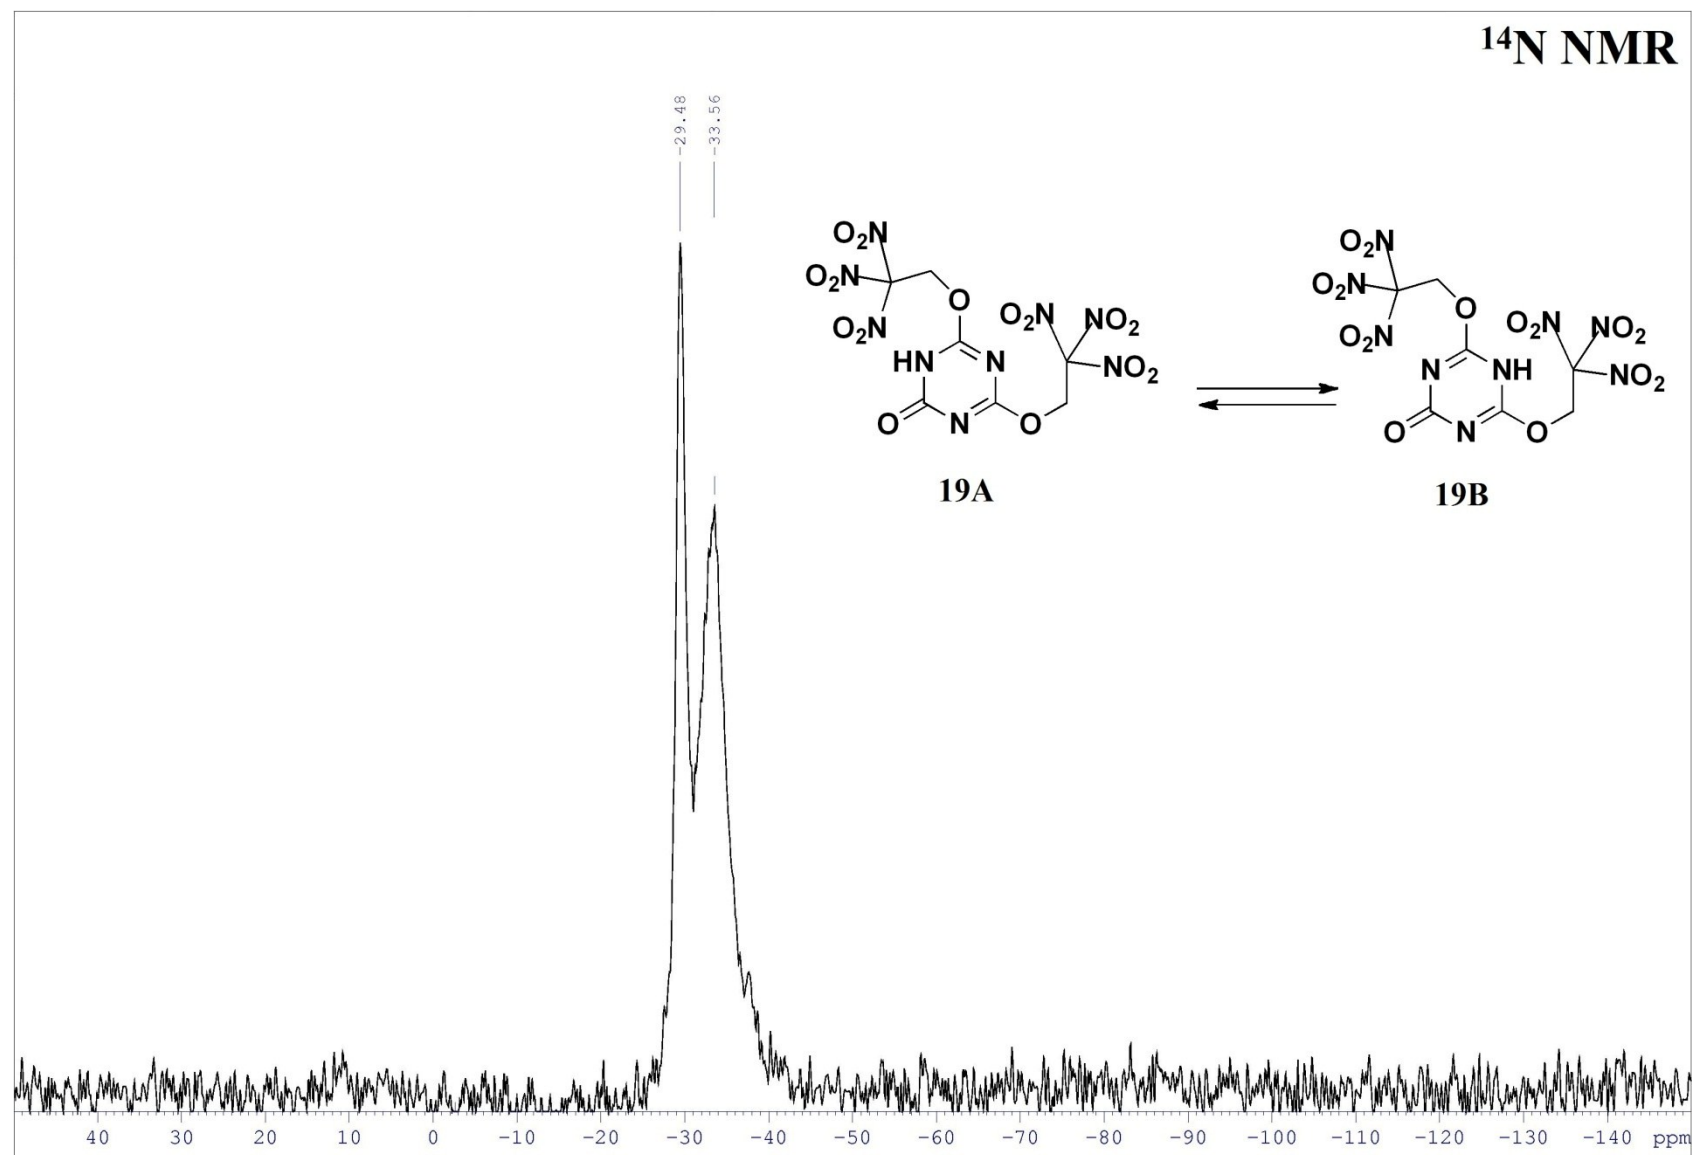

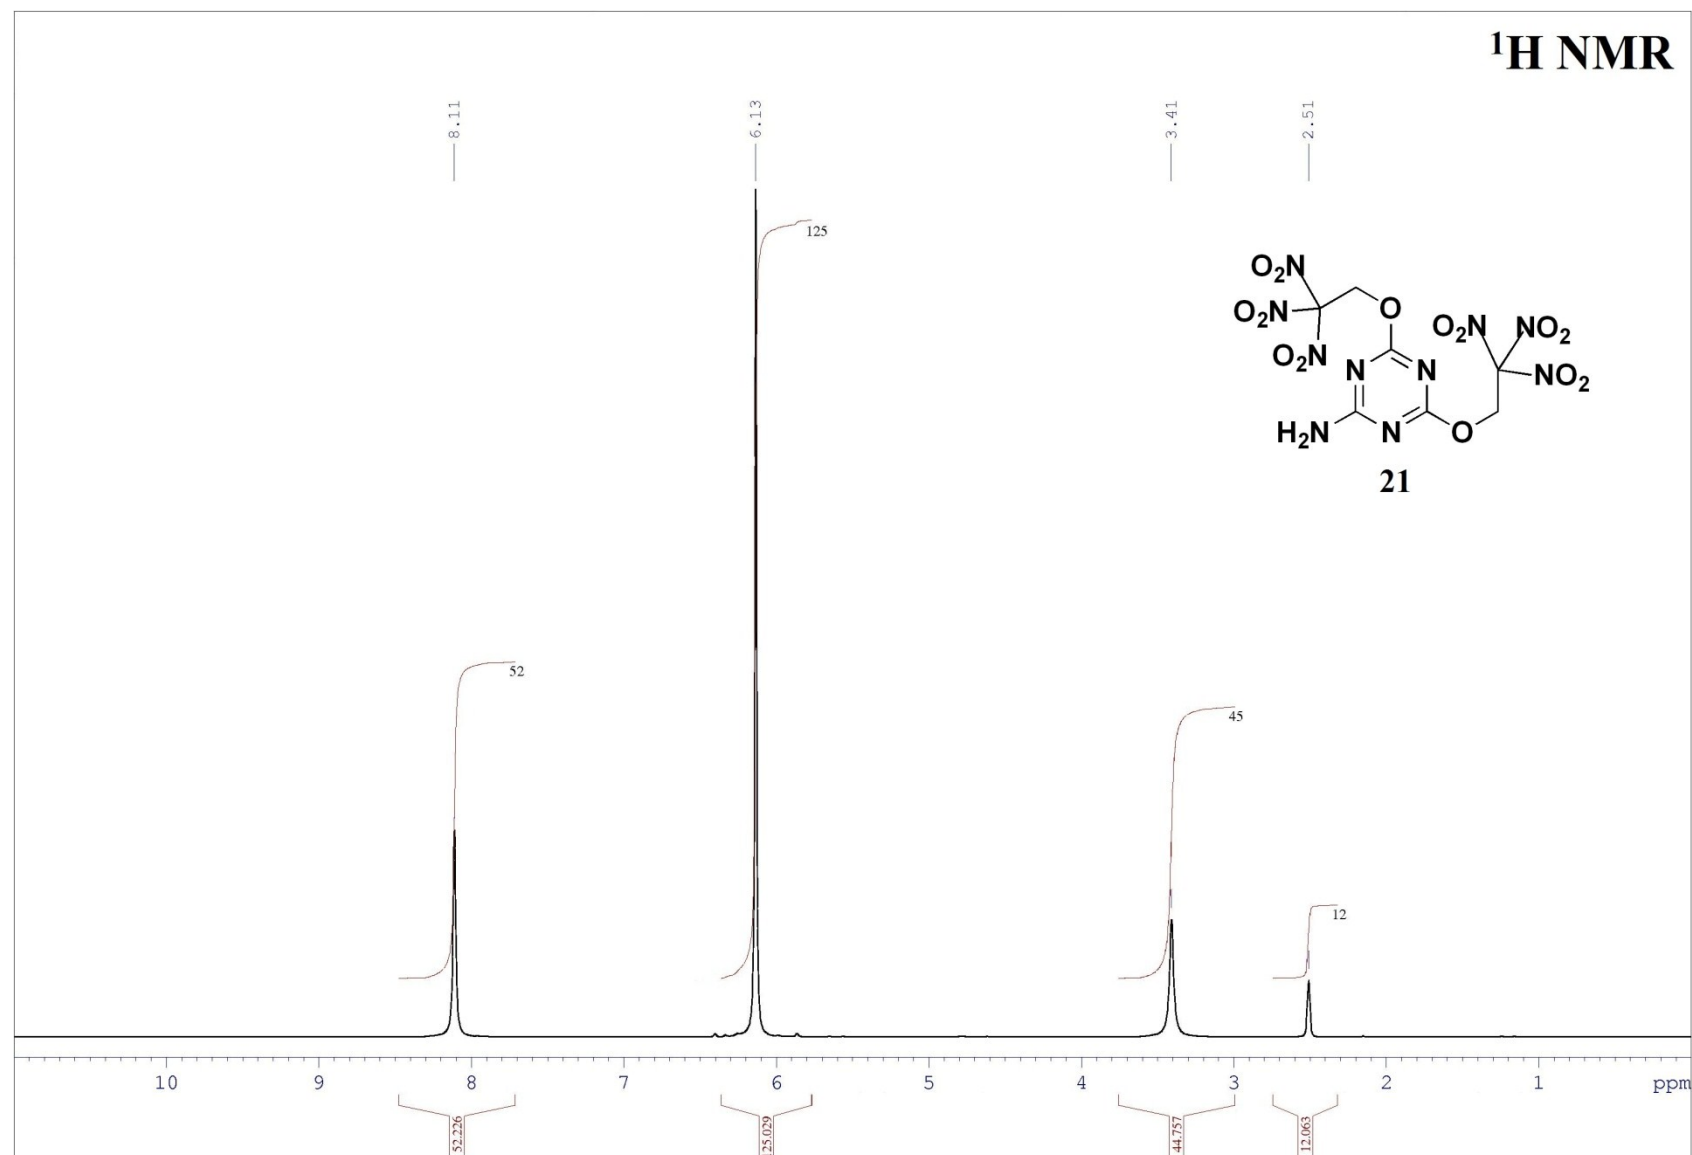

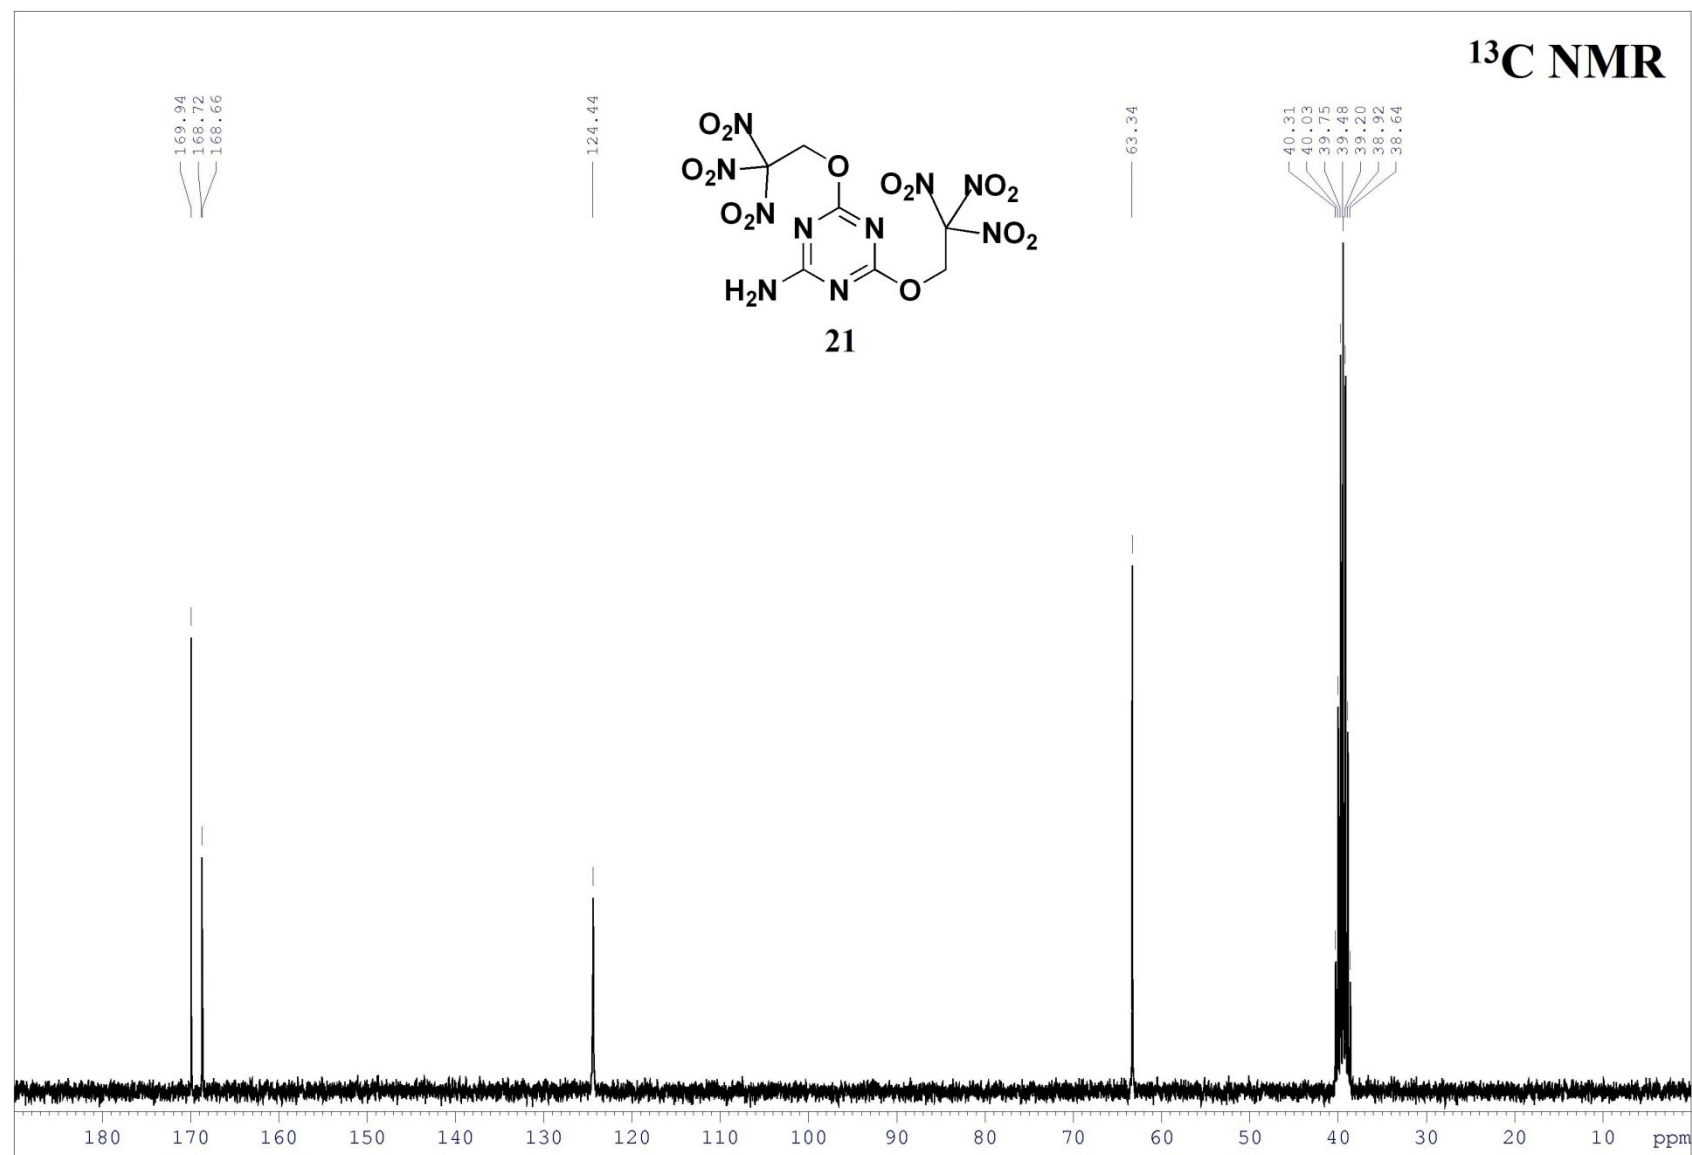

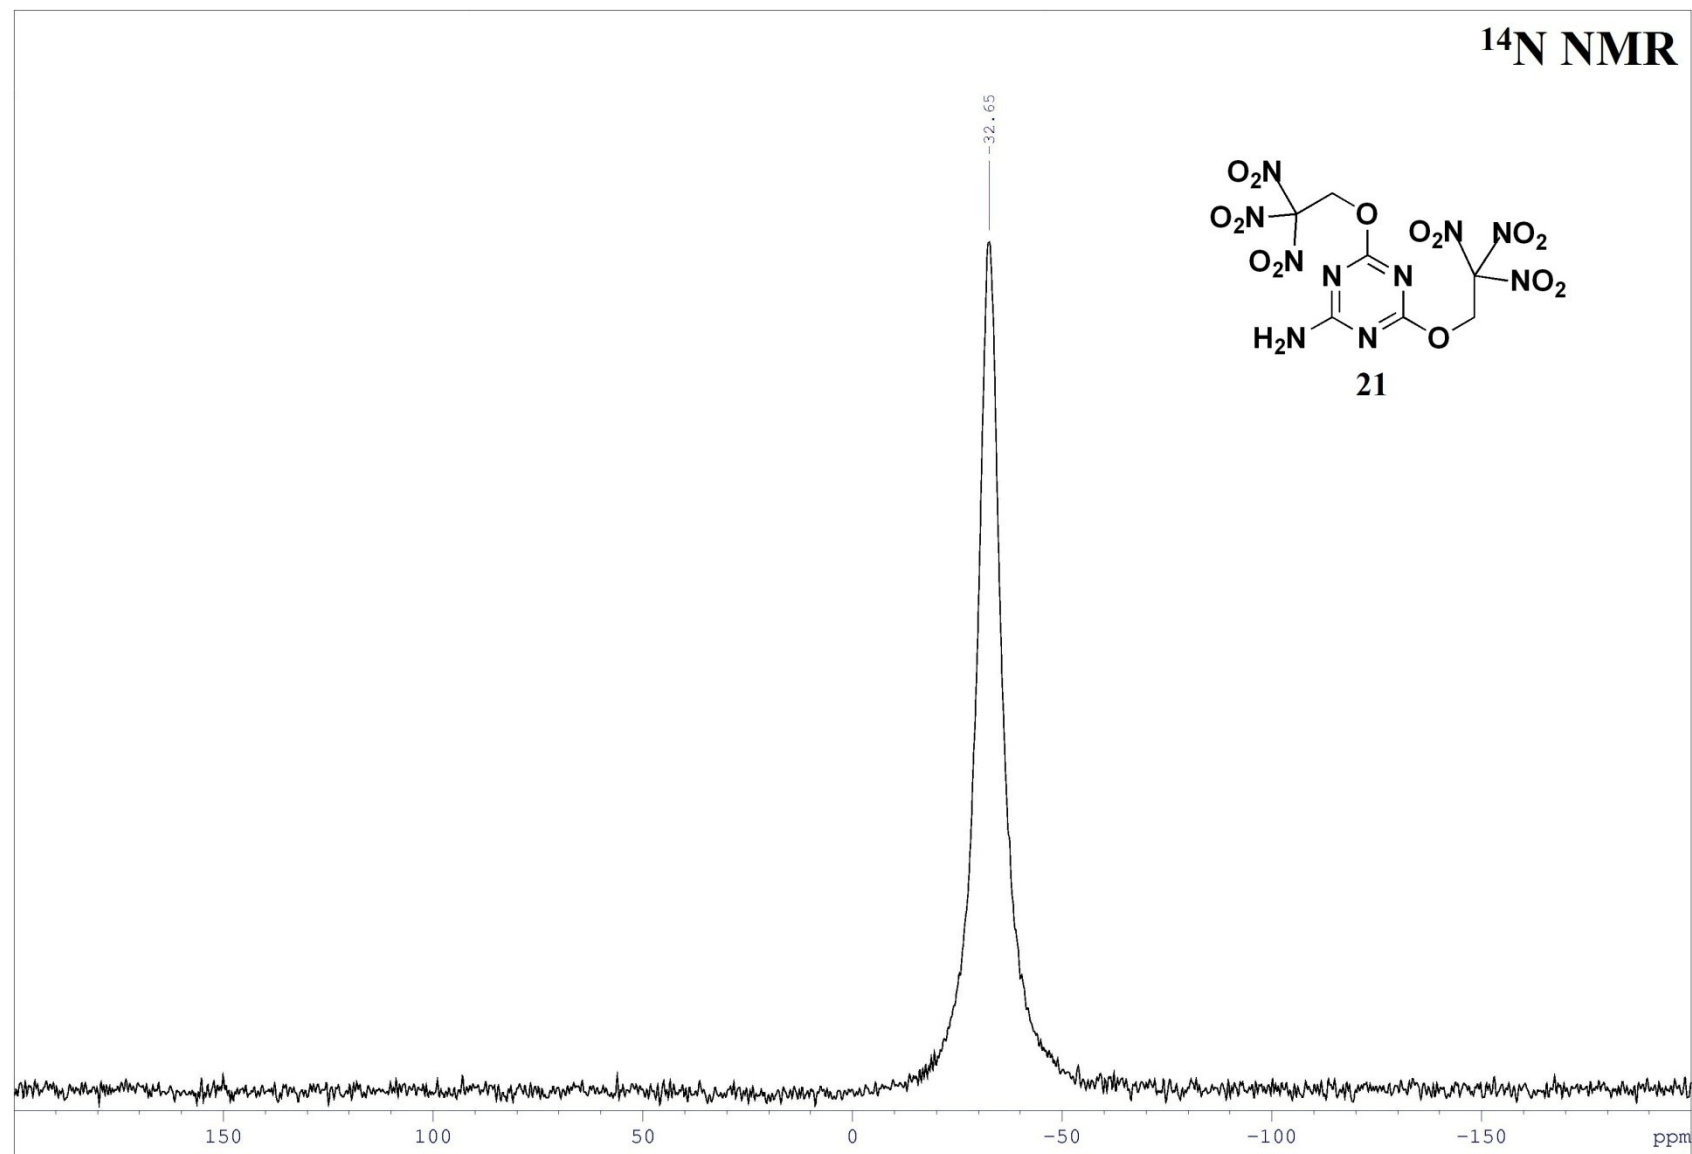

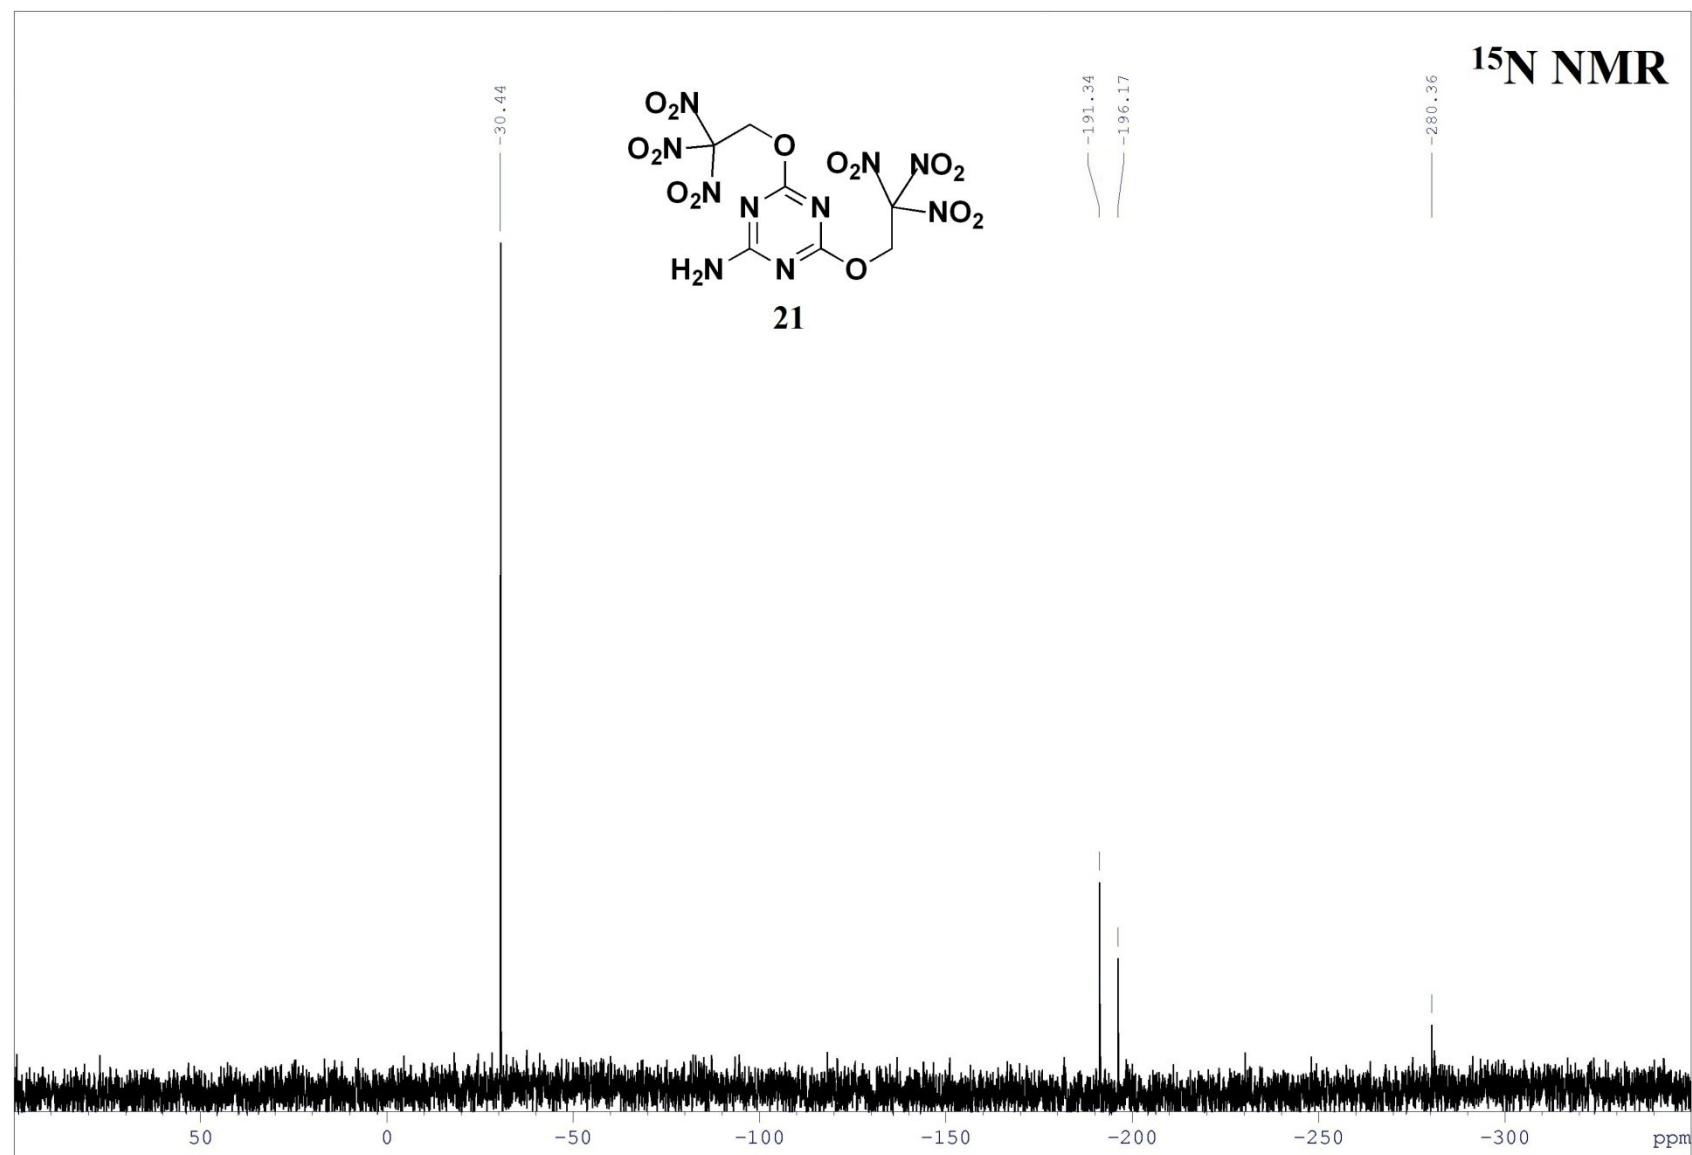

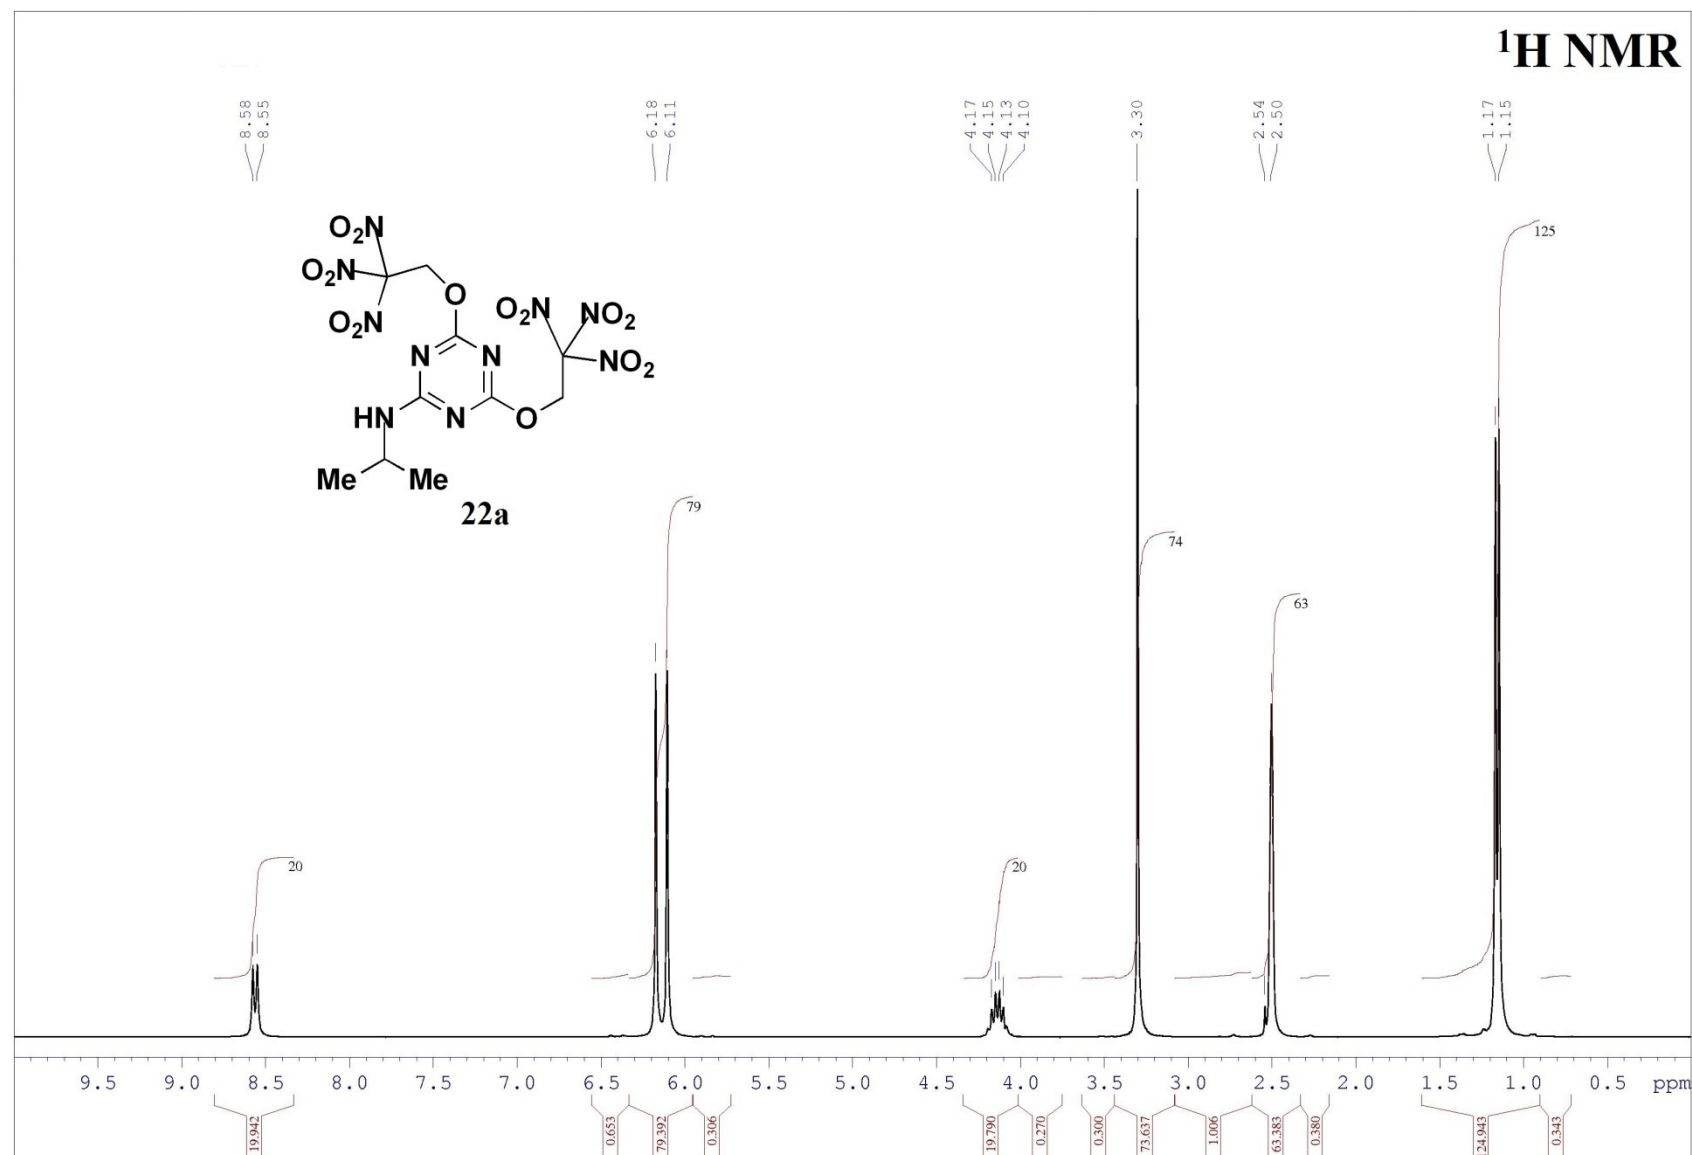



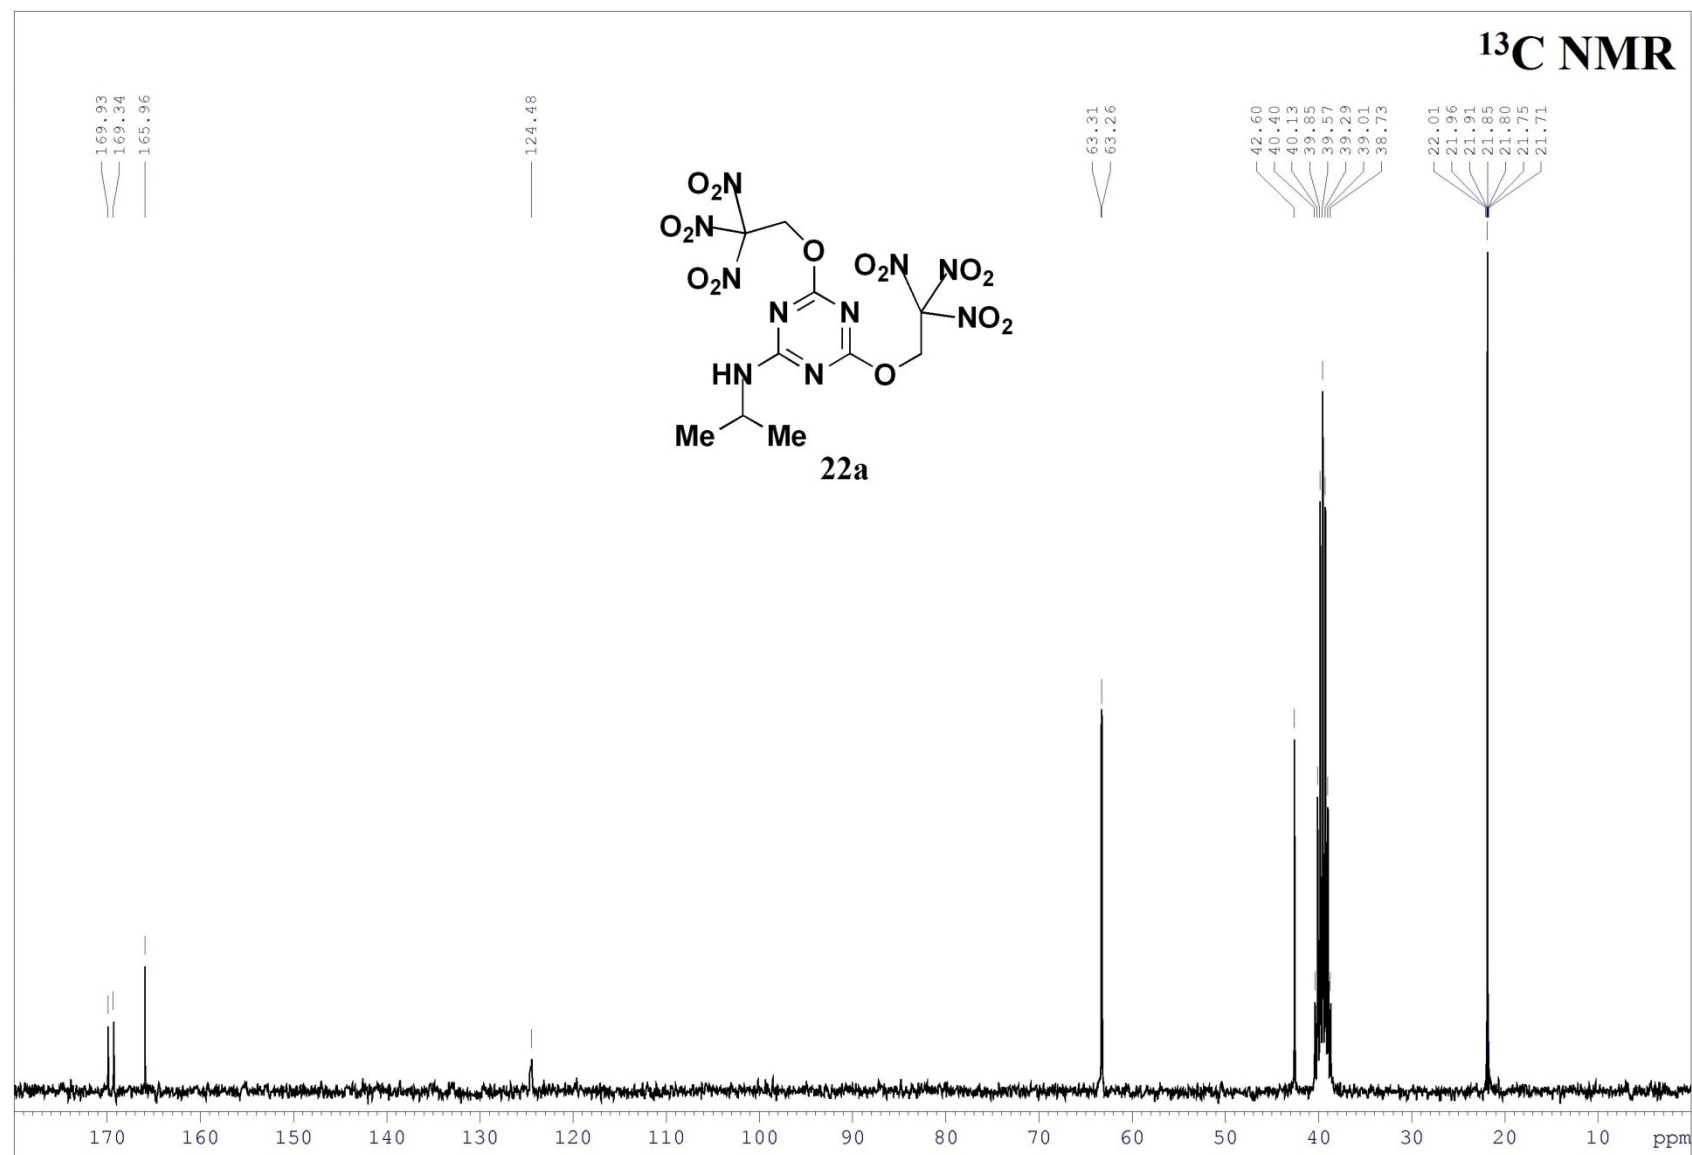

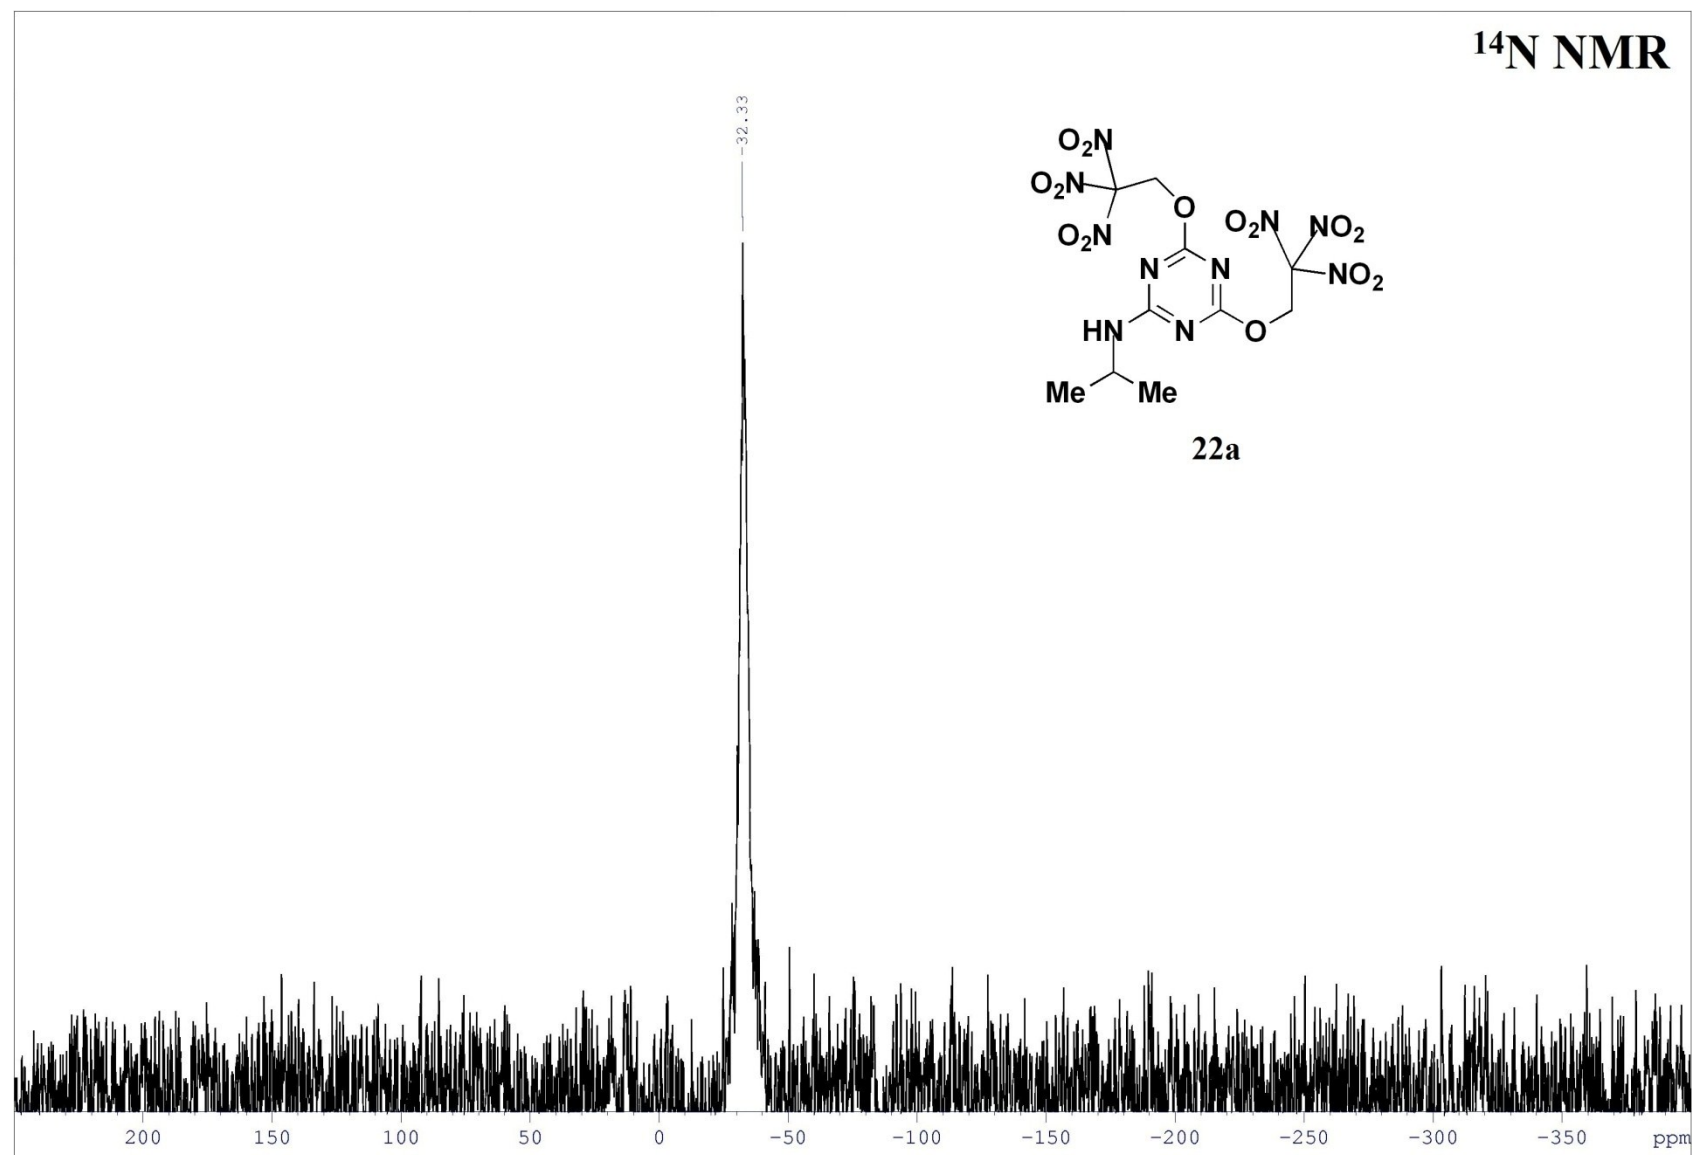

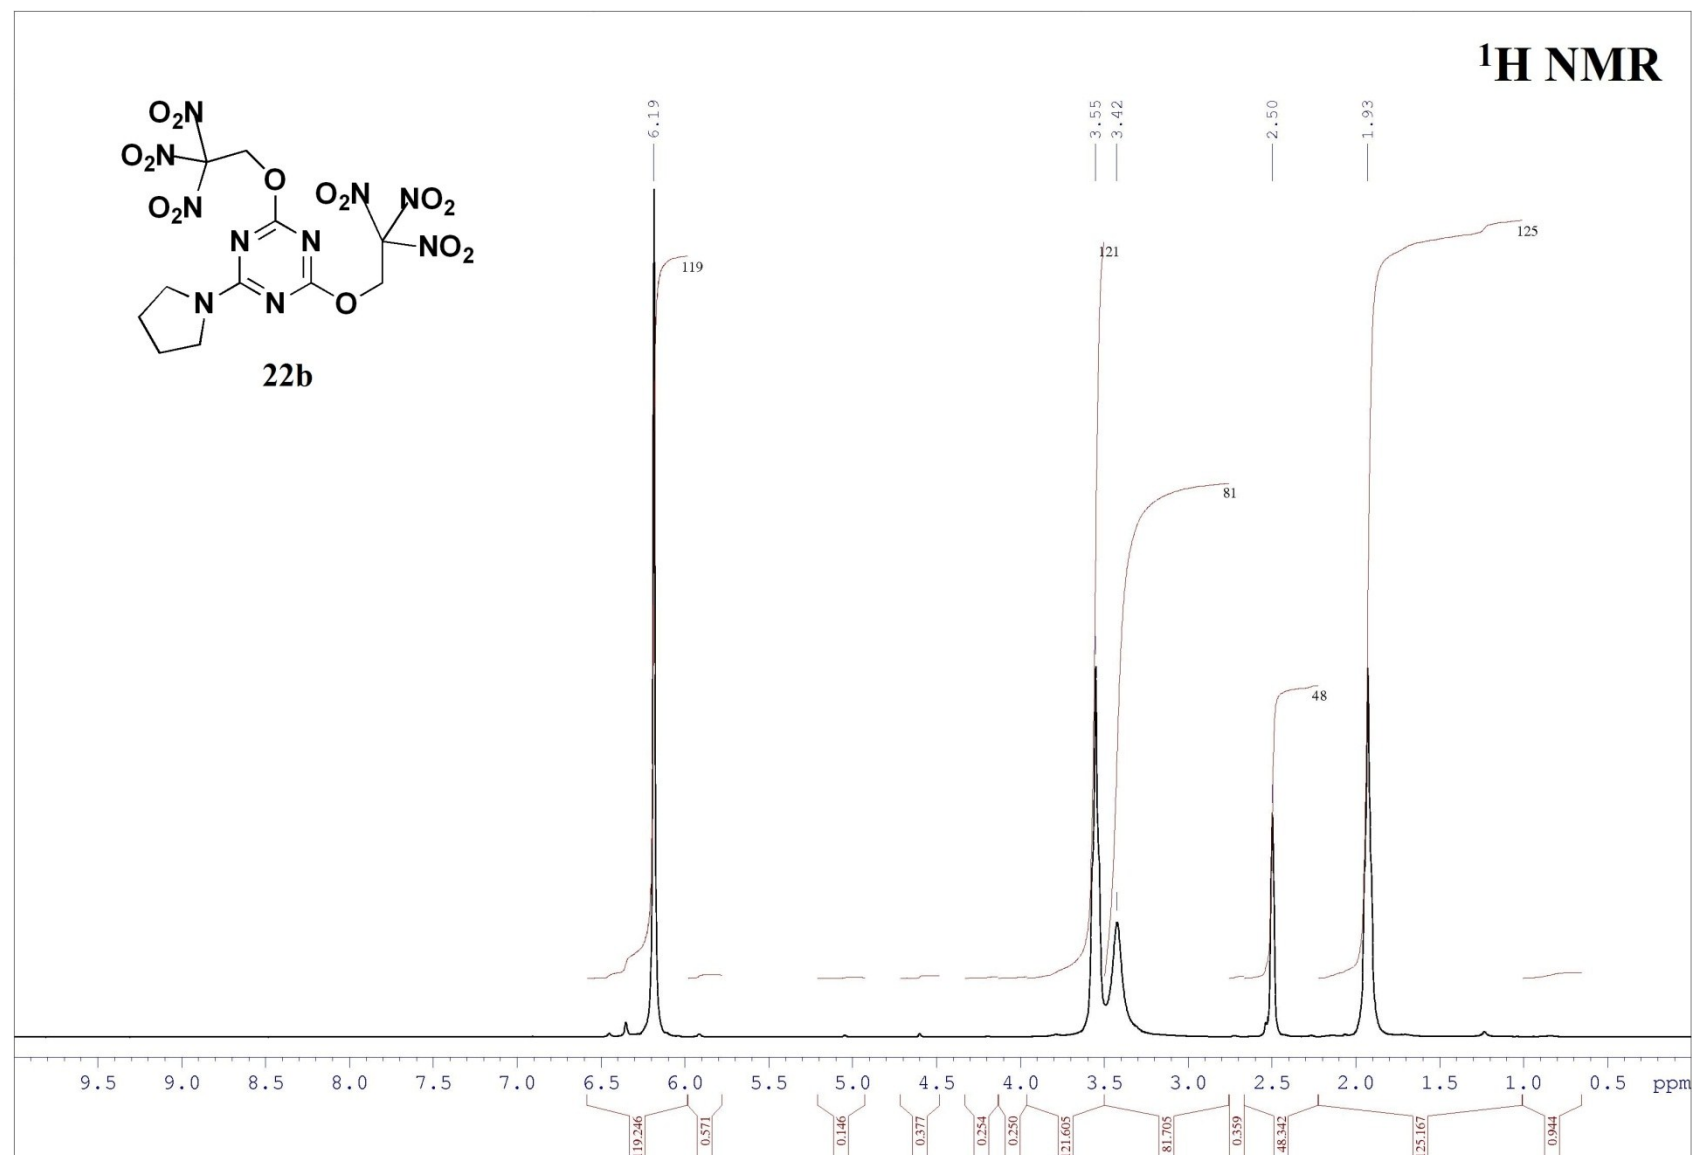

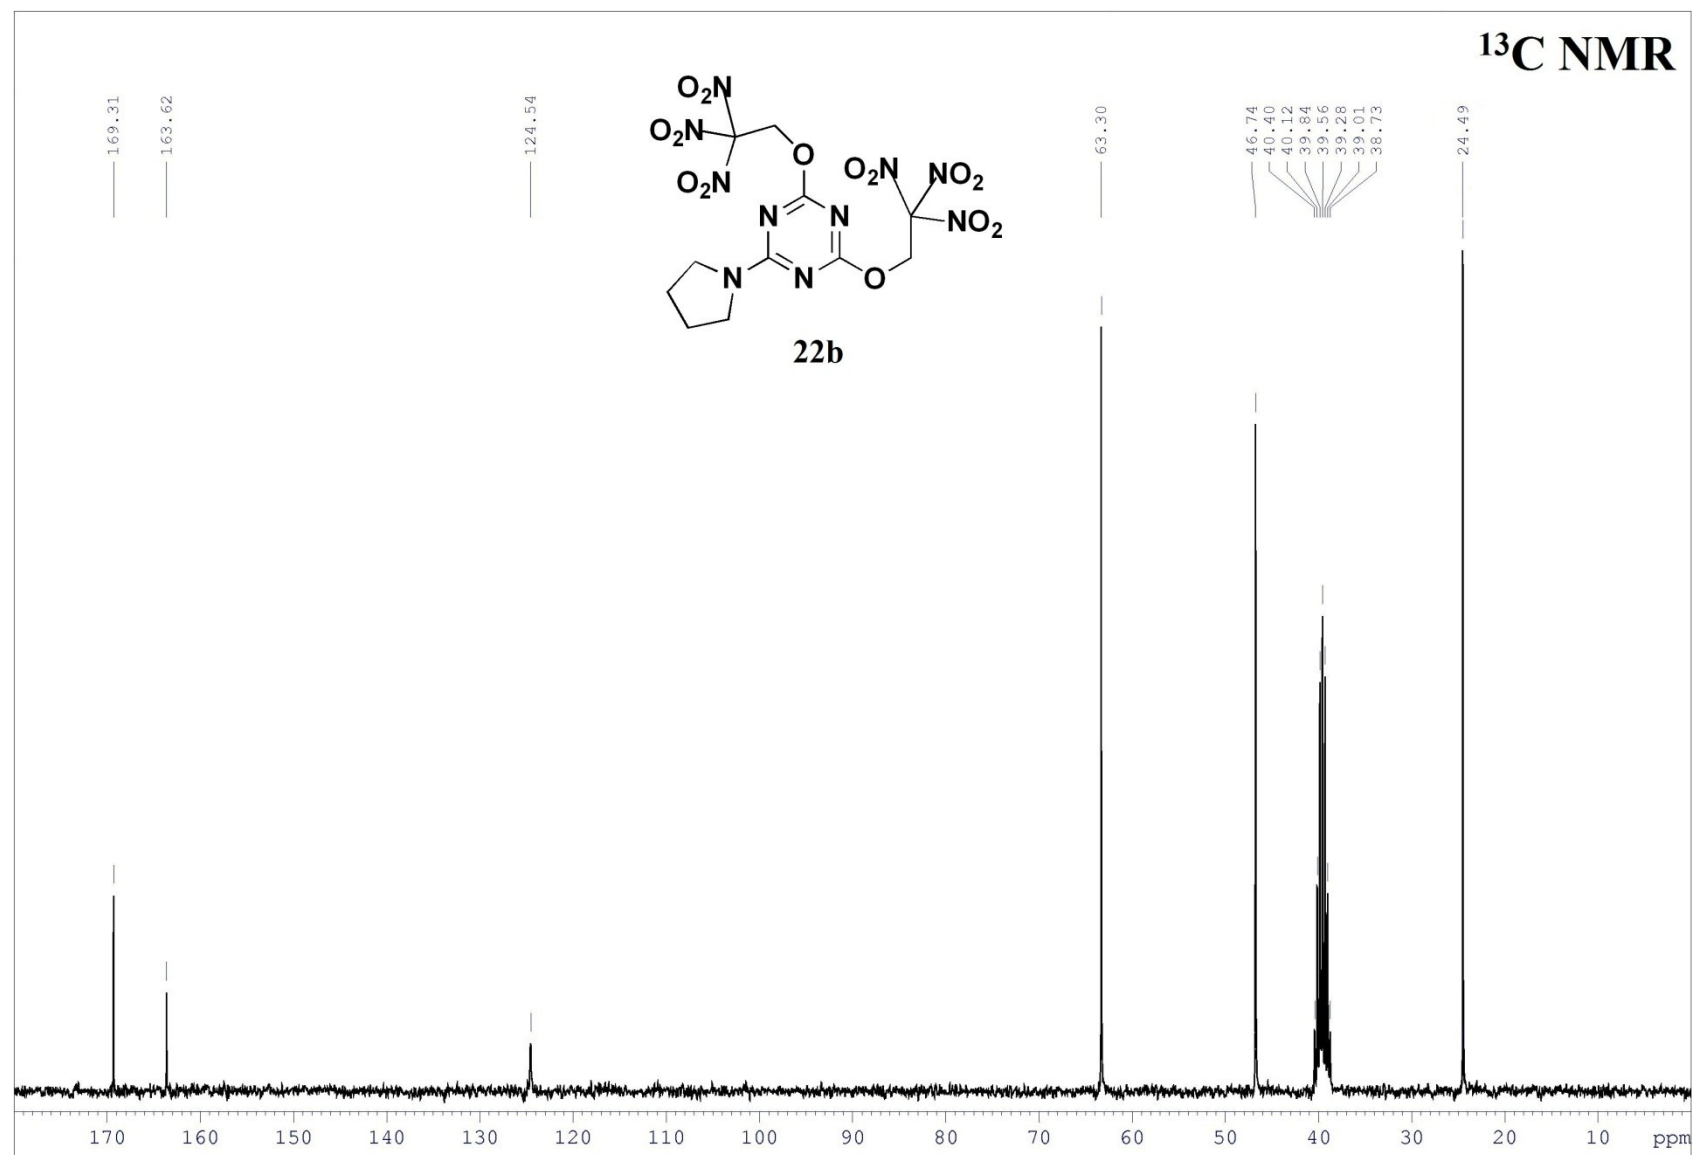

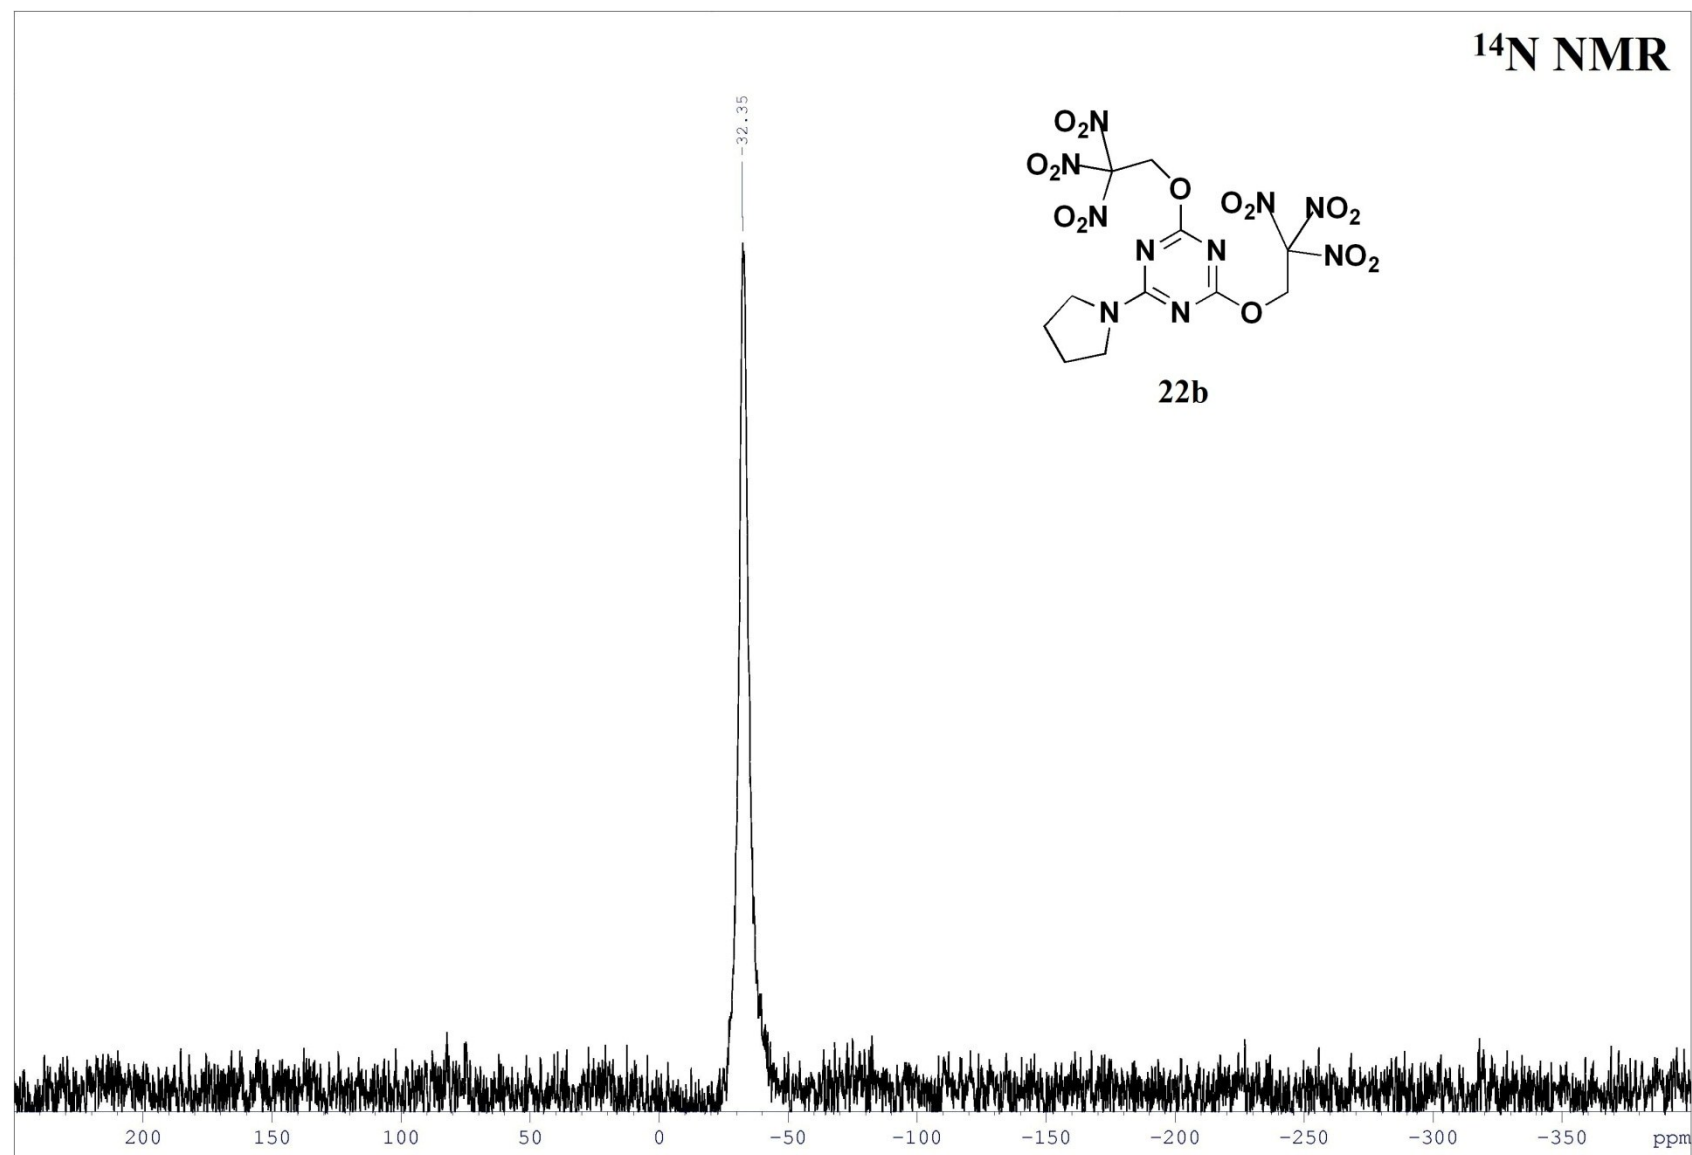

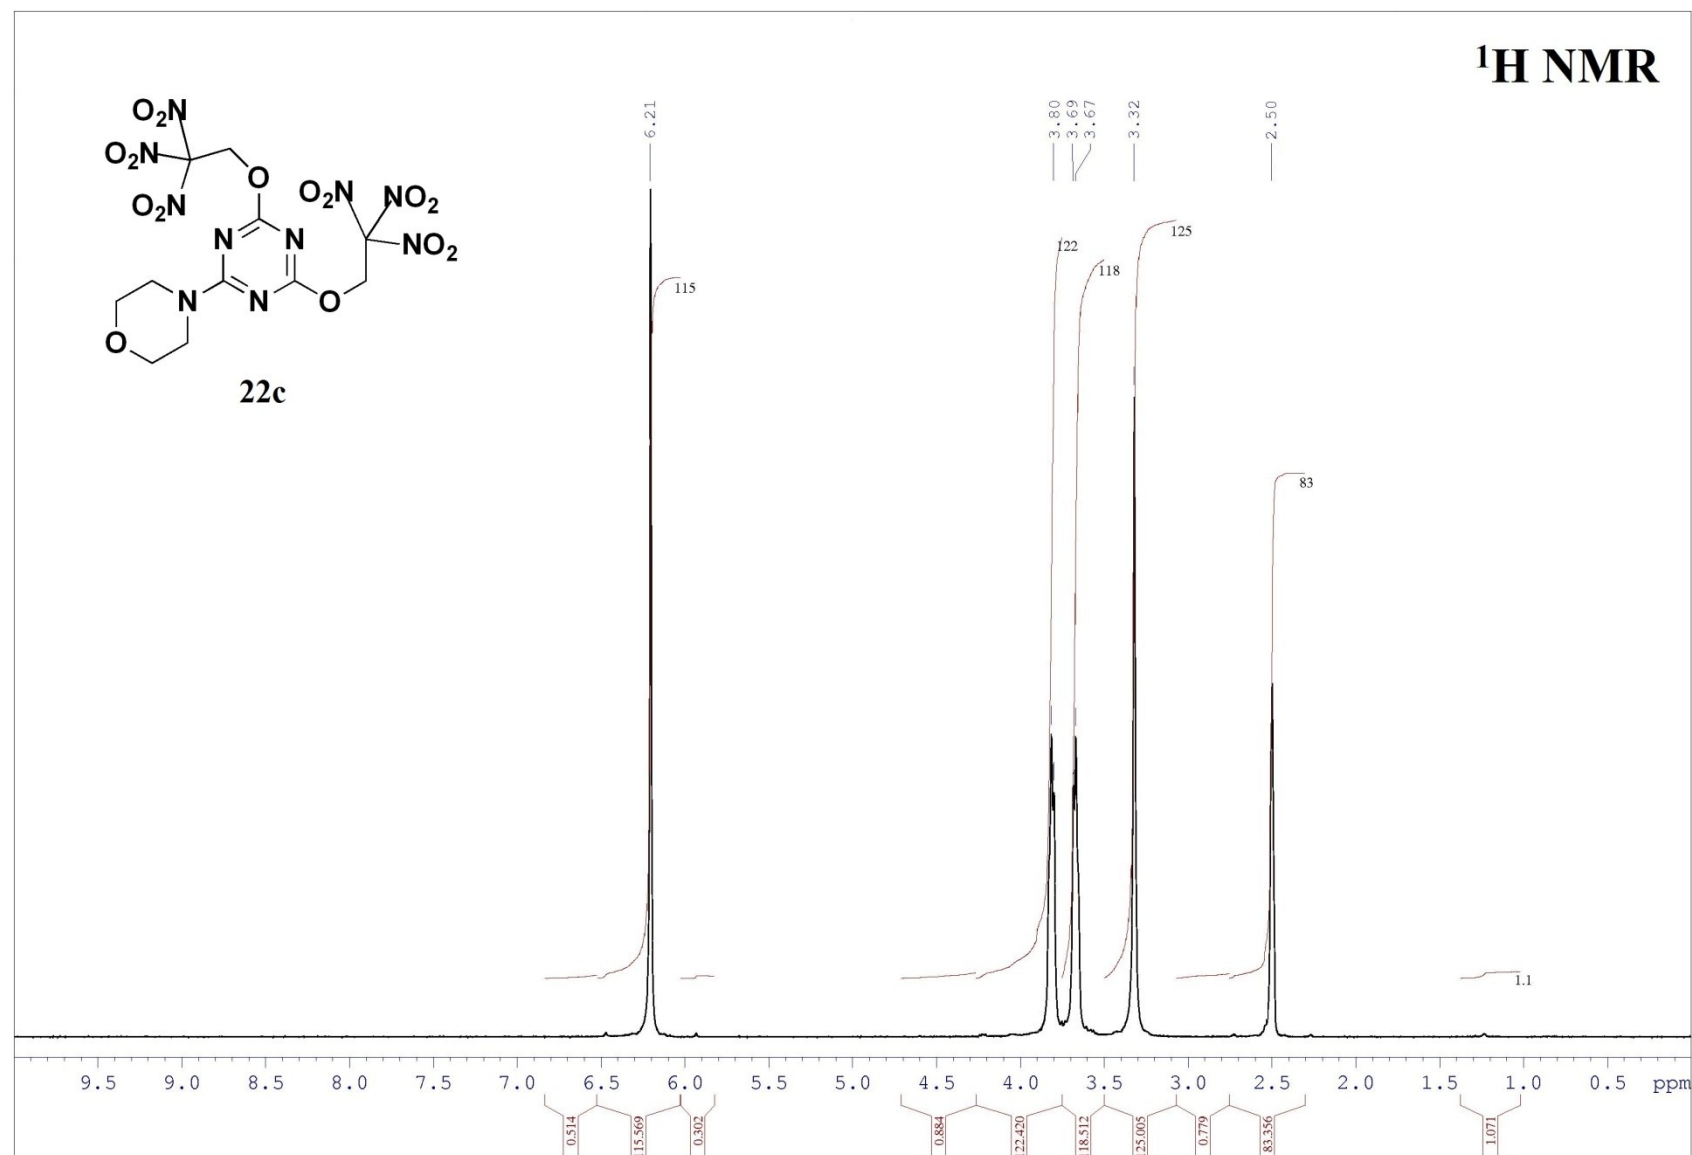

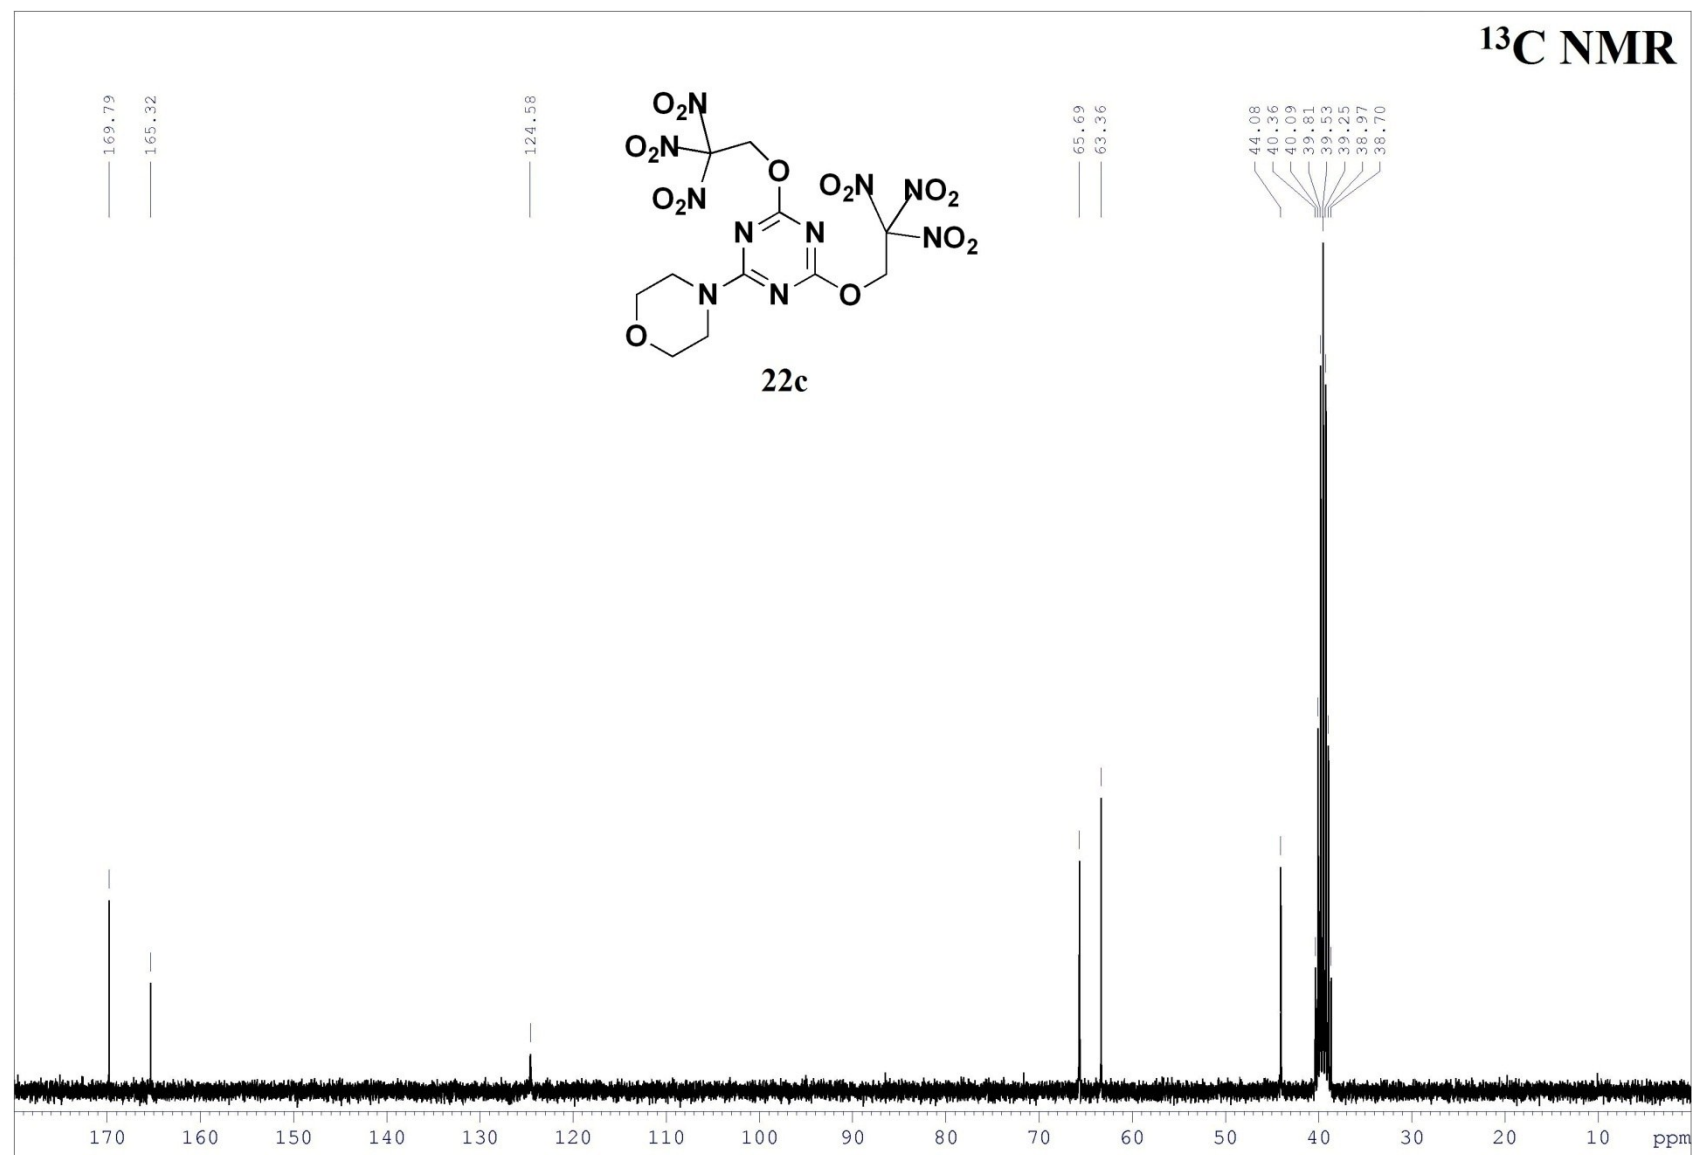

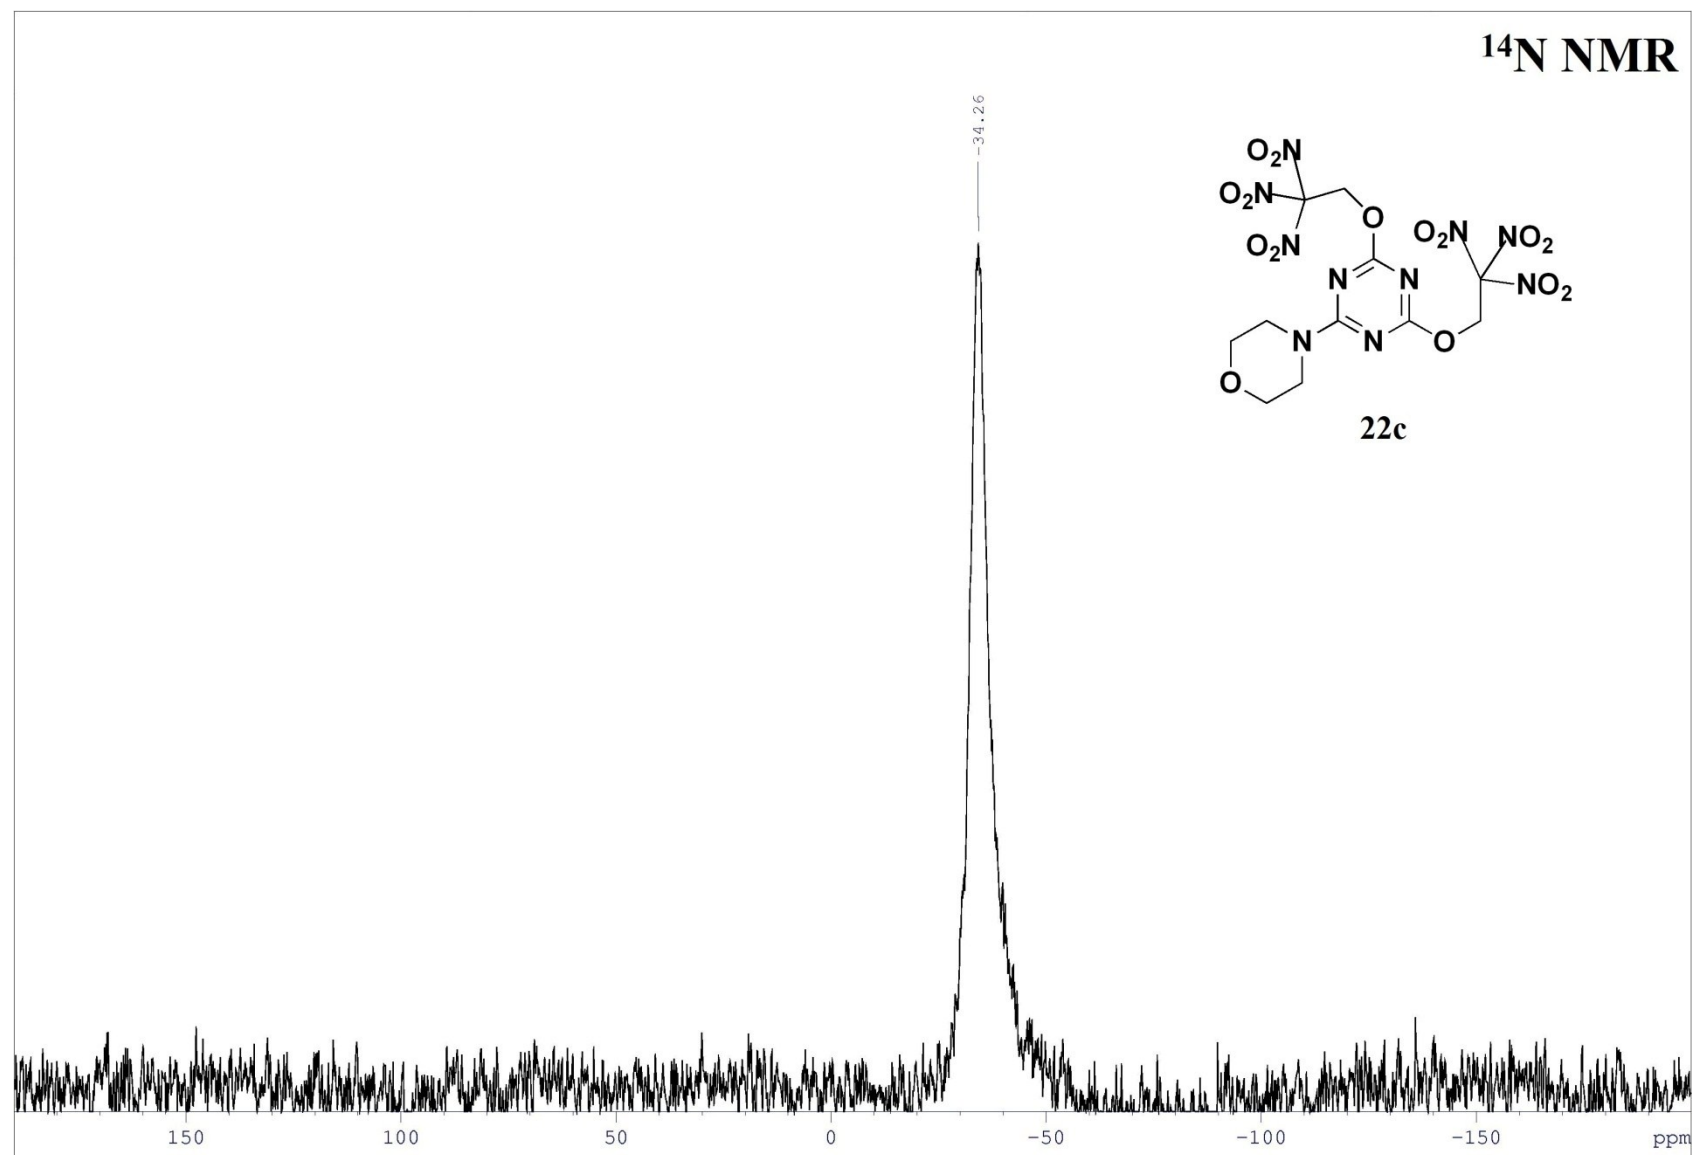

Supplement: c6ra05826d1.pdf [file c6ra05826d1.pdf]
